# Supplementary material for: MicroRNA Gene Dosage Alterations and Drug Response in Lung Cancer
Source: Hindawi journal article supplement (doi:10.1155/2011/474632), 2011-01-01
Supplement: f1 [file 474632.f1.xlsx]

## Sheet: Supplemental Table 1
Supplemental Table 1 - List of 18 drugs analyzed in this study
Drug	Abbreviation	Description	PubMed ID
Geldanamycin	Gel	An antibody that targets HSP90AA1 and HSP90AB1	5459626
Rapamycin	Ra	A tyrosine kinase inhibitor that targets MTOR	7822316
PHA665752	PHA	A kinase inhibitor that targets MET	15788682
Paclitaxel	Pa	A mitotic inhibitor which targets the ß subunit of tubulin	6149569
Gö 6976	Go	A protein kinase C inhibitor (PRKCA, PRKCB)	8486620
MG-132	MG	An inhibitor of the 26S proteasome	9789328
AZ628	AZ	A RAF kinase inhibitor, which targets wild type BRAF, CRAF, and mutant BRAF V600E	18077425
MK-0457	MK	A small molecule inhibitor that targets aurora kinase (AURKA, AURKB, AURKC, ABL1)	20386909
TAE684	TAE	A small molecule inhibitor that targets ALK and NPM-ALK	17185414
Sunitinib	Sun	A receptor tyrosine kinase inhibitor that targets PDGFRA, KIT and FLT3	12531805
Erlotinib	Erl	A tyrosine kinase inhibitor that targets EGFR	10525095
PF-2341066 (Crizotinib)	PF	A receptor tyrosine kinase inhibitor that targets c-MET and NPM/EML4-ALK fusion	17483355
Sorafenib	Sor	A tyrosine kinase inhibitor that targets C-RAF, B-RAF (PDGFRA, KIT, KDR, FLT3)	12369853, 15208680
Imatinib	Im	A tyrosine kinase inhibitor that targets PDGFRA, TEL-PDGFR, KIT and ABL, BCR-ABL	9389713
AZD0530 (Sarcatinib)	AZD	A tyrosine kinase dual inhibitor of SRC and BCR-ABL	17064066
PD173074	PD	A tyrosine kinase inhibitor of FGFR1 and FGFR3	10987832
Cyclopamine	Cy	A steroidal alkaloid that inhibits the sonic hedgehog pathways by inhibiting SMO	9616123
HKI-272 (Neratinib)	HKI	A tyrosine kinase dual inhibitor of SRC and BCR-ABL; targets EGFR and ERBB2	15173008

## Sheet: Supplemental Table 2
Supplemental Table 2 - List of lung cancer cell lines with either SNP 6.0 copy number, miRNA expression, or IC50 response
Cell Line	SNP 6.0	miRNA Expression	IC50
A427	X	X	X
A549	X	X	X
ABC-1	X	X	X
BEN	X	X	X
CAL-12T	X	X	X
Calu-1	X	X	X
Calu-3	X	X	X
Calu-6	X	X
ChaGo-K-1	X	X	X
COLO-668	X	X
COR-L105	X	X	X
COR-L23	X	X	X
COR-L279	X	X
COR-L51	X	X
COR-L88	X	X
COR-L96CAR	X	X
CPC-N	X	X
DMS-114	X	X
DMS-153	X	X
DMS-273	X	X	X
DMS-53	X	X	X
DMS-79	X	X
DV-90	X	X	X
EKVX	X	X
EPLC-272H	X	X	X
HOP-62	X	X
HOP-92	X	X	X
IA-LM	X	X
IST-SL1	X
IST-SL2	X	X
KNS-62	X	X
LB647-SCLC	X	X
LC-1F	X	X
LCLC-103H	X	X	X
LCLC-97TM1	X	X	X
LK-2	X	X	X
LU-134-A	X	X
LU-135	X	X	X
LU-139	X	X
LU-65	X	X
LU-99A	X	X	X
LXF-289	X	X
MS-1	X	X
NCI-H1048	X	X	X
NCI-H1092	X	X
NCI-H1105	X	X
NCI-H1155	X	X
NCI-H1299	X	X	X
NCI-H1304	X	X
NCI-H1355	X	X
NCI-H1395	X	X
NCI-H1436	X	X
NCI-H1437	X	X	X
NCI-H146	X	X
NCI-H1522	X	X
NCI-H1563	X	X	X
NCI-H157	X	X
NCI-H1573	X		X
NCI-H1618	X
NCI-H1650	X	X	X
NCI-H1666	X	X	X
NCI-H1693	X	X	X
NCI-H1703	X	X	X
NCI-H1755	X	X	X
NCI-H1770	X	X
NCI-H1792	X	X	X
NCI-H1793	X	X	X
NCI-H1838	X	X
NCI-H1926	X	X
NCI-H1930	X	X
NCI-H1975	X	X	X
NCI-H1993	X		X
NCI-H2009	X	X	X
NCI-H2029	X	X	X
NCI-H2030	X	X	X
NCI-H2081	X
NCI-H2087	X	X	X
NCI-H209	X	X
NCI-H2107	X
NCI-H2126	X	X
NCI-H2141	X
NCI-H2170	X	X	X
NCI-H2171	X	X
NCI-H2196	X	X	X
NCI-H2227	X	X
NCI-H2228	X	X	X
NCI-H226	X	X
NCI-H2291	X	X
NCI-H23	X	X	X
NCI-H2330	X
NCI-H2342	X		X
NCI-H2347	X	X	X
NCI-H2405	X	X	X
NCI-H250	X	X
NCI-H292	X	X	X
NCI-H345	X	X
NCI-H358	X	X	X
NCI-H378	X
NCI-H441	X	X	X
NCI-H446	X	X
NCI-H460	X	X	X
NCI-H510A	X	X
NCI-H520	X	X	X
NCI-H522	X	X	X
NCI-H524	X	X
NCI-H526	X	X
NCI-H596	X	X	X
NCI-H64	X	X
NCI-H650	X	X	X
NCI-H661	X	X	X
NCI-H727	X	X	X
NCI-H810	X	X	X
NCI-H82	X	X
NCI-H838	X	X	X
NCI-H889	X	X
NCI-N417	X	X
PC-14	X	X	X
RERF-LC-FM	X	X
RERF-LC-MS	X	X	X
SBC-1	X
SBC-5	X	X	X
SCLC-21H	X	X	X
SHP-77	X	X	X
SK-LU-1	X	X	X
SK-MES-1	X	X	X
SW1573	X	X	X
SW900	X	X	X
UMC-11	X	X	X
NCI-H2122			X
NCI-H1623			X
NCI-H1734			X
NCI-H1651			X
NCI-H1581			X
VMRC-LCP			X
TOTALS	67	64	73

## Sheet: Supplemental Table 3
Supplemental Table 3 - Summary of copy number alteration comparisons for all miRNAs across all drugs
	AZ628						AZD0530						Cyclopamine						Erlotinib						Geldanamycin						Go-6976						HKI-272						Imatinib						MG-132
miRNA	Status	pValue	FregGainHigh	FreqGainLow	FreqLossHigh	FreqLossLow	Status	pValue	FregGainHigh	FreqGainLow	FreqLossHigh	FreqLossLow	Status	pValue	FregGainHigh	FreqGainLow	FreqLossHigh	FreqLossLow	Status	pValue	FregGainHigh	FreqGainLow	FreqLossHigh	FreqLossLow	Status	pValue	FregGainHigh	FreqGainLow	FreqLossHigh	FreqLossLow	Status	pValue	FregGainHigh	FreqGainLow	FreqLossHigh	FreqLossLow	Status	pValue	FregGainHigh	FreqGainLow	FreqLossHigh	FreqLossLow	Status	pValue	FregGainHigh	FreqGainLow	FreqLossHigh	FreqLossLow	Status
hsa-let-7a-1_0		0.48281	5	2	4	6		0.410253	9	8	4	2		0.674888	4	3	3	6	Low	0.0221879	8	8	3	2		0.347848	4	3	8	4		0.254573	7	3	5	4		0.268334	2	6	5	5		0.0876003	7	4	6	2
hsa-let-7a-2_0		1	4	5	5	4		0.0860977	8	7	3	2		0.318793	5	8	6	2		0.510463	9	8	3	2		1	4	5	5	5		0.831839	4	6	4	3		0.674888	3	6	4	3		0.717649	3	6	2	3
hsa-let-7a-3_0		1	3	2	9	9		0.310731	5	7	3	3		0.568034	2	3	11	7		0.406386	7	4	5	2		0.560678	3	1	9	8		0.112299	3	1	13	8		0.601689	4	2	8	7		0.898797	2	2	7	9
hsa-let-7b_0		1	3	2	9	9		0.310731	5	7	3	3		0.568034	2	3	11	7		0.406386	7	4	5	2		0.560678	3	1	9	8		0.112299	3	1	13	8		0.601689	4	2	8	7		0.898797	2	2	7	9
hsa-let-7c_0		0.460167	4	1	6	6		0.517988	6	7	4	2		0.116819	3	2	11	5		0.23711	8	5	3	2		0.77307	4	2	8	8		0.216388	5	3	10	6		0.769284	4	2	7	7		0.52029	4	2	6	6
hsa-let-7d_0		0.48281	5	2	4	6		0.410253	9	8	4	2		0.674888	4	3	3	6	Low	0.0221879	8	8	3	2		0.347848	4	3	8	4		0.254573	7	3	5	4		0.268334	2	6	5	5		0.0876003	7	4	6	2
hsa-let-7e_0		0.118726	8	3	6	4		0.452538	9	8	3	2		0.375872	8	4	3	6		0.845624	9	9	3	2		0.528101	6	6	6	3		1	6	7	4	4		0.425938	5	5	4	8		0.235428	7	3	5	5
hsa-let-7f-1_0		0.48281	5	2	4	6		0.410253	9	8	4	2		0.674888	4	3	3	6	Low	0.0221879	8	8	3	2		0.347848	4	3	8	4		0.254573	7	3	5	4		0.268334	2	6	5	5		0.0876003	7	4	6	2
hsa-let-7g_0		0.357977	0	1	15	11		0.530829	4	6	9	5		0.525602	0	0	13	16		0.357977	4	4	8	7		1	0	0	13	12		0.124264	0	0	16	10		0.0689935	0	1	15	8		0.420437	1	0	11	12
hsa-let-7i_0		0.0786946	10	5	2	0		0.152124	7	7	4	2		1	6	6	2	2		1	6	6	3	4	High	0.0261712	9	2	3	2		1	5	5	3	2		0.631932	8	6	2	1		0.357395	7	4	1	3
hsa-mir-100_0		1	4	5	5	4		0.0860977	8	7	3	2		0.318793	5	8	6	2		0.510463	9	8	3	2		1	4	5	5	5		0.831839	4	6	4	3		0.674888	3	6	4	3		0.717649	3	6	2	3
hsa-mir-101-1_0		0.24729	7	2	3	4		0.379034	10	8	3	2		0.89679	3	5	3	3		0.703122	8	8	3	2		0.659406	6	4	3	2		0.691704	6	4	4	3		0.754431	5	5	2	4		0.671321	6	3	3	4
hsa-mir-101-2_0		0.594873	2	0	12	13		1	5	8	6	4		0.261118	3	0	11	14		0.681917	5	4	5	4	Ambiguous	0.0306952	3	0	15	11		0.157261	2	1	16	11		0.902196	2	2	12	10		0.488052	1	2	14	12
hsa-mir-103-1_0		0.120761	5	8	6	1		0.0584872	8	7	4	2		0.400236	6	9	2	4		1	8	7	3	2		0.703122	7	6	4	2		0.845624	6	7	3	4		0.681917	8	6	3	2		0.690613	5	7	4	2
hsa-mir-103-1-as_0		0.120761	5	8	6	1		0.0584872	8	7	4	2		0.400236	6	9	2	4		1	8	7	3	2		0.703122	7	6	4	2		0.845624	6	7	3	4		0.681917	8	6	3	2		0.690613	5	7	4	2
hsa-mir-103-2_0		1	7	7	5	6		0.782788	10	8	3	2		0.73104	8	11	4	4		0.300865	9	9	3	2		0.857609	7	8	4	5		0.73104	9	7	5	4		0.347572	7	9	4	7		0.784591	7	9	5	4
hsa-mir-103-2-as_0		1	7	7	5	6		0.782788	10	8	3	2		0.73104	8	11	4	4		0.300865	9	9	3	2		0.857609	7	8	4	5		0.73104	9	7	5	4		0.347572	7	9	4	7		0.784591	7	9	5	4
hsa-mir-106b_0		0.27868	10	9	4	1		0.0930077	8	8	4	3		0.105929	7	13	5	1		1	8	6	4	3		0.144721	6	12	4	1		0.716098	8	11	4	3		0.814173	10	12	2	1		0.472947	13	8	2	3
hsa-mir-107_0		0.447383	3	3	9	5	High	0.00725777	7	6	3	3		0.654411	2	4	9	7		0.73104	6	7	6	2		0.270388	1	4	10	6		0.460351	1	3	11	8		0.737899	1	3	8	8		0.583146	2	5	7	6
hsa-mir-10a_0		0.11591	11	5	0	0		0.537488	6	7	9	5		0.75967	9	8	1	0		0.11591	5	5	7	6		0.202747	10	5	0	1		0.124264	11	6	1	0		0.75967	9	8	1	0		0.260638	5	9	0	1
hsa-mir-10b_0		0.0975816	8	3	0	2		0.43048	6	7	7	5		1	7	7	1	0		0.812543	5	5	6	5		0.357977	10	7	1	0		0.80915	9	7	1	2		1	8	8	1	1		0.487712	9	6	2	1	High
hsa-mir-1-1_0		0.643832	13	10	1	2		1	6	7	6	3		0.433372	12	12	2	0		0.754622	5	5	5	5		0.454442	13	16	2	0		0.206589	15	10	2	1		0.80915	14	12	1	2		1	13	12	1	1
hsa-mir-1178_0	Ambiguous	0.0171054	10	6	4	0		1	8	7	5	3		0.898213	8	6	2	2		0.687572	5	7	4	3	High	0.0171424	10	2	1	3		1	6	7	2	2		0.389583	8	5	4	2		0.729433	7	6	1	3
hsa-mir-1179_0		0.202356	6	4	7	3		0.364546	9	9	4	2		0.400111	8	4	4	4		1	8	8	3	3		0.0589024	9	2	3	5		0.916874	7	5	4	4		0.840143	4	3	6	5		0.553372	4	5	3	1
hsa-mir-1180_0		0.298095	3	3	11	6		0.0758016	8	7	3	3		0.563166	2	3	10	6		0.850578	7	7	4	2		0.469861	4	1	7	8		0.539348	4	2	9	7		0.440682	7	3	5	6		0.116205	3	2	9	4
hsa-mir-1181_0		0.50419	4	2	7	10		0.763725	8	8	3	3		0.77307	4	2	8	8		0.153917	7	6	5	3		0.0606952	5	0	7	7		0.0815714	7	1	5	6		0.150267	6	1	6	9		0.451232	5	2	6	7
hsa-mir-1182_0		0.397253	13	9	2	1		1	6	7	7	3		0.643832	8	10	1	2		0.667384	5	5	4	5		0.902196	10	8	2	2		0.504461	11	8	2	1		0.504461	13	9	1	2		0.873166	9	11	1	1
hsa-mir-1183_0		0.494096	15	11	1	2		0.488052	7	7	7	3		0.639506	11	13	1	2		0.620481	5	6	6	3		0.483069	15	12	2	1		0.144856	17	11	1	1		0.284464	15	10	2	2		0.232066	15	9	1	3
hsa-mir-1185-1_0		1	8	8	4	3		0.821458	7	7	3	3		0.393521	6	9	4	1		0.336168	8	7	3	2		1	7	7	2	3		0.920894	9	7	4	4		0.436987	6	9	5	2		0.162158	10	6	3	2
hsa-mir-1185-2_0		1	8	8	4	3		0.821458	7	7	3	3		0.393521	6	9	4	1		0.336168	8	7	3	2		1	7	7	2	3		0.920894	9	7	4	4		0.436987	6	9	5	2		0.162158	10	6	3	2
hsa-mir-1197_0		1	8	8	4	3		0.821458	7	7	3	3		0.393521	6	9	4	1		0.336168	8	7	3	2		1	7	7	2	3		0.920894	9	7	4	4		0.436987	6	9	5	2		0.162158	10	6	3	2
hsa-mir-1-2_0		0.703122	4	3	5	8		0.737188	7	8	5	2		0.619902	2	4	6	4		0.703122	7	8	4	3		0.754431	4	2	5	5		0.703122	3	4	5	7		0.333661	1	3	5	8		0.0626902	0	3	9	4
hsa-mir-1200_0		0.11591	16	11	1	0		0.117502	6	7	8	5		0.536507	12	14	0	1		0.525602	5	5	7	6		0.202747	16	12	1	0		0.103992	18	12	0	0		0.156342	16	10	1	1		0.754622	14	12	1	1
hsa-mir-1201_0		1	7	7	2	3		0.26277	9	8	3	2		1	6	7	3	3		0.681917	7	9	3	2		0.830356	6	8	3	2		1	7	6	2	3		1	7	8	3	3		0.0644669	11	4	3	5
hsa-mir-1202_0		0.690288	3	2	9	12		1	5	6	5	3		1	2	2	11	10		0.476082	7	5	5	5		0.74082	1	3	9	9		0.413638	1	3	8	10		0.563588	3	1	9	12		0.893234	1	2	9	12
hsa-mir-1203_0		0.0617784	12	5	0	0		0.537488	6	7	9	5		0.75967	9	8	1	0		0.11591	5	5	7	6		0.11591	11	5	0	1		0.066585	12	6	1	0		0.543374	10	8	1	0		0.430177	6	9	0	1
hsa-mir-1204_0		0.339237	19	15	1	1		0.662796	6	7	8	4	High	0.0243372	21	14	0	2	Ambiguous	0.045948	5	5	6	6		0.240445	19	16	1	0		0.41887	18	18	2	0		0.0945722	20	16	1	0		0.664034	18	19	0	1
hsa-mir-1205_0		0.339237	19	15	1	1		0.662796	6	7	8	4	High	0.0243372	21	14	0	2	Ambiguous	0.045948	5	5	6	6		0.240445	19	16	1	0		0.41887	18	18	2	0		0.0945722	20	16	1	0		0.664034	18	19	0	1
hsa-mir-1206_0		0.339237	19	15	1	1		0.662796	6	7	8	4	High	0.0243372	21	14	0	2	Ambiguous	0.045948	5	5	6	6		0.240445	19	16	1	0		0.41887	18	18	2	0		0.0945722	20	16	1	0		0.664034	18	19	0	1
hsa-mir-1207_0		0.339237	19	15	1	1		0.662796	6	7	8	4	High	0.0243372	21	14	0	2	Ambiguous	0.045948	5	5	6	6		0.240445	19	16	1	0		0.41887	18	18	2	0		0.0945722	20	16	1	0		0.664034	18	19	0	1
hsa-mir-1208_0		0.339237	19	15	1	1		0.580904	6	7	8	4	High	0.0106651	21	13	0	2	Ambiguous	0.0212499	5	5	6	6		0.132391	19	15	1	0		0.41887	18	18	2	0	High	0.045948	20	15	1	0		1	18	18	0	1
hsa-mir-122_0		1	5	4	11	11		0.144489	8	9	5	2		0.522328	4	3	12	9		0.627483	8	7	3	4		0.130444	7	2	6	11		0.793046	5	3	9	11		0.40538	4	1	10	10		0.22641	1	5	12	9
hsa-mir-1224_0	High	0.0158216	14	5	1	2		0.0774223	8	9	4	3		1	10	9	3	3		1	7	7	5	4		0.223375	12	7	1	4		0.144721	12	6	1	4		0.741773	11	9	1	3		0.0601268	13	6	1	3
hsa-mir-1225_0	High	0.0409511	9	2	2	5		0.531328	10	7	3	3		0.898213	8	6	2	2		0.207446	7	8	5	3		0.0791137	8	5	1	7	High	0.0135361	9	1	4	4		0.0815714	6	5	1	7		0.645637	5	7	5	3
hsa-mir-1226_0		0.667384	1	1	14	10		0.122551	7	7	6	4		0.466529	2	0	12	15		0.123964	7	6	5	5		0.170726	3	0	12	11	Low	0.00920167	3	0	15	9	Low	0.037011	3	1	14	8		0.31271	3	1	10	12
hsa-mir-1227_0		0.276295	4	1	7	11		0.366146	9	8	4	3		0.83777	3	2	10	9		0.350053	7	7	5	4		0.095098	4	0	7	11		0.0929139	6	1	5	10		0.40137	4	1	7	10	Ambiguous	0.0140925	5	1	9	5
hsa-mir-1228_0		0.131586	11	6	3	1		0.205165	8	9	4	2		1	6	6	3	3		1	8	7	3	4	High	0.0114876	11	3	3	2		0.840143	7	5	3	4		0.346667	9	6	3	1		0.28474	7	5	1	5
hsa-mir-1229_0		0.445626	6	9	3	1		0.161876	7	8	6	3		0.073759	8	10	0	4		1	5	6	3	3		1	9	8	2	2		1	8	9	2	2		0.900758	9	7	2	2		0.120672	7	9	4	0
hsa-mir-1231_0		0.398878	12	8	2	1		0.763493	6	7	6	4		0.504461	8	11	1	2		0.0781208	6	6	5	4		0.261118	8	8	0	3		0.812543	10	8	1	2		0.159916	11	8	0	4		0.31499	9	11	0	2
hsa-mir-1233_0		1	3	4	6	6		1	9	8	3	2		0.510463	4	6	6	3		0.831839	7	8	3	2		0.518564	4	2	7	5		0.351711	4	2	6	3		0.447383	3	3	9	5		0.81997	3	5	4	3
hsa-mir-1233_1		0.830356	2	4	7	6		1	7	9	4	3		0.44569	3	5	7	3		0.814222	5	7	4	3		0.472835	3	1	7	5		0.888533	2	2	6	4		0.554683	2	3	9	5		1	2	3	4	4
hsa-mir-1234_0		0.869131	15	13	1	1		0.499362	6	8	6	3		0.0888026	16	10	0	3		0.0546139	6	6	5	4		0.157261	16	11	2	1		0.216697	15	12	3	1		0.105844	17	11	0	3		0.412345	17	14	0	2
hsa-mir-1236_0		1	4	3	5	6		0.892875	9	7	3	3		0.329329	5	2	6	4		0.697309	7	8	5	2		0.126773	5	1	5	3		0.333714	3	3	5	1		1	3	3	4	4		1	3	4	4	5
hsa-mir-1237_0		0.674888	3	6	4	3		0.319134	9	8	4	3		0.712257	5	6	3	5		0.691704	7	7	4	2		0.469861	8	6	1	4		1	7	6	2	3		1	7	6	2	2		0.534181	8	6	3	3
hsa-mir-1238_0		0.50419	4	2	7	10		0.763725	8	8	3	3		0.77307	4	2	8	8		0.153917	7	6	5	3		0.0606952	5	0	7	7		0.0815714	7	1	5	6		0.150267	6	1	6	9		0.451232	5	2	6	7
hsa-mir-124-1_0		0.620481	1	2	16	13		0.701973	6	7	6	4		1	1	1	15	14		0.360198	6	6	5	5		0.234308	3	0	13	17		0.60406	2	1	16	14		0.141084	4	0	13	14		0.282513	1	3	10	15
hsa-mir-124-2_0		0.606069	9	11	5	2		0.780813	9	8	3	2		0.1724	12	6	3	7	Ambiguous	0.0417909	9	8	3	2		0.209941	11	8	6	3		0.0884282	12	7	6	4	High	0.00514445	16	5	3	8		0.181429	11	10	2	7
hsa-mir-1243_0		0.762554	1	0	12	11		0.525388	4	6	9	5		1	0	1	11	11		0.75967	4	4	8	7		1	0	0	11	10		0.762554	0	0	11	9		1	0	1	11	11		0.214603	0	0	7	14
hsa-mir-124-3_0		0.501076	14	10	1	2		0.720935	6	7	6	3		0.662731	12	14	2	0		1	5	5	5	5		0.302943	12	16	2	0		0.383827	15	11	2	1		1	13	13	1	2		1	13	12	1	1
hsa-mir-1244_0		0.159723	6	3	0	3		0.229537	6	7	6	4		0.569678	5	6	2	0		0.589218	5	5	4	5		0.321245	7	4	0	2		0.894298	7	5	2	2		1	5	6	2	1		0.650933	5	6	3	1	High
hsa-mir-1244_1		0.413422	5	3	7	4		0.0533148	8	8	3	2		0.440682	6	5	3	7		1	8	7	3	2		0.192327	6	2	5	3		1	5	5	5	6		0.912805	4	4	6	4		0.494518	2	4	4	6
hsa-mir-1244_2		0.443697	4	5	8	4		0.176365	10	6	3	2		0.0605904	2	8	8	3		0.633524	7	9	4	2		0.154055	2	6	7	9	Low	0.0313305	1	8	8	5		0.537878	3	6	7	7		0.771125	6	4	4	5
hsa-mir-1244_3		0.856879	5	6	7	5		0.0587183	10	7	3	2	Low	0.0348367	2	10	7	4		0.549576	8	9	3	2		0.285554	3	6	7	9		0.133961	2	8	7	5		1	5	6	7	6		0.623456	7	4	5	6
hsa-mir-1245_0		0.25005	8	3	2	2		0.231895	7	7	6	4		0.803697	8	6	1	2		0.40137	6	6	5	4		0.229855	10	6	0	2		0.0911665	10	6	0	4		0.589218	8	7	0	2	Low	0.0253511	8	6	5	0
hsa-mir-1246_0		0.197458	8	4	0	2		0.316987	6	7	7	5		1	7	8	1	0		0.812543	5	5	6	5		0.357977	10	7	1	0		1	9	8	1	2		1	9	8	1	1		0.633607	9	7	2	1	High
hsa-mir-1247_0		1	8	8	4	3		0.476865	6	8	3	3		0.393521	6	9	4	1		0.213946	7	6	3	3		1	7	8	2	2		0.850578	9	8	4	3		0.193445	6	10	5	1		0.163262	11	6	2	2
hsa-mir-1248_0	High	0.0348615	13	5	1	2		0.110267	8	9	4	3		1	10	9	3	3		1	7	7	5	4		0.276295	11	7	1	4		0.0961668	12	5	1	4		0.741773	11	9	1	3		0.0601268	13	6	1	3
hsa-mir-1249_0		0.74082	3	1	9	9		0.483712	5	7	4	3		0.358991	2	2	12	7		0.270265	7	4	5	3		0.413638	3	1	10	8		0.112299	3	1	13	8		1	3	2	8	8		0.808838	2	2	7	10
hsa-mir-1250_0		0.167497	13	7	1	1		0.875029	6	7	9	5		1	9	9	1	0		0.763493	5	5	7	6		0.223143	11	7	1	0	High	0.0328649	13	6	1	0		0.275578	11	6	1	1		1	8	8	0	1
hsa-mir-1251_0		0.161856	10	5	2	1		1	8	7	6	4		1	7	7	1	2		0.260734	5	7	6	3	High	0.0117255	9	2	0	3		1	6	5	1	1		0.672829	8	5	2	3		0.375118	8	5	1	3
hsa-mir-1252_0		0.0786946	10	5	2	0		0.425139	7	7	5	2		1	7	7	2	2		0.681917	5	6	4	3	High	0.0478521	9	2	2	2		0.725176	6	6	3	1		0.672829	8	5	2	2		0.650933	7	5	1	3
hsa-mir-1253_0		0.464602	4	2	11	9		0.564438	8	8	4	3		0.569621	3	2	11	8		0.131907	7	7	4	3		0.228482	3	1	5	10		0.774896	4	2	9	9		0.479844	5	3	5	9		0.218995	1	4	9	5
hsa-mir-1254_0		0.504769	3	5	7	4	Ambiguous	0.00887191	9	8	3	2		0.548563	3	5	5	7		0.734204	9	9	3	2		0.622449	3	6	7	6		1	3	3	9	8		0.785335	3	5	6	6		0.918077	5	4	5	6
hsa-mir-1255a_0		1	1	1	11	11		0.41435	4	6	9	5		1	1	1	10	10		0.323095	4	4	7	6		0.364044	0	1	12	8		0.378988	0	2	11	8		0.479446	0	2	9	10		0.266	1	0	7	13
hsa-mir-1255b-1_0		0.290123	3	4	9	4		0.145568	7	7	3	3		0.436823	4	3	5	9		0.0845481	6	7	6	2		0.168627	1	5	8	4		0.270388	1	4	10	6		0.312416	1	5	6	5		0.520477	3	2	5	10
hsa-mir-1255b-2_0		0.0657805	13	8	2	0		0.452256	6	7	7	4		1	10	11	1	0		0.213985	5	5	5	5		0.474708	9	8	2	0		0.814173	10	9	2	1		0.281852	14	9	1	1		0.427822	8	10	2	0
hsa-mir-1256_0		0.177588	4	0	7	8		0.323235	6	7	5	3		0.898213	2	2	8	6		1	7	6	5	5		0.252141	3	0	7	7		0.545232	3	1	7	6		0.311607	3	1	5	9		0.403854	3	1	4	7
hsa-mir-1257_0		0.643832	13	10	1	2		0.720935	6	7	6	3		0.594873	12	13	2	0		0.754622	5	5	5	5		0.454442	13	16	2	0		0.383827	15	11	2	1		1	14	13	1	2		1	13	12	1	1
hsa-mir-1258_0		0.0652336	8	3	0	3		0.247256	6	7	6	3		0.65538	7	7	2	0		0.902196	5	5	4	3		0.198673	10	7	2	0		0.900758	9	7	2	2		1	8	8	2	1		0.676712	9	6	2	2	High
hsa-mir-1259_0		0.494096	15	11	1	2		0.557713	6	7	6	3		0.65538	13	15	2	0		1	5	5	5	5		0.302943	12	16	2	0		0.383827	15	11	2	1		1	14	13	1	2		1	13	12	1	1
hsa-mir-125a_0		0.118726	8	3	6	4		0.452538	9	8	3	2		0.375872	8	4	3	6		0.845624	9	9	3	2		0.528101	6	6	6	3		1	6	7	4	4		0.425938	5	5	4	8		0.235428	7	3	5	5
hsa-mir-125b-1_0		1	4	5	5	4		0.0860977	8	7	3	2		0.318793	5	8	6	2		0.510463	9	8	3	2		1	4	5	5	5		0.831839	4	6	4	3		0.674888	3	6	4	3		0.717649	3	6	2	3
hsa-mir-125b-2_0		0.460167	4	1	6	6		0.517988	6	7	4	2		0.116819	3	2	11	5		0.23711	8	5	3	2		0.77307	4	2	8	8		0.216388	5	3	10	6		0.769284	4	2	7	7		0.52029	4	2	6	6
hsa-mir-126_0		0.421252	8	4	3	4		0.909292	8	8	5	2		0.63601	7	5	2	4		0.0853069	9	8	3	3		0.275671	6	5	7	3		0.728163	8	7	5	3		0.162821	3	8	3	4		0.0806412	8	8	6	1
hsa-mir-1260_0		1	9	8	2	2		0.793402	6	7	6	5		1	8	8	1	1		0.543374	6	6	6	3		1	7	8	1	1		0.560678	9	8	3	1		0.445626	6	9	3	1		0.19816	11	6	2	2
hsa-mir-1261_0		0.292992	7	7	6	2		0.0804353	8	8	4	2		0.519652	5	8	5	3	Ambiguous	0.0146218	9	8	3	2		0.410934	5	9	4	4		0.703122	5	8	3	3		0.916874	5	7	4	4		0.457196	8	5	2	3
hsa-mir-1262_0		0.691704	7	4	3	4		0.906478	9	8	3	2		1	4	3	3	3		1	8	7	3	2		1	5	5	3	2		0.691704	6	4	4	3		0.4446	6	3	2	4		0.242333	7	2	3	4
hsa-mir-1263_0	High	0.0305355	13	5	0	1		0.527254	6	7	7	4		1	9	9	2	1		0.900758	5	5	5	5		1	10	9	1	2		0.812543	10	8	1	2		0.763493	9	12	1	1		0.208858	13	7	1	2
hsa-mir-1265_0		0.73104	5	4	10	8		0.518554	10	9	3	2		0.920894	4	4	11	9		1	8	8	3	3		0.130444	7	2	9	9		0.28562	6	3	10	8		0.156838	6	1	8	10		0.612058	6	4	5	8
hsa-mir-1266_0		1	3	3	4	5		0.806752	6	9	4	3		1	4	4	4	3		1	5	5	6	3		0.166615	4	1	6	3		0.256426	3	1	5	2		0.44526	1	2	7	3		0.598968	4	2	2	3
hsa-mir-1267_0		0.80915	3	1	12	13		1	7	7	4	2		0.115031	1	5	16	10		0.914616	5	7	3	3		0.902196	2	2	12	10		0.690288	2	3	9	11		0.539348	2	4	13	9		0.912583	3	2	8	10	High
hsa-mir-1268_0		0.347561	4	9	8	5		0.786707	10	8	3	2		0.639277	6	8	7	4		1	9	9	3	2		0.351897	7	5	8	5		0.925032	6	6	7	5		0.477029	5	6	10	6		0.918693	6	6	4	5
hsa-mir-1269_0		1	2	2	9	8		0.114735	4	6	8	4		0.869131	1	1	6	8		0.0815381	5	4	6	6		1	1	2	7	6		0.309396	0	3	8	6		0.417453	0	2	8	6		0.311884	1	0	4	9
hsa-mir-127_0		1	8	8	4	3		0.821458	7	7	3	3		0.393521	6	9	4	1		0.336168	8	7	3	2		1	7	7	2	3		0.920894	9	7	4	4		0.436987	6	9	5	2		0.162158	10	6	3	2
hsa-mir-1270_0		0.793955	5	3	8	10		0.353755	9	7	3	3		0.406386	4	2	10	7		0.19964	7	7	5	2		0.140287	4	1	9	6		0.0993862	6	1	7	6		0.602872	5	2	7	8		0.487418	4	2	8	8
hsa-mir-1271_0		0.496722	6	9	4	2		0.0605957	9	8	4	2		0.716098	8	10	3	4		0.836994	9	8	3	2		1	8	8	3	3		0.913703	7	9	3	3		0.687572	9	7	3	2		1	7	8	4	3
hsa-mir-1272_0		0.814222	5	4	3	2		1	6	7	4	3		0.795644	6	5	2	1		0.823831	6	6	3	3	High	0.0261712	9	2	3	2		0.659406	6	4	3	2		1	3	4	4	3		0.875937	3	4	2	1
hsa-mir-1273_0		0.73281	12	14	3	1		0.372055	7	8	4	3		0.112295	16	9	1	4		0.0580902	7	7	5	3		0.150324	12	13	4	0		0.445626	13	12	3	1	High	0.00474369	18	8	2	4		0.335979	14	13	0	3
hsa-mir-1274a_0	High	0.0341817	18	10	0	2	Low	0.00816122	6	7	8	5		1	15	16	1	1		1	5	5	6	4		1	15	16	1	0		1	16	15	1	2		0.517087	15	15	2	0		0.0740894	19	12	1	2
hsa-mir-1274b_0		0.20318	10	4	3	4		0.101348	9	7	3	2		0.341921	10	5	2	4		0.836994	9	9	3	2		0.710544	6	9	3	3		0.913703	7	9	3	3		0.537878	7	7	3	6		0.619225	7	5	5	5
hsa-mir-1275_0		0.622449	6	3	6	8		1	10	8	3	2		0.148954	8	3	6	5		0.465244	8	9	3	2		0.261655	6	3	7	4		0.268334	5	5	6	2		0.712257	5	4	6	4		0.925356	5	7	5	6
hsa-mir-1276_0		0.254573	5	4	7	3		0.490063	8	9	4	2		1	6	5	4	4		0.912805	8	7	3	3		0.119682	8	2	3	5		1	6	5	4	4		1	3	4	6	5		0.527525	3	4	3	1
hsa-mir-1278_0		0.398878	13	8	1	2		0.504461	6	7	8	5		0.763493	10	11	0	1		0.170726	5	5	5	4		0.313869	7	9	0	2		1	9	9	1	2		1	10	10	1	2		0.567811	8	11	2	1
hsa-mir-1279_0	Ambiguous	0.0496932	11	7	3	0		0.279937	7	7	5	3		1	8	8	2	1		1	7	6	5	4		0.125584	10	5	3	1		0.606789	6	8	3	1		0.639506	9	7	2	1		0.306339	9	5	1	3
hsa-mir-1280_0		0.0631273	10	4	0	2		0.192144	7	8	5	2		1	8	8	3	2		1	7	6	3	4		0.681917	8	6	3	2		0.823831	5	7	3	2		0.639506	7	9	1	2		0.0926905	10	4	1	4
hsa-mir-1281_0		0.685649	3	1	8	9		0.303002	5	6	7	3		0.358991	2	2	12	7		0.503918	4	4	7	5		0.812543	2	1	9	8		0.669641	1	1	12	8		0.80915	1	2	7	8		0.487712	2	1	6	10
hsa-mir-128-1_0		0.434539	2	4	2	4		0.17981	8	6	5	3		0.784033	6	4	1	2		0.266612	6	7	5	2		0.28999	6	3	3	1		0.44526	7	3	1	2		0.640054	6	3	2	3		0.391019	3	7	2	3
hsa-mir-1282_0		1	2	2	6	7		1	8	9	4	3		0.674888	3	4	6	3		1	5	8	6	3		0.0739935	5	1	7	4	Ambiguous	0.0412941	4	1	7	2		0.431812	1	3	8	5		0.892875	3	3	4	3
hsa-mir-128-2_0		0.180156	2	2	13	7		0.548568	7	7	6	3		1	2	2	11	12		0.144864	7	6	5	5		0.130636	3	0	11	9		0.0554465	4	0	11	10		0.0500724	3	1	13	7		0.05249	4	0	9	13
hsa-mir-1283-1_0		0.284161	9	4	3	3		0.198083	9	7	4	2		0.37274	9	5	2	4		1	7	8	3	2		0.830356	6	8	3	2		0.834597	7	8	2	3		0.190061	6	7	2	6		0.716458	7	5	4	5
hsa-mir-1283-2_0		0.284161	9	4	3	3		0.198083	9	7	4	2		0.37274	9	5	2	4		1	7	8	3	2		0.830356	6	8	3	2		0.834597	7	8	2	3		0.190061	6	7	2	6		0.716458	7	5	4	5
hsa-mir-1284_0		0.39231	1	2	15	10		1	5	7	6	4		0.869131	1	1	13	15		0.281852	5	4	6	4		0.323095	3	0	11	12		0.347475	1	0	15	12		0.0913074	2	2	14	7		0.560417	2	1	10	11
hsa-mir-1285-1_0		0.222947	10	8	4	1		0.0930077	8	8	4	3		0.0865829	6	12	5	1		0.914616	8	6	4	3		0.220183	6	11	4	1		0.850578	8	10	4	3		0.814173	10	12	2	1		0.265227	13	7	2	3
hsa-mir-1285-2_0		0.754622	9	6	1	1		0.501162	5	7	8	5		0.11591	10	5	1	0		0.525602	5	4	7	6		0.525602	8	6	1	0		0.746988	6	8	1	0		1	6	5	1	1		0.389626	7	5	1	0	High
hsa-mir-1286_0		0.366959	7	3	5	7		0.653158	10	8	3	2		0.643797	5	7	8	5		0.150231	9	9	3	2		0.688179	4	6	8	6		0.734204	5	6	8	5		0.622449	3	6	7	6		0.727876	6	5	5	8
hsa-mir-1287_0		0.290123	3	4	9	4		0.119124	9	6	3	3		0.331079	2	6	9	6		0.728163	6	8	5	2		0.393521	1	4	9	6		0.40137	1	4	10	7		0.531357	2	4	6	8		0.531013	2	5	7	5
hsa-mir-1288_0		0.166629	4	2	12	8		0.328148	8	8	4	3		0.690288	2	3	11	8		0.629118	8	7	4	3		0.476082	4	1	7	9		0.52538	4	3	11	8		1	5	4	6	7		0.0525216	2	4	10	3
hsa-mir-1289-1_0		0.754622	15	12	1	1		0.898213	6	7	6	5		0.746988	14	16	1	0		1	5	5	6	4		0.509788	14	17	1	0		0.371422	16	12	2	1		0.321245	15	16	0	2		0.624099	15	11	1	2
hsa-mir-1289-2_0		0.496613	4	3	7	4	Low	0.0299394	8	8	3	2		0.352117	5	5	3	7		1	8	7	3	2		0.104954	6	2	6	3		1	5	4	5	6		0.602641	4	4	7	4		0.751827	2	4	5	6
hsa-mir-1290_0		0.80915	3	1	7	8		0.399207	6	7	4	3		0.431812	1	3	8	5		1	4	5	4	3		0.803697	2	1	7	6		0.894298	2	2	7	5		0.672829	2	2	5	8		0.779986	2	1	4	6
hsa-mir-1291_0		0.220351	9	5	4	2		0.704511	9	8	4	2		0.139266	3	9	4	2		0.734204	8	8	3	3		0.400111	8	4	4	4		0.672829	5	8	3	2		1	7	7	3	3	High	0.0137198	8	3	0	6
hsa-mir-129-1_0		0.164593	7	5	6	2		0.165576	9	8	3	2		1	7	8	5	4		1	8	7	3	2		0.823831	5	7	3	2		1	8	8	4	4		1	9	8	2	2		0.139401	10	5	4	4
hsa-mir-1292_0		1	7	7	5	6		0.580232	10	8	3	2		0.858442	8	9	4	5		0.19964	9	9	3	2		0.857609	8	7	4	6		0.218118	10	5	5	5		0.473539	8	7	4	8		0.674014	7	9	5	5
hsa-mir-129-2_0		1	3	3	6	6		0.310627	8	8	4	2		0.662564	5	3	5	7		0.697309	8	8	3	2		0.44569	7	3	3	5		0.335516	6	2	5	7		0.840143	5	3	5	6		0.924365	4	6	5	5
hsa-mir-1293_0		0.112295	10	4	3	2		0.379034	7	8	4	2		0.339299	3	7	4	2		0.617622	8	6	3	3		0.602641	7	4	4	4		0.823831	5	7	3	2		1	6	7	3	2	High	0.0122774	8	2	0	5
hsa-mir-1294_0		0.763244	6	6	4	2		0.225319	8	7	4	2		0.36651	7	8	2	5		1	6	7	3	2		0.898213	8	6	2	2		1	7	7	2	3		0.554683	8	5	3	2		0.537249	4	8	3	2
hsa-mir-1295_0		0.0657805	13	8	2	0		0.452256	6	7	7	4		1	10	11	1	0		0.39231	5	5	5	5		0.594873	8	9	2	0		0.814173	10	9	2	1		0.762554	13	10	1	1		0.535683	8	10	2	0
hsa-mir-1296_0		0.215329	3	5	8	3	Ambiguous	0.00261671	10	8	3	2		0.722122	4	5	5	7		1	9	9	3	2		0.679992	4	6	7	5		0.714739	4	3	9	7		0.850374	4	5	7	5		0.657466	6	4	5	6
hsa-mir-1297_0		0.620481	2	1	15	13		0.858329	5	7	7	3		0.234308	0	3	17	13		0.169284	4	6	6	5		0.494096	1	2	15	11		1	1	2	14	13		0.73281	1	3	14	12		0.240057	3	0	10	12
hsa-mir-1299_0		0.129331	4	0	6	6	Ambiguous	0.0492985	8	7	5	3		0.351711	2	4	3	6	Low	0.0148811	6	8	4	2		0.224877	3	1	8	4		0.570254	5	2	5	5		0.754431	2	4	5	5		0.14415	5	3	7	3
hsa-mir-1300_0		0.89679	3	3	3	5		0.889572	5	8	4	3		0.741974	4	4	4	2		1	5	4	6	3		0.166615	4	1	6	3		0.256426	3	1	5	2		0.580769	1	2	6	3		0.66621	4	2	2	2
hsa-mir-1301_0		0.80915	8	7	2	1		1	5	7	8	5		0.331889	9	5	0	1		0.75967	5	4	7	5		0.754622	8	7	1	0		1	7	6	1	1		0.746988	6	7	0	1		0.338739	7	6	2	0	High
hsa-mir-1302-1_0	Ambiguous	0.0171054	10	6	4	0		1	8	7	5	3		0.898213	8	6	2	2		0.687572	5	7	4	3	High	0.0171424	10	2	1	3		1	6	7	2	2		0.389583	8	5	4	2		0.729433	7	6	1	3
hsa-mir-1302-2_0		1	0	0	0	0		1	0	2	15	10		1	0	0	0	0		1	0	0	12	11		1	0	0	0	0		1	0	0	0	0		1	0	0	0	0		1	0	0	0	0
hsa-mir-1302-2_1		1	0	0	0	0		1	0	2	15	10		1	0	0	0	0		1	0	0	12	11		1	0	0	0	0		1	0	0	0	0		1	0	0	0	0		1	0	0	0	0
hsa-mir-1302-2_2		1	0	0	0	0		1	0	2	15	10		1	0	0	0	0		1	0	0	12	11		1	0	0	0	0		1	0	0	0	0		1	0	0	0	0		1	0	0	0	0
hsa-mir-1302-2_3		1	0	0	0	0		1	0	2	15	10		1	0	0	0	0		1	0	0	12	11		1	0	0	0	0		1	0	0	0	0		1	0	0	0	0		1	0	0	0	0
hsa-mir-1302-3_0		0.869131	8	6	1	1		0.0786946	6	7	7	4		0.754622	9	7	0	1		0.202747	5	5	5	5		0.0786946	10	5	2	0		0.0635327	11	4	1	2		0.229855	10	6	0	2		1	7	8	1	0
hsa-mir-1302-4_0		0.355558	7	3	2	2		0.179725	6	7	5	4		0.60406	4	7	2	1		0.0606952	6	6	5	4		0.795644	7	5	1	2		0.184461	7	5	0	4		0.180178	5	7	0	3		0.0747616	6	5	4	0	High
hsa-mir-1302-5_0		0.494096	15	11	1	2		0.714634	6	7	6	3		0.65538	13	15	2	0		1	5	5	5	5		0.302943	12	16	2	0		0.483069	15	12	2	1		1	14	13	1	2		0.867369	14	12	1	1
hsa-mir-1302-6_0		0.383827	16	11	1	2		0.706169	7	7	7	3		0.80915	12	13	1	2		0.795644	5	6	6	3		0.483069	15	12	2	1		0.248869	17	12	1	1		0.284464	15	10	2	2		0.327371	15	10	1	3
hsa-mir-1302-7_0		0.467214	16	13	2	1		0.66866	8	8	6	3		0.0582898	17	11	0	4		0.0541274	6	7	5	4		0.620481	15	13	2	1		0.201215	16	13	3	1		0.315163	17	12	1	3		0.369977	17	15	0	3
hsa-mir-1302-8_0		0.619902	4	2	4	6		0.410253	10	7	4	2		0.619902	4	2	4	6		0.0510479	8	9	3	2		0.510746	4	3	8	5		0.502989	6	3	5	4		0.268334	2	6	5	5		0.248309	6	4	6	3
hsa-mir-1303_0		0.763244	6	6	4	2		0.225319	8	7	4	2		0.36651	7	8	2	5		1	6	7	3	2		0.898213	8	6	2	2		1	7	7	2	3		0.554683	8	5	3	2		0.537249	4	8	3	2
hsa-mir-1304_0		0.504769	4	7	5	3		0.193432	7	7	5	2		0.140294	3	8	6	2	Ambiguous	0.0163635	9	7	3	2		0.510746	5	8	3	4		0.577194	4	7	3	3		1	5	6	3	3		0.89195	6	5	2	2
hsa-mir-1305_0		0.460351	3	1	11	10		0.433839	4	6	7	5		0.218321	2	1	12	7		0.29453	5	4	7	5		0.130844	0	1	14	8		0.0748246	0	4	13	7		0.218321	1	2	14	8		0.674961	1	1	7	12
hsa-mir-1306_0		0.366959	7	3	5	7		0.653158	10	8	3	2		0.643797	5	7	8	5		0.150231	9	9	3	2		0.688179	4	6	8	6		0.734204	5	6	8	5		0.622449	3	6	7	6		0.727876	6	5	5	8
hsa-mir-1307_0		0.316536	4	5	9	4		0.0620589	8	7	3	2		0.465675	3	6	9	6		0.641866	7	8	3	2		0.496722	2	4	9	6		0.50419	2	4	10	7		0.845624	4	3	6	8		0.250105	2	7	7	5
hsa-mir-130a_0		0.906577	3	5	4	4		0.316245	10	8	3	2		0.483557	5	3	3	6		0.0887033	9	8	3	2		1	5	5	4	4		0.674888	3	6	4	3		0.674888	5	4	4	2		0.766709	5	4	3	6
hsa-mir-130b_0		0.613602	6	3	5	7		0.656324	10	8	3	2		0.856879	5	6	7	5		0.0637212	9	9	3	2		0.479844	3	5	9	5		0.722122	4	5	8	5		0.528101	3	6	6	6		0.920075	5	5	5	7
hsa-mir-132_0		0.464602	4	2	11	9		0.564438	8	8	4	3		0.569621	3	2	11	8		0.131907	7	7	4	3		0.323256	3	1	6	10		0.774896	4	2	9	9		0.529599	5	3	6	9		0.218995	1	4	9	5
hsa-mir-1322_0		0.620481	1	2	16	13		0.701973	6	7	6	4		1	1	1	15	14		0.360198	6	6	5	5		0.234308	3	0	13	17		0.60406	2	1	16	14		0.141084	4	0	13	14		0.282513	1	3	10	15
hsa-mir-1323_0		0.284161	9	4	3	3		0.198083	9	7	4	2		0.37274	9	5	2	4		1	7	8	3	2		0.830356	6	8	3	2		0.834597	7	8	2	3		0.190061	6	7	2	6		0.716458	7	5	4	5
hsa-mir-1324_0		0.501076	1	2	14	10		1	4	6	8	5		0.872767	1	1	12	14		0.0689935	4	4	8	6		0.762554	1	0	12	11		0.357977	0	0	15	11	Low	0.0165142	1	2	15	6		0.437821	1	0	10	11
hsa-mir-133a-1_0		0.703122	4	3	5	8		0.737188	7	8	5	2		0.619902	2	4	6	4		0.703122	7	8	4	3		0.754431	4	2	5	5		0.703122	3	4	5	7		0.333661	1	3	5	8		0.0626902	0	3	9	4
hsa-mir-133a-2_0		0.643832	13	10	1	2		1	6	7	6	3		0.433372	12	12	2	0		0.754622	5	5	5	5		0.454442	13	16	2	0		0.206589	15	10	2	1		0.80915	14	12	1	2		1	13	12	1	1
hsa-mir-133b_0		0.519811	4	3	9	6		0.125142	9	8	3	2		0.4348	5	5	9	5		0.300409	9	8	3	2		0.916874	4	4	7	5		0.712257	4	5	7	4		0.602641	4	4	7	4		1	5	6	6	8
hsa-mir-134_0		1	8	8	4	3		0.821458	7	7	3	3		0.393521	6	9	4	1		0.336168	8	7	3	2		1	7	7	2	3		0.920894	9	7	4	4		0.436987	6	9	5	2		0.162158	10	6	3	2
hsa-mir-135a-1_0		0.357977	0	1	15	11		0.530829	4	6	9	5		0.525602	0	0	13	16		0.357977	4	4	8	7		1	0	0	13	12		0.124264	0	0	16	10		0.0689935	0	1	15	8		0.420437	1	0	11	12
hsa-mir-135a-2_0		0.161856	10	5	2	1		1	8	7	6	4		1	7	7	1	2		0.260734	5	7	6	3	High	0.0117255	9	2	0	3		1	6	5	1	1		0.672829	8	5	2	3		0.375118	8	5	1	3
hsa-mir-135b_0		0.504461	11	8	2	1		1	6	7	6	4		0.643832	8	10	1	2		0.0718028	6	6	5	4		0.317666	9	7	0	3		0.812543	10	8	1	2		0.119069	12	8	0	4		0.195554	8	11	0	2
hsa-mir-136_0		1	8	8	4	3		0.821458	7	7	3	3		0.393521	6	9	4	1		0.336168	8	7	3	2		1	7	7	2	3		0.920894	9	7	4	4		0.436987	6	9	5	2		0.162158	10	6	3	2
hsa-mir-137_0		0.228938	9	4	4	4		0.908539	10	8	3	2		0.918386	6	4	5	5		0.20997	8	8	3	2		0.108349	8	5	6	2		0.117458	8	3	5	3		0.0667053	9	2	4	7		0.602193	7	4	4	5
hsa-mir-138-1_0		0.397253	2	1	13	9		0.218133	7	7	6	4		1	2	1	12	13		0.144864	7	6	5	5		0.172869	3	0	11	10	Ambiguous	0.0368181	3	0	13	9		0.112299	3	1	13	8	High	0.0416205	4	0	9	12
hsa-mir-138-2_0		0.919456	8	6	4	4		0.52397	8	8	4	2		0.836994	8	10	3	2		0.834597	7	7	4	3	High	0.0473586	12	5	2	1		1	7	7	4	3		0.830356	6	7	2	3		0.301997	7	7	4	1
hsa-mir-139_0		0.554683	5	8	2	3		0.171055	7	8	7	3		0.681917	6	8	2	3		0.639506	6	7	4	3		0.645239	12	9	1	2		1	8	8	3	2		0.332591	10	6	3	2		0.400439	11	8	1	3
hsa-mir-140_0		0.519811	9	6	4	3		0.831328	8	7	4	2		1	10	9	2	2		0.408563	6	7	4	3	High	0.0473586	12	5	2	1		0.834597	7	8	4	2		0.830356	8	6	2	3		0.24354	8	7	4	1
hsa-mir-141_0		0.489831	4	6	8	4		0.0529326	10	7	3	2	Low	0.00596103	1	10	8	3		0.633524	8	9	3	2		0.285554	3	6	7	9		0.174957	2	7	8	5		1	5	6	7	7		0.602193	7	4	4	5
hsa-mir-142_0		0.494096	10	6	1	2		0.72721	6	8	7	3		0.333661	8	5	3	1		0.80915	6	5	4	4		0.80915	9	6	2	2	Ambiguous	0.0467931	10	6	3	0		0.639506	9	7	2	1		0.33645	5	7	0	2
hsa-mir-143_0		1	5	6	3	2		0.413818	7	7	5	2		0.531357	6	8	2	4		1	6	6	3	2		0.894298	7	5	2	2		1	6	6	2	3		0.54196	7	4	3	2		0.392309	3	7	2	2
hsa-mir-144_0		0.166342	7	2	3	3		0.732187	8	7	4	3		0.132628	8	2	2	3		0.0581161	6	7	4	4		0.0591988	6	1	4	2		0.188714	7	2	3	5		0.412476	7	4	1	3		0.421445	5	4	1	4
hsa-mir-145_0		1	5	6	3	2		0.413818	7	7	5	2		0.531357	6	8	2	4		1	6	6	3	2		0.894298	7	5	2	2		1	6	6	2	3		0.54196	7	4	3	2		0.392309	3	7	2	2
hsa-mir-1469_0		0.359207	6	4	6	3		0.581338	8	9	4	2		0.347848	8	4	4	3		1	8	7	3	3		0.0589024	9	2	3	5		0.916874	7	5	4	4		0.840143	4	3	6	5		0.884493	4	5	2	1
hsa-mir-146a_0		0.175966	6	8	6	1	Ambiguous	0.037789	8	7	4	2		0.539348	7	9	2	4		1	8	7	3	2		0.531357	8	6	4	2		0.84898	7	8	3	4		0.563166	9	6	3	2		0.698264	6	8	4	2
hsa-mir-146b_0		0.27248	3	5	9	4	High	0.0437786	7	6	3	3		0.331079	2	6	9	6		0.728163	7	7	5	2		0.393521	1	4	9	6		0.40137	1	4	10	7		0.911785	3	3	6	8		0.376891	2	6	7	5
hsa-mir-147_0		0.906577	5	3	4	4		0.587653	10	8	4	2		0.507972	3	5	3	5	Low	0.0495423	8	9	3	2		0.921934	5	5	7	5		0.521525	7	4	5	4	Low	0.0323963	2	8	3	5		0.270068	8	6	6	3
hsa-mir-1470_0		0.714739	4	3	7	10		0.640947	9	7	3	3		0.77307	4	2	8	8		0.239528	7	7	5	2		0.258739	5	1	7	7	High	0.0161268	7	0	5	7		0.331079	6	2	6	9		0.320782	5	2	7	7
hsa-mir-1471_0		0.159723	6	3	0	3		0.229537	6	7	6	4		0.569678	5	6	2	0		0.589218	5	5	4	5		0.321245	7	4	0	2		0.894298	7	5	2	2		1	5	6	2	1		0.650933	5	6	3	1	High
hsa-mir-147b_0		1	2	2	6	7		1	8	9	4	3		0.674888	3	4	6	3		1	5	8	6	3		0.0739935	5	1	7	4	Ambiguous	0.0412941	4	1	7	2		0.431812	1	3	8	5		0.892875	3	3	4	3
hsa-mir-148a_0		0.483069	16	12	1	2		0.706169	7	7	7	3		0.631932	12	14	1	2		1	5	6	6	3		0.620481	15	13	2	1		0.400312	17	13	1	1		0.284464	15	10	2	2		0.333661	15	11	1	3
hsa-mir-148b_0	High	0.0202199	13	6	2	0		0.617959	8	7	4	3		0.631932	6	8	1	2		0.687572	5	6	3	4		0.269863	9	4	2	2		0.898213	6	8	2	2		1	8	9	2	1		0.135561	8	5	0	4
hsa-mir-149_0	High	0.0451142	6	1	1	5		0.269833	7	8	5	3		1	5	5	2	3		0.110367	8	6	4	3		0.145474	5	4	0	4		0.703122	5	7	3	4		0.640054	3	6	3	2		1	4	5	3	2	High
hsa-mir-150_0		0.118726	8	3	6	4		0.2113	9	8	3	2		0.375872	8	4	3	6		0.703122	9	9	3	2		0.44401	6	5	6	3		1	6	6	4	4		0.443697	5	4	4	8		0.385	6	3	5	5
hsa-mir-151_0		0.620481	15	13	2	1		0.505259	8	8	6	3	High	0.0307763	17	10	0	4	Low	0.0261548	6	7	5	4		0.483069	15	12	2	1		0.102612	16	12	3	1		0.224877	17	11	1	3		0.369977	17	15	0	3
hsa-mir-152_0		0.0617784	12	5	0	0		0.537488	6	7	9	5		0.75967	9	8	1	0		0.11591	5	5	7	6		0.11591	11	5	0	1		0.066585	12	6	1	0		0.543374	10	8	1	0		0.430177	6	9	0	1
hsa-mir-153-1_0		0.548774	5	3	1	3		0.207344	6	7	7	4		0.60406	4	6	1	2		0.252141	6	5	6	6		0.720513	6	4	0	1		0.15864	6	5	0	4		0.856022	4	6	1	1		0.636888	5	5	3	1	High
hsa-mir-153-2_0		0.13341	10	5	5	3		0.2633	9	8	3	2		0.465675	6	9	6	3		1	8	9	3	2		0.920894	9	7	4	4		0.288947	9	10	6	2		0.716098	11	8	3	3		0.586386	9	7	3	3
hsa-mir-1537_0		0.213946	13	9	3	1		1	7	7	6	2		0.812543	7	10	2	2		0.814173	7	5	4	4		1	9	10	3	2		0.563588	10	9	3	1		0.814173	12	9	2	2		1	10	11	1	1
hsa-mir-1538_0		0.714739	9	7	4	3		0.831328	8	7	4	2		1	10	9	2	2		0.560678	6	7	4	3		0.0958365	12	6	2	1		0.834597	7	8	4	2		1	8	7	2	3		0.154882	9	7	4	1
hsa-mir-1539_0		0.73895	6	4	8	11		0.069501	8	9	5	2		0.921357	4	4	10	8		0.692736	8	7	3	3		0.210564	7	2	6	9		0.793955	5	3	8	10		0.774896	4	2	9	9		0.360576	1	5	10	9
hsa-mir-154_0		1	8	8	4	3		0.821458	7	7	3	3		0.393521	6	9	4	1		0.336168	8	7	3	2		1	7	7	2	3		0.920894	9	7	4	4		0.436987	6	9	5	2		0.162158	10	6	3	2
hsa-mir-155_0		0.784033	2	1	4	6		0.728361	6	7	7	4		0.383827	2	1	9	5		0.703122	7	5	4	6		0.381404	4	1	5	8		0.518564	4	2	7	5		0.297525	4	1	4	7		0.173308	5	1	4	5
hsa-mir-15a_0		1	2	1	14	14		0.856505	5	6	7	3		0.371422	1	2	17	12		0.474708	5	6	5	5		0.0502085	1	3	17	9		1	2	2	12	12		0.545232	1	3	15	12		0.0830584	4	0	9	14
hsa-mir-15b_0	High	0.0305355	13	5	0	1		0.527254	6	7	7	4		1	9	9	2	1		0.900758	5	5	5	5		1	10	9	1	2		0.812543	10	8	1	2		0.763493	9	12	1	1		0.208858	13	7	1	2
hsa-mir-16-1_0		1	2	1	14	14		0.856505	5	6	7	3		0.371422	1	2	17	12		0.474708	5	6	5	5		0.0502085	1	3	17	9		1	2	2	12	12		0.545232	1	3	15	12		0.0830584	4	0	9	14
hsa-mir-16-2_0	High	0.0305355	13	5	0	1		0.527254	6	7	7	4		1	9	9	2	1		0.900758	5	5	5	5		1	10	9	1	2		0.812543	10	8	1	2		0.763493	9	12	1	1		0.208858	13	7	1	2
hsa-mir-17_0		0.620481	2	1	15	13		1	6	7	4	2		0.246982	1	4	16	11		1	5	6	3	3		0.812543	2	2	13	10		0.563166	2	3	10	13		0.539348	2	4	13	9		1	2	2	9	11
hsa-mir-181a-1_0		0.504461	12	9	2	1		0.504461	6	7	6	4		0.645239	9	11	1	2		0.128697	7	6	5	4		0.169284	8	9	0	3		0.687473	10	9	1	3		0.145884	11	9	0	4		0.636793	9	11	1	2
hsa-mir-181a-2_0		0.906577	5	3	4	4		0.587653	10	8	4	2		0.507972	3	5	3	5	Low	0.0495423	8	9	3	2		0.921934	5	5	7	5		0.521525	7	4	5	4	Low	0.0323963	2	8	3	5		0.270068	8	6	6	3
hsa-mir-181b-1_0		0.504461	12	9	2	1		0.504461	6	7	6	4		0.645239	9	11	1	2		0.128697	7	6	5	4		0.169284	8	9	0	3		0.687473	10	9	1	3		0.145884	11	9	0	4		0.636793	9	11	1	2
hsa-mir-181b-2_0		0.906577	5	3	4	4		0.587653	10	8	4	2		0.507972	3	5	3	5	Low	0.0495423	8	9	3	2		0.921934	5	5	7	5		0.521525	7	4	5	4	Low	0.0323963	2	8	3	5		0.270068	8	6	6	3
hsa-mir-181c_0		0.40137	4	1	7	10		0.515243	8	8	4	3		1	3	2	8	8		0.381419	7	6	5	4		0.110367	4	0	7	7		0.133664	6	1	5	6		0.204297	5	1	6	9		0.153942	5	1	6	7
hsa-mir-181d_0		0.40137	4	1	7	10		0.515243	8	8	4	3		1	3	2	8	8		0.381419	7	6	5	4		0.110367	4	0	7	7		0.133664	6	1	5	6		0.204297	5	1	6	9		0.153942	5	1	6	7
hsa-mir-182_0		0.130247	9	5	5	2		0.0841969	9	8	3	2		0.677983	7	9	5	3		1	8	7	3	2		0.823831	5	7	3	2		1	9	8	3	4		0.902196	10	8	2	2		0.153324	11	5	3	4
hsa-mir-1825_0		0.869131	15	13	1	1		1	6	7	6	5		0.509788	14	17	0	0		1	5	5	7	4		1	16	17	0	0		0.400312	17	13	1	1		0.494665	16	16	0	2		0.39337	16	12	0	2
hsa-mir-1826_0		0.0726879	8	2	2	5		0.188125	8	7	4	3		0.488037	9	5	2	2	Ambiguous	0.0306952	8	7	4	3	High	0.00634129	11	4	0	6		0.421252	8	4	3	4		0.0803099	7	5	1	7		1	7	8	3	2
hsa-mir-1827_0	High	0.0397246	11	5	2	0		1	8	7	6	4		1	7	7	1	2		0.311607	4	6	6	3	High	0.008844	10	2	0	2		0.863763	7	5	1	1		0.488037	9	5	2	2		0.126593	9	5	0	3
hsa-mir-183_0		0.130247	9	5	5	2		0.0841969	9	8	3	2		0.677983	7	9	5	3		1	8	7	3	2		0.823831	5	7	3	2		1	9	8	3	4		0.902196	10	8	2	2		0.153324	11	5	3	4
hsa-mir-184_0		0.502989	5	4	6	3		0.662228	7	9	4	2		0.831839	6	4	3	4		0.580717	8	7	3	3		0.24729	7	2	3	4		1	5	5	3	4		0.903908	3	3	6	4		0.58411	3	3	3	1
hsa-mir-185_0		0.366959	7	3	5	7		0.653158	10	8	3	2		0.643797	5	7	8	5		0.150231	9	9	3	2		0.688179	4	6	8	6		0.734204	5	6	8	5		0.622449	3	6	7	6		0.727876	6	5	5	8
hsa-mir-186_0		0.44569	7	3	3	5		0.910729	9	8	3	2		1	3	3	4	3		0.912805	7	6	3	2		0.814222	5	4	3	2		0.417289	6	2	4	4		0.313614	6	2	2	4		0.362119	6	2	3	4
hsa-mir-187_0		0.716098	4	3	8	11		0.175211	8	8	5	2		1	2	3	9	8		1	7	7	3	3		0.196451	6	2	8	7		1	4	3	8	9		1	2	2	9	9		0.0559434	0	3	11	6
hsa-mir-18a_0		0.620481	2	1	15	13		1	6	7	4	2		0.246982	1	4	16	11		1	5	6	3	3		0.812543	2	2	13	10		0.563166	2	3	10	13		0.539348	2	4	13	9		1	2	2	9	11
hsa-mir-190_0		0.814222	5	4	3	2		1	6	7	5	3		0.60406	6	4	2	1		0.659406	5	6	3	3		0.0959923	7	2	4	2		0.650053	4	3	4	2		1	2	3	4	3		0.862644	3	3	2	1
hsa-mir-1908_0		0.178242	1	6	4	3		0.552494	9	8	4	3		0.507972	3	5	3	5		0.24729	7	7	4	2		0.460167	6	6	1	4		0.659406	4	6	2	3		1	5	6	2	2		1	5	6	3	3
hsa-mir-1909_0		0.209468	5	1	7	10		0.291723	9	8	3	3		0.607497	4	2	10	9		0.239528	7	7	4	3		0.095098	4	0	7	11		0.247557	6	2	5	9		0.476082	4	1	7	9	Ambiguous	0.0465351	5	2	9	5
hsa-mir-190b_0		0.0546139	18	11	0	0		0.357977	6	7	9	5		0.75967	14	12	0	0		0.223143	5	5	7	6		0.357977	14	11	1	0		0.156342	16	10	1	1		0.103992	18	12	0	0		0.526506	14	11	1	0
hsa-mir-191_0		0.364044	0	1	14	10		0.208805	4	6	7	5		0.75967	1	0	12	14		0.543374	4	4	8	5		0.762554	1	0	12	11	Low	0.0328649	1	0	15	8		0.0914847	1	1	14	7		0.220672	2	0	10	12
hsa-mir-1910_0		0.850374	6	5	5	4		0.496613	8	7	3	2		0.654411	7	9	4	2		0.703122	8	8	3	2		0.830356	7	6	3	2		1	5	6	5	4		0.431318	4	8	3	3		0.818738	5	6	4	2
hsa-mir-1913_0		0.0667242	4	2	7	15		1	5	7	4	3		0.83777	2	3	9	10		0.277653	7	5	4	4		0.242037	1	3	9	12		0.83777	2	3	9	10		0.621282	3	1	11	11		1	2	2	9	11
hsa-mir-1914_0		0.875029	13	11	1	1		0.720935	6	7	7	5		1	13	14	1	0		0.525602	5	5	6	5		0.525602	13	16	1	0		0.483069	15	12	2	1		0.426965	13	13	0	2		0.867369	14	12	1	1
hsa-mir-1915_0		0.73104	5	4	10	8		0.518554	10	9	3	2		0.857609	5	4	10	9		0.692736	9	8	3	3		0.220506	7	3	9	8		0.28562	6	3	10	8		0.156838	6	1	8	10		0.782944	6	5	5	7
hsa-mir-192_0		0.674888	3	6	4	3		0.172067	9	8	4	3		0.712257	5	6	3	5		0.691704	7	7	4	2		0.393521	9	6	1	4		1	7	6	2	3		0.898213	8	6	2	2		0.406962	9	6	3	3
hsa-mir-193a_0		0.166342	7	2	3	3		0.434192	8	8	4	3		0.377362	6	2	3	3		0.132628	7	8	5	3		0.130014	6	1	3	3		0.09842	7	1	3	5		0.577194	7	4	3	3		0.0586115	4	4	0	5
hsa-mir-193b_0	High	0.00798204	10	1	4	6		0.327466	10	9	3	3		0.519811	9	6	4	3		0.436823	8	8	4	3		0.0845481	9	6	1	7		0.0805345	10	3	4	6		0.0815714	6	5	1	7		0.608598	7	7	6	4
hsa-mir-194-1_0		0.112299	13	8	3	1		1	8	8	5	2		0.606069	8	9	2	4		0.397253	7	7	3	3		0.836994	10	8	2	3		0.690288	11	8	2	3		0.539348	13	9	2	4		0.447755	10	11	1	3
hsa-mir-194-2_0		0.674888	3	6	4	3		0.172067	9	8	4	3		0.712257	5	6	3	5		0.691704	7	7	4	2		0.393521	9	6	1	4		1	7	6	2	3		0.898213	8	6	2	2		0.406962	9	6	3	3
hsa-mir-195_0		0.690288	2	3	12	9		0.300446	7	7	4	2		0.645239	1	2	12	9		0.567462	7	6	4	3		0.174498	3	2	5	11		0.479121	4	1	9	11		0.23711	4	4	5	10		0.267325	2	2	9	5
hsa-mir-196a-1_0		0.11591	11	5	0	0		0.537488	6	7	9	5		0.75967	9	8	1	0		0.11591	5	5	7	6		0.202747	10	5	0	1		0.124264	11	6	1	0		0.75967	9	8	1	0		0.260638	5	9	0	1
hsa-mir-196a-2_0	High	0.0454314	13	7	2	0		0.754578	8	7	4	3		0.631932	6	8	1	2		0.568034	5	6	3	4		0.488037	9	5	2	2		0.898213	6	8	2	2		1	8	9	2	1		0.0819404	9	5	0	4
hsa-mir-196b_0		0.383827	16	11	1	2		0.706169	7	7	7	3		0.80915	12	13	1	2		0.795644	5	6	6	3		0.483069	15	12	2	1		0.248869	17	12	1	1		0.284464	15	10	2	2		0.327371	15	10	1	3
hsa-mir-197_0		0.446858	5	2	4	3	Low	0.0358242	7	7	5	2		0.273597	1	3	7	3		0.627553	6	7	3	4		0.468137	2	4	7	4		0.330689	2	3	6	2		0.714366	3	1	5	5		0.366611	4	1	4	5
hsa-mir-1972_0	High	0.00323961	10	1	6	6		0.533221	10	8	3	3		0.627483	9	6	4	4		0.228938	7	9	4	2		0.0739481	9	5	1	7	High	0.0281686	10	2	4	6		0.471699	6	4	3	7		0.784288	6	7	7	5
hsa-mir-1972_1		0.519811	9	6	4	3		0.831328	8	7	4	2		1	10	9	2	2		0.408563	6	7	4	3	High	0.0473586	12	5	2	1		0.834597	7	8	4	2		0.830356	8	6	2	3		0.24354	8	7	4	1
hsa-mir-1973_0		0.763493	1	0	11	10		0.42694	4	6	9	5		1	0	1	10	10		0.598169	4	4	8	7		1	0	0	9	10		1	0	1	9	8		0.763493	0	1	10	11		0.273599	1	0	6	12
hsa-mir-1974_0		0.602641	4	4	7	4		0.0770308	9	8	3	2		0.712257	5	4	4	7		0.912805	7	9	3	2		0.232436	6	2	5	4		0.596246	5	2	6	7		0.602641	4	4	7	4		1	3	4	6	7
hsa-mir-1975_0		0.0787665	12	5	3	3		0.160434	9	8	3	2		0.84898	7	9	4	3		1	8	7	3	2		1	9	8	3	3		0.50419	11	10	4	2		0.505802	12	8	2	2		0.289419	11	6	3	3
hsa-mir-1976_0		0.65538	2	0	7	7		0.512256	4	7	6	4		0.17833	2	0	8	5		0.554683	7	4	5	5		0.180178	3	0	7	5		0.472835	3	1	7	5		0.238565	3	0	5	7		0.291379	2	0	3	6
hsa-mir-1977_0		0.834597	3	2	8	7		0.667013	8	7	5	2		0.554683	2	3	9	5		1	6	6	3	4		0.898213	2	2	6	8		0.672829	2	3	5	7		0.554683	3	2	5	9		0.441364	1	3	4	6
hsa-mir-1978_0		1	3	4	3	3		0.201634	9	7	4	3		0.412476	7	4	1	3		0.139266	7	9	4	2	Ambiguous	0.0230783	7	3	4	0		0.266612	8	3	2	4		0.408699	7	3	3	3		0.686034	4	7	3	3
hsa-mir-1979_0		0.413638	3	1	10	8		0.610964	4	7	6	4		0.408563	3	1	9	7		1	5	4	5	5		0.206589	1	2	11	5		0.150324	0	4	9	6		0.902196	2	2	10	8		0.0645938	2	1	3	11
hsa-mir-198_0		0.0521651	9	3	0	2		0.158308	7	7	5	2		1	6	7	2	2		1	8	6	3	4		1	6	5	3	3		0.814222	4	6	3	2		1	7	7	1	2		0.0865521	9	3	1	4
hsa-mir-199a-1_0		0.50419	4	2	7	10		0.763725	8	8	3	3		0.77307	4	2	8	8		0.153917	7	6	5	3		0.0606952	5	0	7	7		0.0815714	7	1	5	6		0.150267	6	1	6	9		0.451232	5	2	6	7
hsa-mir-199a-2_0		0.0820836	13	9	2	0		0.454355	6	7	7	4		0.763493	10	12	1	0		0.501076	5	5	5	5		0.433372	8	10	2	0		1	10	10	2	1		0.875029	13	11	1	1		0.324338	8	11	2	0
hsa-mir-199b_0		0.44569	7	3	3	5		1	8	9	4	2		0.912805	4	6	4	4		0.204165	8	8	3	3		0.459159	5	6	8	4		0.722122	7	6	5	3		0.101175	2	8	4	4	Low	0.010746	9	7	7	1
hsa-mir-19a_0		0.620481	2	1	15	13		1	6	7	4	2		0.246982	1	4	16	11		1	5	6	3	3		0.812543	2	2	13	10		0.563166	2	3	10	13		0.539348	2	4	13	9		1	2	2	9	11
hsa-mir-19b-1_0		0.620481	2	1	15	13		1	6	7	4	2		0.246982	1	4	16	11		1	5	6	3	3		0.812543	2	2	13	10		0.563166	2	3	10	13		0.539348	2	4	13	9		1	2	2	9	11
hsa-mir-200a_0		0.687572	3	2	9	7		0.434286	8	8	5	2		0.447383	3	3	9	5		0.790249	6	7	3	4		0.898213	2	2	6	8		0.830356	2	3	6	7		0.292936	3	3	5	10		0.22712	1	4	4	7
hsa-mir-200b_0		0.687572	3	2	9	7		0.434286	8	8	5	2		0.447383	3	3	9	5		0.790249	6	7	3	4		0.898213	2	2	6	8		0.830356	2	3	6	7		0.292936	3	3	5	10		0.22712	1	4	4	7
hsa-mir-200c_0		0.489831	4	6	8	4		0.0529326	10	7	3	2	Low	0.00596103	1	10	8	3		0.633524	8	9	3	2		0.285554	3	6	7	9		0.174957	2	7	8	5		1	5	6	7	7		0.602193	7	4	4	5
hsa-mir-202_0		0.176181	4	4	8	3		0.0794191	8	8	4	3		0.489831	4	6	8	4		0.722122	6	7	4	3		0.446535	1	4	6	5		0.585676	2	5	7	5		0.411791	2	5	5	6		0.177718	1	5	8	4
hsa-mir-203_0		0.793046	8	8	5	3		1	8	8	3	3		0.120761	5	8	6	1		0.220183	8	7	3	3		0.830356	8	6	2	3		0.728163	8	6	5	4		0.175966	6	8	6	1		0.221954	10	5	2	4
hsa-mir-204_0		0.312416	5	1	5	6		0.321398	9	8	3	2		1	3	3	6	6		0.0915543	7	9	3	2		0.284161	3	3	9	4		0.268334	6	2	5	5		0.268334	2	6	5	5		0.226386	7	3	5	4
hsa-mir-205_0		0.669641	12	8	1	1		1	6	7	6	4		0.643832	8	10	1	2		0.0617784	6	6	5	4		0.615755	9	7	1	3		0.639506	10	7	1	2		0.242037	12	7	1	3		0.31499	9	11	0	2
hsa-mir-2052_0		0.393521	12	12	4	1		0.496902	9	7	3	3		0.0756582	15	8	1	5		0.21416	8	7	3	2		0.181879	12	9	5	2		0.175893	13	9	5	3	High	0.00395717	18	7	2	6		0.585676	13	11	2	5
hsa-mir-2053_0		0.297525	14	14	4	1		0.341316	8	8	4	3		0.0739935	17	10	1	5		0.124162	7	7	5	3		0.141084	13	14	4	0		0.295344	15	13	3	1	High	0.00712982	19	10	2	4		0.341832	17	14	1	3
hsa-mir-2054_0		0.643832	2	1	12	10		0.740292	4	6	8	4		1	2	2	10	9		0.413638	5	5	7	6		0.543374	0	1	11	8		0.095098	0	4	11	7		0.26947	0	3	12	9		0.516677	1	1	6	12
hsa-mir-206_0		0.519811	4	3	9	6		0.125142	9	8	3	2		0.4348	5	5	9	5		0.300409	9	8	3	2		0.916874	4	4	7	5		0.712257	4	5	7	4		0.602641	4	4	7	4		1	5	6	6	8
hsa-mir-208a_0		1	8	8	3	2		0.257218	9	7	4	2		0.834597	7	8	4	2		0.836994	6	8	3	2		0.902196	8	10	2	2		0.654411	9	7	2	4		0.836994	8	9	2	3		0.125529	12	6	3	5
hsa-mir-208b_0		1	8	8	3	2		0.257218	9	7	4	2		0.834597	7	8	4	2		0.836994	6	8	3	2		0.902196	8	10	2	2		0.654411	9	7	2	4		0.836994	8	9	2	3		0.125529	12	6	3	5
hsa-mir-20a_0		0.620481	2	1	15	13		1	6	7	4	2		0.246982	1	4	16	11		1	5	6	3	3		0.812543	2	2	13	10		0.563166	2	3	10	13		0.539348	2	4	13	9		1	2	2	9	11
hsa-mir-21_0		1	10	9	1	1		0.646809	6	8	8	3		0.209114	8	7	3	0		0.639506	6	5	5	5		0.126291	9	7	3	0		0.117672	11	7	2	0		0.643832	10	8	2	1		0.576691	4	8	1	1
hsa-mir-210_0		0.830356	2	3	6	7		0.924131	7	8	5	2		0.206116	2	4	4	8		1	7	6	4	3		0.234669	6	2	4	8		0.311607	3	1	5	9		0.426772	5	2	5	8		0.150116	1	6	8	5
hsa-mir-211_0		0.63601	2	4	7	5		1	7	9	4	2		0.843049	4	5	6	4		0.903908	7	7	3	3		0.518564	4	2	7	5		0.351711	4	2	6	3		0.284161	3	3	9	4		0.28674	1	5	4	3
hsa-mir-2110_0		0.216697	1	3	9	4	Low	0.0276874	6	7	5	3		0.476082	1	4	9	7		0.563166	4	5	6	4		1	1	2	7	7		1	1	1	7	8		0.80915	2	2	6	9		0.206298	1	4	8	4
hsa-mir-2113_0		0.606069	5	2	9	11		0.47577	8	8	4	2		0.337849	3	2	11	7		0.372007	8	7	3	3		0.602872	5	2	7	9		0.714739	4	3	9	7		0.218929	4	1	9	7		0.168937	4	2	11	10
hsa-mir-212_0		0.464602	4	2	11	9		0.564438	8	8	4	3		0.569621	3	2	11	8		0.131907	7	7	4	3		0.323256	3	1	6	10		0.774896	4	2	9	9		0.529599	5	3	6	9		0.218995	1	4	9	5
hsa-mir-214_0		0.0820836	13	9	2	0		0.454355	6	7	7	4		0.763493	10	12	1	0		0.501076	5	5	5	5		0.433372	8	10	2	0		1	10	10	2	1		0.875029	13	11	1	1		0.324338	8	11	2	0
hsa-mir-215_0		0.112299	13	8	3	1		1	8	8	5	2		0.606069	8	9	2	4		0.397253	7	7	3	3		0.836994	10	8	2	3		0.690288	11	8	2	3		0.539348	13	9	2	4		0.447755	10	11	1	3
hsa-mir-216a_0		0.869131	8	6	1	1		0.196088	5	7	9	5		0.202747	9	5	1	0		0.536507	5	4	7	7		0.347475	9	6	1	0		1	7	8	1	0		1	7	6	1	1		0.61158	7	6	1	0	High
hsa-mir-216b_0		0.869131	8	6	1	1		0.196088	5	7	9	5		0.202747	9	5	1	0		0.536507	5	4	7	7		0.347475	9	6	1	0		1	7	8	1	0		1	7	6	1	1		0.61158	7	6	1	0	High
hsa-mir-217_0		0.869131	8	6	1	1		0.196088	5	7	9	5		0.202747	9	5	1	0		0.536507	5	4	7	7		0.347475	9	6	1	0		1	7	8	1	0		1	7	6	1	1		0.61158	7	6	1	0	High
hsa-mir-218-1_0		0.620179	5	5	7	4		0.416344	10	8	3	2		0.371663	6	3	4	7		0.803242	9	9	3	2		0.504769	3	5	7	4		0.465881	3	5	8	4		0.674888	3	4	3	5		0.914895	4	3	5	6
hsa-mir-218-2_0		0.120761	5	8	6	1	Ambiguous	0.0242738	8	7	4	2		0.400236	6	9	2	4		0.911785	8	7	3	2		0.703122	7	6	4	2		0.710544	6	8	3	4		0.681917	8	6	3	2		0.760111	6	7	4	2
hsa-mir-219-1_0		0.622449	6	3	6	7		0.769853	10	8	3	2		0.118726	8	3	6	4		0.725685	8	9	3	2		0.359207	6	3	6	4		0.268334	5	5	6	2		0.843049	5	4	5	4		1	5	7	5	5
hsa-mir-219-2_0		0.44569	7	3	3	5		1	8	9	4	2		0.912805	4	6	4	4		0.204165	8	8	3	3		0.459159	5	6	8	4		0.722122	7	6	5	3		0.101175	2	8	4	4	Low	0.010746	9	7	7	1
hsa-mir-22_0		0.464602	4	2	11	9		0.564438	8	8	4	3		0.569621	3	2	11	8		0.131907	7	7	4	3		0.323256	3	1	6	10		0.774896	4	2	9	9		0.529599	5	3	6	9		0.218995	1	4	9	5
hsa-mir-220b_0		0.40137	4	1	7	10		0.366146	9	8	4	3		1	3	2	9	9		0.331079	7	7	5	4		0.142302	4	0	7	9		0.0919925	6	1	5	9		0.140569	4	1	5	11		0.0617793	5	1	8	6
hsa-mir-220c_0		0.126023	7	3	6	3		0.08915	9	7	4	2		0.234669	8	4	2	6		0.421252	9	9	3	2		0.777861	5	5	5	3		1	6	5	4	4		0.300413	5	4	3	8		0.385	6	3	5	5
hsa-mir-23a_0		0.40137	4	1	7	10		0.515243	8	8	4	3		1	3	2	8	8		0.381419	7	6	5	4		0.110367	4	0	7	7		0.133664	6	1	5	6		0.204297	5	1	6	9		0.153942	5	1	6	7
hsa-mir-23b_0		0.275237	5	1	4	6		0.439644	10	8	4	2		0.903908	3	3	4	6		0.0636608	7	9	3	2		0.510746	4	3	8	5		0.120008	7	2	5	4		0.268334	2	6	5	5		0.157735	7	4	6	3
hsa-mir-24-1_0		0.275237	5	1	4	6		0.439644	10	8	4	2		0.903908	3	3	4	6		0.0636608	7	9	3	2		0.510746	4	3	8	5		0.120008	7	2	5	4		0.268334	2	6	5	5		0.157735	7	4	6	3
hsa-mir-24-2_0		0.40137	4	1	7	10		0.515243	8	8	4	3		1	3	2	8	8		0.381419	7	6	5	4		0.110367	4	0	7	7		0.133664	6	1	5	6		0.204297	5	1	6	9		0.153942	5	1	6	7
hsa-mir-25_0		0.27868	10	9	4	1		0.0930077	8	8	4	3		0.105929	7	13	5	1		1	8	6	4	3		0.144721	6	12	4	1		0.716098	8	11	4	3		0.814173	10	12	2	1		0.472947	13	8	2	3
hsa-mir-26a-1_0		0.183152	3	2	12	7		0.49075	7	8	6	3		0.836994	3	2	10	12		0.244924	7	6	5	5		0.130636	3	0	11	9		0.223375	4	1	11	9		0.0500724	3	1	13	7	High	0.0416205	4	0	9	12
hsa-mir-26a-2_0		0.218321	12	7	2	1		0.200417	9	9	4	2		1	7	7	3	3		1	9	7	3	4		0.0616625	11	4	3	3		1	7	7	3	3		0.408563	9	7	3	1		0.16106	7	6	1	6
hsa-mir-26b_0		0.548774	5	3	1	3		0.207344	6	7	7	4		0.60406	4	6	1	2		0.252141	6	5	6	6		0.720513	6	4	0	1		0.15864	6	5	0	4		0.856022	4	6	1	1		0.636888	5	5	3	1	High
hsa-mir-27a_0		0.40137	4	1	7	10		0.515243	8	8	4	3		1	3	2	8	8		0.381419	7	6	5	4		0.110367	4	0	7	7		0.133664	6	1	5	6		0.204297	5	1	6	9		0.153942	5	1	6	7
hsa-mir-27b_0		0.275237	5	1	4	6		0.439644	10	8	4	2		0.903908	3	3	4	6		0.0636608	7	9	3	2		0.510746	4	3	8	5		0.120008	7	2	5	4		0.268334	2	6	5	5		0.157735	7	4	6	3
hsa-mir-28_0	High	0.0348615	13	5	1	2		0.106289	8	9	4	3		1	10	9	3	3		1	7	7	5	4		0.40137	10	7	1	4		0.0961668	12	5	1	4		0.687473	10	9	1	3		0.0601268	13	6	1	3
hsa-mir-296_0		0.643832	13	10	1	2		0.564523	6	7	6	3		0.594873	12	13	2	0		0.754622	5	5	5	5		0.302943	12	16	2	0		0.383827	15	11	2	1		1	13	13	1	2		1	12	12	1	1
hsa-mir-297_0		0.762554	1	0	12	11		0.751808	4	6	9	5		1	0	1	11	10		0.543374	4	4	8	7		0.762554	0	0	11	9		0.762554	0	0	11	9		1	0	1	11	10		0.349887	0	0	7	13
hsa-mir-298_0		0.643832	13	10	1	2		0.564523	6	7	6	3		0.594873	12	13	2	0		0.754622	5	5	5	5		0.302943	12	16	2	0		0.383827	15	11	2	1		1	13	13	1	2		1	12	12	1	1
hsa-mir-299_0		1	8	8	4	3		0.821458	7	7	3	3		0.393521	6	9	4	1		0.336168	8	7	3	2		1	7	7	2	3		0.920894	9	7	4	4		0.436987	6	9	5	2		0.162158	10	6	3	2
hsa-mir-29a_0		0.130247	9	5	5	2		0.0841969	9	8	3	2		0.677983	7	9	5	3		1	8	7	3	2		0.823831	5	7	3	2		1	9	8	3	4		0.902196	10	8	2	2		0.153324	11	5	3	4
hsa-mir-29b-1_0		0.130247	9	5	5	2		0.0841969	9	8	3	2		0.677983	7	9	5	3		1	8	7	3	2		0.823831	5	7	3	2		1	9	8	3	4		0.902196	10	8	2	2		0.153324	11	5	3	4
hsa-mir-29b-2_0		0.254413	12	8	3	1		1	7	7	5	2		0.902196	8	10	2	2		0.0704302	6	7	3	3		0.834597	9	7	2	3		0.812543	10	7	2	2		0.408397	12	7	2	4		0.122078	9	11	0	3
hsa-mir-29c_0		0.254413	12	8	3	1		1	7	7	5	2		0.902196	8	10	2	2		0.0704302	6	7	3	3		0.834597	9	7	2	3		0.812543	10	7	2	2		0.408397	12	7	2	4		0.122078	9	11	0	3
hsa-mir-300_0		1	8	8	4	3		0.821458	7	7	3	3		0.393521	6	9	4	1		0.336168	8	7	3	2		1	7	7	2	3		0.920894	9	7	4	4		0.436987	6	9	5	2		0.162158	10	6	3	2
hsa-mir-301a_0		0.875029	10	8	1	1		0.764539	6	7	8	3		0.302943	8	6	2	0		1	5	5	6	6		0.313869	9	7	2	0		0.223143	11	7	1	0		1	9	8	1	1		0.619265	5	7	0	1
hsa-mir-301b_0		0.613602	6	3	5	7		0.656324	10	8	3	2		0.856879	5	6	7	5		0.0637212	9	9	3	2		0.479844	3	5	9	5		0.722122	4	5	8	5		0.528101	3	6	6	6		0.920075	5	5	5	7
hsa-mir-302a_0		0.762554	1	0	12	11		0.341916	4	6	9	5		1	0	1	11	11		0.543374	4	4	8	7		0.762554	0	0	11	9		0.543374	0	0	11	8		1	0	1	11	10		0.117972	0	0	6	14
hsa-mir-302b_0		0.762554	1	0	12	11		0.341916	4	6	9	5		1	0	1	11	11		0.543374	4	4	8	7		0.762554	0	0	11	9		0.543374	0	0	11	8		1	0	1	11	10		0.117972	0	0	6	14
hsa-mir-302c_0		0.762554	1	0	12	11		0.341916	4	6	9	5		1	0	1	11	11		0.543374	4	4	8	7		0.762554	0	0	11	9		0.543374	0	0	11	8		1	0	1	11	10		0.117972	0	0	6	14
hsa-mir-302d_0		0.762554	1	0	12	11		0.341916	4	6	9	5		1	0	1	11	11		0.543374	4	4	8	7		0.762554	0	0	11	9		0.543374	0	0	11	8		1	0	1	11	10		0.117972	0	0	6	14
hsa-mir-302e_0		1	4	3	7	7		1	9	8	3	2		0.479844	5	3	5	9		0.840143	7	8	3	2		0.175966	5	2	4	10		0.382488	4	2	6	10		0.306197	5	2	5	9		0.494841	3	4	8	5
hsa-mir-302f_0		0.465436	5	4	6	10		0.290686	8	9	5	2		0.790249	3	5	7	7		1	8	8	3	3		0.119096	7	2	7	6		1	5	5	7	7		0.710544	4	3	6	9		0.0812443	1	4	11	5
hsa-mir-30a_0		0.850578	4	3	9	8		0.516248	7	8	4	3		0.769284	4	2	7	7		0.84898	7	6	4	4		0.157938	5	1	7	6		0.37274	2	4	9	5		0.112295	4	1	9	5		0.540496	4	2	8	9
hsa-mir-30b_0		0.290656	17	13	2	1		0.60823	6	8	6	3		0.0503564	18	11	0	3	Ambiguous	0.0424259	6	5	5	4		0.197458	16	14	2	0		0.159723	16	16	3	0		0.13306	18	12	1	2		0.610098	17	16	0	2
hsa-mir-30c-1_0		0.24729	7	2	3	4	Low	0.0416924	8	9	3	2		1	4	4	3	3		0.421252	7	5	3	3		0.0906984	8	2	3	2		0.408699	7	3	3	3		0.058868	8	2	1	5		0.104388	8	2	2	3
hsa-mir-30c-2_0		0.850578	4	3	9	8		0.516248	7	8	4	3		0.769284	4	2	7	7		0.84898	7	6	4	4		0.157938	5	1	7	6		0.37274	2	4	9	5		0.112295	4	1	9	5		0.540496	4	2	8	9
hsa-mir-30d_0		0.290656	17	13	2	1		0.60823	6	8	6	3		0.0503564	18	11	0	3	Ambiguous	0.0424259	6	5	5	4		0.197458	16	14	2	0		0.159723	16	16	3	0		0.13306	18	12	1	2		0.610098	17	16	0	2
hsa-mir-30e_0		0.24729	7	2	3	4	Low	0.0416924	8	9	3	2		1	4	4	3	3		0.421252	7	5	3	3		0.0906984	8	2	3	2		0.408699	7	3	3	3		0.058868	8	2	1	5		0.104388	8	2	2	3
hsa-mir-31_0		0.762554	0	0	11	13		0.863152	4	6	9	5		1	0	0	12	13		1	4	4	8	7		1	0	0	13	14		0.347475	1	0	15	12		1	1	0	11	12		1	0	0	12	13
hsa-mir-32_0		0.442665	4	1	4	6		0.439644	9	7	4	2		0.640054	3	2	3	6	Low	0.0159376	7	8	3	2		0.347848	4	3	8	4		0.232436	6	2	5	4		0.268334	2	6	5	5		0.1311	6	4	6	2
hsa-mir-320a_0		0.803697	1	2	15	13		0.769498	6	7	6	4		1	1	1	15	15		0.114844	6	6	5	5		0.298169	3	0	13	16		0.803697	2	1	14	13		0.141084	4	0	13	14		0.0543078	1	3	9	16
hsa-mir-320b-1_0		0.580717	6	3	4	4		0.0683163	8	9	3	2		0.840143	3	4	7	5		0.275671	8	7	3	3		0.114065	4	4	9	3		0.366934	3	4	6	2		0.239731	5	1	6	7		0.250288	4	2	3	8
hsa-mir-320b-2_0		0.397253	13	9	2	1		1	6	7	7	4		0.812543	8	9	1	2		0.762554	5	5	6	5		1	10	9	1	2		0.762554	11	8	1	1		0.504461	13	9	1	2		1	10	11	1	1
hsa-mir-320c-1_0		0.703122	4	3	5	8		0.737188	7	8	5	2		0.619902	2	4	6	4		0.703122	7	8	4	3		0.691704	4	2	6	5		0.845624	3	4	6	7		0.333661	1	3	5	8		0.0626902	0	3	9	4
hsa-mir-320c-2_0		0.710544	4	3	6	9		0.570161	7	8	5	2		0.763244	2	4	6	6		0.710544	7	8	3	3		0.411791	5	2	6	5		0.845624	3	4	6	7		0.554683	2	3	5	8	Low	0.0166721	0	3	11	4	Low
hsa-mir-320d-1_0		0.872767	1	1	14	12		0.86275	5	6	8	3		0.144856	0	2	17	11		0.433372	4	5	6	5		0.494096	1	2	15	11		1	1	2	13	12		0.631932	1	2	12	14		0.133659	3	0	10	11
hsa-mir-323_0		1	8	8	4	3		0.821458	7	7	3	3		0.393521	6	9	4	1		0.336168	8	7	3	2		1	7	7	2	3		0.920894	9	7	4	4		0.436987	6	9	5	2		0.162158	10	6	3	2
hsa-mir-324_0		0.690288	2	3	12	9		0.300446	7	7	4	2		0.645239	1	2	12	9		0.567462	7	6	4	3		0.174498	3	2	5	11		0.479121	4	1	9	11		0.23711	4	4	5	10		0.267325	2	2	9	5
hsa-mir-326_0		0.681917	6	8	2	3		0.171055	7	8	7	3		0.563166	6	9	2	3		0.501076	6	7	4	3		0.645239	12	9	1	2		1	8	8	3	2		0.568034	10	7	3	2		0.495683	11	8	1	3
hsa-mir-328_0		0.541186	9	6	5	4		0.357016	10	7	3	2		0.606069	9	10	5	2		0.36651	8	9	3	2	High	0.00571488	13	4	3	2		0.793046	8	8	5	3		1	7	7	3	3		0.631401	8	6	4	3
hsa-mir-329-1_0		1	8	8	4	3		0.821458	7	7	3	3		0.393521	6	9	4	1		0.336168	8	7	3	2		1	7	7	2	3		0.920894	9	7	4	4		0.436987	6	9	5	2		0.162158	10	6	3	2
hsa-mir-329-2_0		1	8	8	4	3		0.821458	7	7	3	3		0.393521	6	9	4	1		0.336168	8	7	3	2		1	7	7	2	3		0.920894	9	7	4	4		0.436987	6	9	5	2		0.162158	10	6	3	2
hsa-mir-330_0		0.722122	8	5	4	5	Ambiguous	0.0403796	9	8	3	2		0.410934	9	5	4	4		0.519811	9	9	3	2		0.622449	6	7	6	3		1	7	6	4	4		0.725685	6	5	4	7		0.505643	7	4	4	5
hsa-mir-331_0		0.0786946	10	5	2	0		0.896548	8	7	6	4		1	8	7	1	2		0.228482	4	6	6	3	High	0.008844	10	2	0	2		0.863763	7	5	1	1		0.488037	9	5	2	2		0.126593	9	5	0	3
hsa-mir-335_0		0.130247	9	5	5	2		0.0841969	9	8	3	2		0.677983	7	9	5	3		1	8	7	3	2		0.823831	5	7	3	2		1	9	8	3	4		0.902196	10	8	2	2		0.153324	11	5	3	4
hsa-mir-337_0		1	8	8	4	3		0.821458	7	7	3	3		0.393521	6	9	4	1		0.336168	8	7	3	2		1	7	7	2	3		0.920894	9	7	4	4		0.436987	6	9	5	2		0.162158	10	6	3	2
hsa-mir-338_0		0.167497	13	7	1	1		0.875029	6	7	9	5		1	9	9	1	0		0.763493	5	5	7	6		0.223143	11	7	1	0	High	0.0328649	13	6	1	0		0.275578	11	6	1	1		1	8	8	0	1
hsa-mir-339_0		0.400312	17	13	1	1		1	6	7	7	4		0.869131	13	15	1	1		1	5	5	6	4		0.343749	15	14	2	0		0.487607	17	15	1	0		0.383827	15	11	2	1		0.427935	15	11	1	2
hsa-mir-33a_0		0.685649	3	1	8	9		0.182585	5	6	7	3		0.503918	2	2	11	7		0.812543	4	4	7	5		1	2	1	8	8		0.669641	1	1	12	8		1	1	2	7	7		0.626975	2	1	6	9
hsa-mir-33b_0		0.215965	4	3	12	7		0.075707	10	8	3	3		0.52538	3	4	11	7		0.378048	8	9	4	2		0.308656	5	1	7	9		0.38764	5	3	11	8		0.631975	7	4	5	7		0.0942116	3	4	10	4
hsa-mir-340_0		0.445626	6	9	3	1		0.161876	7	8	6	3		0.073759	8	10	0	4		1	5	6	3	3		1	9	8	2	2		1	8	9	2	2		0.900758	9	7	2	2		0.120672	7	9	4	0
hsa-mir-342_0		1	8	8	4	3		0.655669	7	7	3	3		0.469861	6	8	4	1		0.336168	8	7	3	2		1	7	7	2	3		0.627483	9	6	4	4		0.596246	6	8	5	2		0.162158	10	6	3	2
hsa-mir-345_0		1	8	8	4	3		0.655669	7	7	3	3		0.469861	6	8	4	1		0.336168	8	7	3	2		1	7	7	2	3		0.627483	9	6	4	4		0.596246	6	8	5	2		0.162158	10	6	3	2
hsa-mir-346_0		0.447383	3	3	9	5	High	0.00725777	7	6	3	3		0.654411	2	4	9	7		0.73104	6	7	6	2		0.270388	1	4	10	6		0.460351	1	3	11	8		0.737899	1	3	8	8		0.583146	2	5	7	6
hsa-mir-34a_0		0.329198	4	1	8	7		0.227729	9	8	4	3		0.206116	4	2	8	4		0.790249	7	7	4	4		0.460167	4	1	6	6		0.691704	4	2	6	5		0.183029	5	1	5	9		0.598814	3	3	3	6
hsa-mir-34b_0		1	4	5	5	5	Low	0.0104404	8	9	4	2		0.504769	4	7	5	3		0.19432	9	7	3	3		0.697309	3	6	5	4		0.274677	3	7	3	4		0.906577	3	5	4	4		0.594592	3	6	2	4
hsa-mir-34c_0		1	4	5	5	5	Low	0.0104404	8	9	4	2		0.504769	4	7	5	3		0.19432	9	7	3	3		0.697309	3	6	5	4		0.274677	3	7	3	4		0.906577	3	5	4	4		0.594592	3	6	2	4
hsa-mir-365-1_0	High	0.00798204	10	1	4	6		0.327466	10	9	3	3		0.519811	9	6	4	3		0.436823	8	8	4	3		0.0845481	9	6	1	7		0.0805345	10	3	4	6		0.0815714	6	5	1	7		0.608598	7	7	6	4
hsa-mir-365-2_0		0.166342	7	2	3	3		0.434192	8	8	4	3		0.377362	6	2	3	3		0.132628	7	8	5	3		0.130014	6	1	3	3		0.09842	7	1	3	5		0.577194	7	4	3	3		0.0586115	4	4	0	5
hsa-mir-367_0		0.762554	1	0	12	11		0.341916	4	6	9	5		1	0	1	11	11		0.543374	4	4	8	7		0.762554	0	0	11	9		0.543374	0	0	11	8		1	0	1	11	10		0.117972	0	0	6	14
hsa-mir-369_0		1	8	8	4	3		0.821458	7	7	3	3		0.393521	6	9	4	1		0.336168	8	7	3	2		1	7	7	2	3		0.920894	9	7	4	4		0.436987	6	9	5	2		0.162158	10	6	3	2
hsa-mir-370_0		1	8	8	4	3		0.821458	7	7	3	3		0.393521	6	9	4	1		0.336168	8	7	3	2		1	7	7	2	3		0.920894	9	7	4	4		0.436987	6	9	5	2		0.162158	10	6	3	2
hsa-mir-371_0		0.284161	9	4	3	3		0.198083	9	7	4	2		0.37274	9	5	2	4		1	7	8	3	2		0.830356	6	8	3	2		0.834597	7	8	2	3		0.190061	6	7	2	6		0.716458	7	5	4	5
hsa-mir-372_0		0.284161	9	4	3	3		0.198083	9	7	4	2		0.37274	9	5	2	4		1	7	8	3	2		0.830356	6	8	3	2		0.834597	7	8	2	3		0.190061	6	7	2	6		0.716458	7	5	4	5
hsa-mir-373_0		0.284161	9	4	3	3		0.198083	9	7	4	2		0.37274	9	5	2	4		1	7	8	3	2		0.830356	6	8	3	2		0.834597	7	8	2	3		0.190061	6	7	2	6		0.716458	7	5	4	5
hsa-mir-375_0		0.548774	5	3	1	3		0.207344	6	7	7	4		0.60406	4	6	1	2		0.252141	6	5	6	6		0.720513	6	4	0	1		0.15864	6	5	0	4		0.856022	4	6	1	1		0.636888	5	5	3	1	High
hsa-mir-376a-1_0		1	8	8	4	3		0.821458	7	7	3	3		0.393521	6	9	4	1		0.336168	8	7	3	2		1	7	7	2	3		0.920894	9	7	4	4		0.436987	6	9	5	2		0.162158	10	6	3	2
hsa-mir-376a-2_0		1	8	8	4	3		0.821458	7	7	3	3		0.393521	6	9	4	1		0.336168	8	7	3	2		1	7	7	2	3		0.920894	9	7	4	4		0.436987	6	9	5	2		0.162158	10	6	3	2
hsa-mir-376b_0		1	8	8	4	3		0.821458	7	7	3	3		0.393521	6	9	4	1		0.336168	8	7	3	2		1	7	7	2	3		0.920894	9	7	4	4		0.436987	6	9	5	2		0.162158	10	6	3	2
hsa-mir-376c_0		1	8	8	4	3		0.821458	7	7	3	3		0.393521	6	9	4	1		0.336168	8	7	3	2		1	7	7	2	3		0.920894	9	7	4	4		0.436987	6	9	5	2		0.162158	10	6	3	2
hsa-mir-377_0		1	8	8	4	3		0.821458	7	7	3	3		0.393521	6	9	4	1		0.336168	8	7	3	2		1	7	7	2	3		0.920894	9	7	4	4		0.436987	6	9	5	2		0.162158	10	6	3	2
hsa-mir-378_0		1	5	6	3	2		0.413818	7	7	5	2		0.531357	6	8	2	4		1	6	6	3	2		0.894298	7	5	2	2		1	6	6	2	3		0.54196	7	4	3	2		0.392309	3	7	2	2
hsa-mir-379_0		1	8	8	4	3		0.821458	7	7	3	3		0.393521	6	9	4	1		0.336168	8	7	3	2		1	7	7	2	3		0.920894	9	7	4	4		0.436987	6	9	5	2		0.162158	10	6	3	2
hsa-mir-380_0		1	8	8	4	3		0.821458	7	7	3	3		0.393521	6	9	4	1		0.336168	8	7	3	2		1	7	7	2	3		0.920894	9	7	4	4		0.436987	6	9	5	2		0.162158	10	6	3	2
hsa-mir-381_0		1	8	8	4	3		0.821458	7	7	3	3		0.393521	6	9	4	1		0.336168	8	7	3	2		1	7	7	2	3		0.920894	9	7	4	4		0.436987	6	9	5	2		0.162158	10	6	3	2
hsa-mir-382_0		1	8	8	4	3		0.821458	7	7	3	3		0.393521	6	9	4	1		0.336168	8	7	3	2		1	7	7	2	3		0.920894	9	7	4	4		0.436987	6	9	5	2		0.162158	10	6	3	2
hsa-mir-383_0		0.894298	2	2	15	13		0.448753	6	7	5	3		0.795644	1	2	16	14		0.198703	6	6	5	4		0.180178	3	0	12	17		0.795644	2	1	15	14		0.169439	4	0	12	15		0.288686	2	3	9	15
hsa-mir-409_0		1	8	8	4	3		0.821458	7	7	3	3		0.393521	6	9	4	1		0.336168	8	7	3	2		1	7	7	2	3		0.920894	9	7	4	4		0.436987	6	9	5	2		0.162158	10	6	3	2
hsa-mir-410_0		1	8	8	4	3		0.821458	7	7	3	3		0.393521	6	9	4	1		0.336168	8	7	3	2		1	7	7	2	3		0.920894	9	7	4	4		0.436987	6	9	5	2		0.162158	10	6	3	2
hsa-mir-411_0		1	8	8	4	3		0.821458	7	7	3	3		0.393521	6	9	4	1		0.336168	8	7	3	2		1	7	7	2	3		0.920894	9	7	4	4		0.436987	6	9	5	2		0.162158	10	6	3	2
hsa-mir-412_0		1	8	8	4	3		0.821458	7	7	3	3		0.393521	6	9	4	1		0.336168	8	7	3	2		1	7	7	2	3		0.920894	9	7	4	4		0.436987	6	9	5	2		0.162158	10	6	3	2
hsa-mir-422a_0		0.814222	5	4	3	2		0.768774	6	7	4	3		0.795644	6	5	2	1		0.659406	5	6	3	3		0.0906984	8	2	3	2		0.814222	5	4	3	2		0.80003	2	4	4	3		0.862644	3	3	2	1
hsa-mir-423_0		0.260112	6	2	3	2		0.678857	8	7	4	3		0.132085	7	2	3	2		0.0650709	7	7	5	3		0.333714	5	1	3	3		0.09842	7	1	3	5		0.814222	6	4	2	3		0.0586115	4	4	0	5
hsa-mir-425_0		0.364044	0	1	14	10		0.208805	4	6	7	5		0.75967	1	0	12	14		0.543374	4	4	8	5		0.762554	1	0	12	11	Low	0.0328649	1	0	15	8		0.0914847	1	1	14	7		0.220672	2	0	10	12
hsa-mir-429_0		0.687572	3	2	9	7		0.434286	8	8	5	2		0.447383	3	3	9	5		0.790249	6	7	3	4		0.898213	2	2	6	8		0.830356	2	3	6	7		0.292936	3	3	5	10		0.22712	1	4	4	7
hsa-mir-431_0		1	8	8	4	3		0.821458	7	7	3	3		0.393521	6	9	4	1		0.336168	8	7	3	2		1	7	7	2	3		0.920894	9	7	4	4		0.436987	6	9	5	2		0.162158	10	6	3	2
hsa-mir-432_0		1	8	8	4	3		0.821458	7	7	3	3		0.393521	6	9	4	1		0.336168	8	7	3	2		1	7	7	2	3		0.920894	9	7	4	4		0.436987	6	9	5	2		0.162158	10	6	3	2
hsa-mir-433_0		1	8	8	4	3		0.821458	7	7	3	3		0.393521	6	9	4	1		0.336168	8	7	3	2		1	7	7	2	3		0.920894	9	7	4	4		0.436987	6	9	5	2		0.162158	10	6	3	2
hsa-mir-449a_0		0.528101	6	6	6	3		0.544718	9	8	3	2		0.712257	4	5	7	4	Ambiguous	0.0323963	9	8	3	2		0.532054	6	4	5	3		0.359207	6	4	6	3		0.117458	7	4	6	2		0.916079	4	5	4	6
hsa-mir-449b_0		0.528101	6	6	6	3		0.544718	9	8	3	2		0.712257	4	5	7	4	Ambiguous	0.0323963	9	8	3	2		0.532054	6	4	5	3		0.359207	6	4	6	3		0.117458	7	4	6	2		0.916079	4	5	4	6
hsa-mir-451_0		0.166342	7	2	3	3		0.732187	8	7	4	3		0.132628	8	2	2	3		0.0581161	6	7	4	4		0.0591988	6	1	4	2		0.188714	7	2	3	5		0.412476	7	4	1	3		0.421445	5	4	1	4
hsa-mir-453_0		1	8	8	4	3		0.821458	7	7	3	3		0.393521	6	9	4	1		0.336168	8	7	3	2		1	7	7	2	3		0.920894	9	7	4	4		0.436987	6	9	5	2		0.162158	10	6	3	2
hsa-mir-454_0		0.875029	10	8	1	1		0.764539	6	7	8	3		0.302943	8	6	2	0		1	5	5	6	6		0.313869	9	7	2	0		0.223143	11	7	1	0		1	9	8	1	1		0.619265	5	7	0	1
hsa-mir-455_0		0.906577	5	3	4	4		0.269871	10	8	4	2		0.906577	4	4	3	5		0.139718	9	9	3	2		0.380393	6	4	7	4		0.44569	7	3	4	4		0.254573	3	7	4	5		0.152951	8	5	6	3
hsa-mir-483_0		0.672829	2	3	5	7		1	7	8	5	2		0.206116	2	4	4	8		1	7	6	4	3		0.242342	5	2	4	8		0.311607	3	1	5	9		0.63601	4	2	5	7		0.150116	1	6	8	5
hsa-mir-484_0	High	0.0221879	9	1	4	6		0.762281	10	8	3	3		0.710544	8	6	4	3		0.617622	8	8	4	2		0.0853069	8	6	1	7		0.155805	9	3	4	6		0.175564	5	5	2	7		0.777944	7	6	6	5
hsa-mir-485_0		1	8	8	4	3		0.821458	7	7	3	3		0.393521	6	9	4	1		0.336168	8	7	3	2		1	7	7	2	3		0.920894	9	7	4	4		0.436987	6	9	5	2		0.162158	10	6	3	2
hsa-mir-486_0		0.50192	6	4	11	9		0.684631	10	8	3	2		0.627483	3	6	10	9		0.714739	9	9	3	2		0.627483	6	3	9	11		0.33388	4	5	12	7		0.139215	6	5	12	7		0.732329	5	5	7	11
hsa-mir-487a_0		1	8	8	4	3		0.821458	7	7	3	3		0.393521	6	9	4	1		0.336168	8	7	3	2		1	7	7	2	3		0.920894	9	7	4	4		0.436987	6	9	5	2		0.162158	10	6	3	2
hsa-mir-487b_0		1	8	8	4	3		0.821458	7	7	3	3		0.393521	6	9	4	1		0.336168	8	7	3	2		1	7	7	2	3		0.920894	9	7	4	4		0.436987	6	9	5	2		0.162158	10	6	3	2
hsa-mir-488_0		0.217852	13	8	2	1		0.177881	6	7	6	4		1	11	11	1	1		0.242037	5	5	4	4		1	9	9	2	1		1	10	9	2	2		0.814173	12	10	1	2		0.567811	8	11	2	1
hsa-mir-489_0		0.415302	11	9	3	1		0.147031	8	8	4	3		0.223375	7	12	4	1		0.690288	8	6	4	3		0.213946	6	12	3	1		0.52538	7	11	4	3		0.550521	10	12	2	0		0.220199	13	7	2	3
hsa-mir-490_0		0.0839152	8	5	5	1		0.248015	8	8	4	2		0.64714	6	8	4	2		1	7	7	4	3		0.803697	6	7	3	1		0.606069	9	8	4	2		0.354955	10	7	3	1	High	0.0279573	11	3	2	5
hsa-mir-491_0		0.762554	0	0	11	13		0.451419	4	6	8	5		1	1	0	12	13		0.37171	4	4	8	7		1	1	0	13	14		0.215152	1	0	15	11		1	1	1	11	12		1	0	1	12	12
hsa-mir-492_0		0.112235	10	6	2	0		0.709041	8	7	6	4		0.80915	9	7	1	2		0.236851	5	6	6	3	High	0.0126144	11	3	0	2		0.746988	8	5	1	1		0.80915	9	6	2	2	High	0.0418147	11	5	0	3
hsa-mir-493_0		1	8	8	4	3		0.821458	7	7	3	3		0.393521	6	9	4	1		0.336168	8	7	3	2		1	7	7	2	3		0.920894	9	7	4	4		0.436987	6	9	5	2		0.162158	10	6	3	2
hsa-mir-494_0		1	8	8	4	3		0.821458	7	7	3	3		0.393521	6	9	4	1		0.336168	8	7	3	2		1	7	7	2	3		0.920894	9	7	4	4		0.436987	6	9	5	2		0.162158	10	6	3	2
hsa-mir-495_0		1	8	8	4	3		0.821458	7	7	3	3		0.393521	6	9	4	1		0.336168	8	7	3	2		1	7	7	2	3		0.920894	9	7	4	4		0.436987	6	9	5	2		0.162158	10	6	3	2
hsa-mir-496_0		1	8	8	4	3		0.821458	7	7	3	3		0.393521	6	9	4	1		0.336168	8	7	3	2		1	7	7	2	3		0.920894	9	7	4	4		0.436987	6	9	5	2		0.162158	10	6	3	2
hsa-mir-497_0		0.690288	2	3	12	9		0.300446	7	7	4	2		0.645239	1	2	12	9		0.567462	7	6	4	3		0.174498	3	2	5	11		0.479121	4	1	9	11		0.23711	4	4	5	10		0.267325	2	2	9	5
hsa-mir-498_0		0.284161	9	4	3	3		0.198083	9	7	4	2		0.37274	9	5	2	4		1	7	8	3	2		0.830356	6	8	3	2		0.834597	7	8	2	3		0.190061	6	7	2	6		0.716458	7	5	4	5
hsa-mir-499_0		0.544586	15	11	1	1		0.898213	6	7	6	5		0.746988	14	16	1	0		1	5	5	6	4		0.185383	13	18	1	0		0.371422	16	12	2	1		0.197458	14	16	0	2		0.891782	15	12	1	2
hsa-mir-511-1_0		0.465436	5	4	11	8		0.518554	10	9	3	2		0.728163	5	4	11	9		0.858442	9	8	3	3		0.274232	7	3	9	9		0.392946	6	3	10	9		0.134833	6	1	9	10		0.782944	6	5	5	7
hsa-mir-511-2_0		0.465436	5	4	11	8		0.518554	10	9	3	2		0.728163	5	4	11	9		0.858442	9	8	3	3		0.274232	7	3	9	9		0.392946	6	3	10	9		0.134833	6	1	9	10		0.782944	6	5	5	7
hsa-mir-512-1_0		0.284161	9	4	3	3		0.198083	9	7	4	2		0.37274	9	5	2	4		1	7	8	3	2		0.830356	6	8	3	2		0.834597	7	8	2	3		0.190061	6	7	2	6		0.716458	7	5	4	5
hsa-mir-512-2_0		0.284161	9	4	3	3		0.198083	9	7	4	2		0.37274	9	5	2	4		1	7	8	3	2		0.830356	6	8	3	2		0.834597	7	8	2	3		0.190061	6	7	2	6		0.716458	7	5	4	5
hsa-mir-515-1_0		0.284161	9	4	3	3		0.198083	9	7	4	2		0.37274	9	5	2	4		1	7	8	3	2		0.830356	6	8	3	2		0.834597	7	8	2	3		0.190061	6	7	2	6		0.716458	7	5	4	5
hsa-mir-515-2_0		0.284161	9	4	3	3		0.198083	9	7	4	2		0.37274	9	5	2	4		1	7	8	3	2		0.830356	6	8	3	2		0.834597	7	8	2	3		0.190061	6	7	2	6		0.716458	7	5	4	5
hsa-mir-516a-1_0		0.284161	9	4	3	3		0.198083	9	7	4	2		0.37274	9	5	2	4		1	7	8	3	2		0.830356	6	8	3	2		0.834597	7	8	2	3		0.190061	6	7	2	6		0.716458	7	5	4	5
hsa-mir-516a-2_0		0.284161	9	4	3	3		0.198083	9	7	4	2		0.37274	9	5	2	4		1	7	8	3	2		0.830356	6	8	3	2		0.834597	7	8	2	3		0.190061	6	7	2	6		0.716458	7	5	4	5
hsa-mir-516b-1_0		0.284161	9	4	3	3		0.198083	9	7	4	2		0.37274	9	5	2	4		1	7	8	3	2		0.830356	6	8	3	2		0.834597	7	8	2	3		0.190061	6	7	2	6		0.716458	7	5	4	5
hsa-mir-516b-2_0		0.284161	9	4	3	3		0.198083	9	7	4	2		0.37274	9	5	2	4		1	7	8	3	2		0.830356	6	8	3	2		0.834597	7	8	2	3		0.190061	6	7	2	6		0.716458	7	5	4	5
hsa-mir-517a_0		0.284161	9	4	3	3		0.198083	9	7	4	2		0.37274	9	5	2	4		1	7	8	3	2		0.830356	6	8	3	2		0.834597	7	8	2	3		0.190061	6	7	2	6		0.716458	7	5	4	5
hsa-mir-517b_0		0.284161	9	4	3	3		0.198083	9	7	4	2		0.37274	9	5	2	4		1	7	8	3	2		0.830356	6	8	3	2		0.834597	7	8	2	3		0.190061	6	7	2	6		0.716458	7	5	4	5
hsa-mir-517c_0		0.284161	9	4	3	3		0.198083	9	7	4	2		0.37274	9	5	2	4		1	7	8	3	2		0.830356	6	8	3	2		0.834597	7	8	2	3		0.190061	6	7	2	6		0.716458	7	5	4	5
hsa-mir-518a-1_0		0.284161	9	4	3	3		0.198083	9	7	4	2		0.37274	9	5	2	4		1	7	8	3	2		0.830356	6	8	3	2		0.834597	7	8	2	3		0.190061	6	7	2	6		0.716458	7	5	4	5
hsa-mir-518a-2_0		0.284161	9	4	3	3		0.198083	9	7	4	2		0.37274	9	5	2	4		1	7	8	3	2		0.830356	6	8	3	2		0.834597	7	8	2	3		0.190061	6	7	2	6		0.716458	7	5	4	5
hsa-mir-518b_0		0.284161	9	4	3	3		0.198083	9	7	4	2		0.37274	9	5	2	4		1	7	8	3	2		0.830356	6	8	3	2		0.834597	7	8	2	3		0.190061	6	7	2	6		0.716458	7	5	4	5
hsa-mir-518c_0		0.284161	9	4	3	3		0.198083	9	7	4	2		0.37274	9	5	2	4		1	7	8	3	2		0.830356	6	8	3	2		0.834597	7	8	2	3		0.190061	6	7	2	6		0.716458	7	5	4	5
hsa-mir-518d_0		0.284161	9	4	3	3		0.198083	9	7	4	2		0.37274	9	5	2	4		1	7	8	3	2		0.830356	6	8	3	2		0.834597	7	8	2	3		0.190061	6	7	2	6		0.716458	7	5	4	5
hsa-mir-518e_0		0.284161	9	4	3	3		0.198083	9	7	4	2		0.37274	9	5	2	4		1	7	8	3	2		0.830356	6	8	3	2		0.834597	7	8	2	3		0.190061	6	7	2	6		0.716458	7	5	4	5
hsa-mir-518f_0		0.284161	9	4	3	3		0.198083	9	7	4	2		0.37274	9	5	2	4		1	7	8	3	2		0.830356	6	8	3	2		0.834597	7	8	2	3		0.190061	6	7	2	6		0.716458	7	5	4	5
hsa-mir-519a-1_0		0.284161	9	4	3	3		0.198083	9	7	4	2		0.37274	9	5	2	4		1	7	8	3	2		0.830356	6	8	3	2		0.834597	7	8	2	3		0.190061	6	7	2	6		0.716458	7	5	4	5
hsa-mir-519a-2_0		0.284161	9	4	3	3		0.198083	9	7	4	2		0.37274	9	5	2	4		1	7	8	3	2		0.830356	6	8	3	2		0.834597	7	8	2	3		0.190061	6	7	2	6		0.716458	7	5	4	5
hsa-mir-519b_0		0.284161	9	4	3	3		0.198083	9	7	4	2		0.37274	9	5	2	4		1	7	8	3	2		0.830356	6	8	3	2		0.834597	7	8	2	3		0.190061	6	7	2	6		0.716458	7	5	4	5
hsa-mir-519c_0		0.284161	9	4	3	3		0.198083	9	7	4	2		0.37274	9	5	2	4		1	7	8	3	2		0.830356	6	8	3	2		0.834597	7	8	2	3		0.190061	6	7	2	6		0.716458	7	5	4	5
hsa-mir-519d_0		0.284161	9	4	3	3		0.198083	9	7	4	2		0.37274	9	5	2	4		1	7	8	3	2		0.830356	6	8	3	2		0.834597	7	8	2	3		0.190061	6	7	2	6		0.716458	7	5	4	5
hsa-mir-519e_0		0.284161	9	4	3	3		0.198083	9	7	4	2		0.37274	9	5	2	4		1	7	8	3	2		0.830356	6	8	3	2		0.834597	7	8	2	3		0.190061	6	7	2	6		0.716458	7	5	4	5
hsa-mir-520a_0		0.284161	9	4	3	3		0.198083	9	7	4	2		0.37274	9	5	2	4		1	7	8	3	2		0.830356	6	8	3	2		0.834597	7	8	2	3		0.190061	6	7	2	6		0.716458	7	5	4	5
hsa-mir-520b_0		0.284161	9	4	3	3		0.198083	9	7	4	2		0.37274	9	5	2	4		1	7	8	3	2		0.830356	6	8	3	2		0.834597	7	8	2	3		0.190061	6	7	2	6		0.716458	7	5	4	5
hsa-mir-520c_0		0.284161	9	4	3	3		0.198083	9	7	4	2		0.37274	9	5	2	4		1	7	8	3	2		0.830356	6	8	3	2		0.834597	7	8	2	3		0.190061	6	7	2	6		0.716458	7	5	4	5
hsa-mir-520d_0		0.284161	9	4	3	3		0.198083	9	7	4	2		0.37274	9	5	2	4		1	7	8	3	2		0.830356	6	8	3	2		0.834597	7	8	2	3		0.190061	6	7	2	6		0.716458	7	5	4	5
hsa-mir-520e_0		0.284161	9	4	3	3		0.198083	9	7	4	2		0.37274	9	5	2	4		1	7	8	3	2		0.830356	6	8	3	2		0.834597	7	8	2	3		0.190061	6	7	2	6		0.716458	7	5	4	5
hsa-mir-520f_0		0.284161	9	4	3	3		0.198083	9	7	4	2		0.37274	9	5	2	4		1	7	8	3	2		0.830356	6	8	3	2		0.834597	7	8	2	3		0.190061	6	7	2	6		0.716458	7	5	4	5
hsa-mir-520g_0		0.284161	9	4	3	3		0.198083	9	7	4	2		0.37274	9	5	2	4		1	7	8	3	2		0.830356	6	8	3	2		0.834597	7	8	2	3		0.190061	6	7	2	6		0.716458	7	5	4	5
hsa-mir-520h_0		0.284161	9	4	3	3		0.198083	9	7	4	2		0.37274	9	5	2	4		1	7	8	3	2		0.830356	6	8	3	2		0.834597	7	8	2	3		0.190061	6	7	2	6		0.716458	7	5	4	5
hsa-mir-521-1_0		0.284161	9	4	3	3		0.198083	9	7	4	2		0.37274	9	5	2	4		1	7	8	3	2		0.830356	6	8	3	2		0.834597	7	8	2	3		0.190061	6	7	2	6		0.716458	7	5	4	5
hsa-mir-521-2_0		0.284161	9	4	3	3		0.198083	9	7	4	2		0.37274	9	5	2	4		1	7	8	3	2		0.830356	6	8	3	2		0.834597	7	8	2	3		0.190061	6	7	2	6		0.716458	7	5	4	5
hsa-mir-522_0		0.284161	9	4	3	3		0.198083	9	7	4	2		0.37274	9	5	2	4		1	7	8	3	2		0.830356	6	8	3	2		0.834597	7	8	2	3		0.190061	6	7	2	6		0.716458	7	5	4	5
hsa-mir-523_0		0.284161	9	4	3	3		0.198083	9	7	4	2		0.37274	9	5	2	4		1	7	8	3	2		0.830356	6	8	3	2		0.834597	7	8	2	3		0.190061	6	7	2	6		0.716458	7	5	4	5
hsa-mir-524_0		0.284161	9	4	3	3		0.198083	9	7	4	2		0.37274	9	5	2	4		1	7	8	3	2		0.830356	6	8	3	2		0.834597	7	8	2	3		0.190061	6	7	2	6		0.716458	7	5	4	5
hsa-mir-525_0		0.284161	9	4	3	3		0.198083	9	7	4	2		0.37274	9	5	2	4		1	7	8	3	2		0.830356	6	8	3	2		0.834597	7	8	2	3		0.190061	6	7	2	6		0.716458	7	5	4	5
hsa-mir-526a-1_0		0.284161	9	4	3	3		0.198083	9	7	4	2		0.37274	9	5	2	4		1	7	8	3	2		0.830356	6	8	3	2		0.834597	7	8	2	3		0.190061	6	7	2	6		0.716458	7	5	4	5
hsa-mir-526a-2_0		0.284161	9	4	3	3		0.198083	9	7	4	2		0.37274	9	5	2	4		1	7	8	3	2		0.830356	6	8	3	2		0.834597	7	8	2	3		0.190061	6	7	2	6		0.716458	7	5	4	5
hsa-mir-526b_0		0.284161	9	4	3	3		0.198083	9	7	4	2		0.37274	9	5	2	4		1	7	8	3	2		0.830356	6	8	3	2		0.834597	7	8	2	3		0.190061	6	7	2	6		0.716458	7	5	4	5
hsa-mir-527_0		0.284161	9	4	3	3		0.198083	9	7	4	2		0.37274	9	5	2	4		1	7	8	3	2		0.830356	6	8	3	2		0.834597	7	8	2	3		0.190061	6	7	2	6		0.716458	7	5	4	5
hsa-mir-539_0		1	8	8	4	3		0.821458	7	7	3	3		0.393521	6	9	4	1		0.336168	8	7	3	2		1	7	7	2	3		0.920894	9	7	4	4		0.436987	6	9	5	2		0.162158	10	6	3	2
hsa-mir-541_0		1	8	8	4	3		0.821458	7	7	3	3		0.393521	6	9	4	1		0.336168	8	7	3	2		1	7	7	2	3		0.920894	9	7	4	4		0.436987	6	9	5	2		0.162158	10	6	3	2
hsa-mir-543_0		1	8	8	4	3		0.821458	7	7	3	3		0.393521	6	9	4	1		0.336168	8	7	3	2		1	7	7	2	3		0.920894	9	7	4	4		0.436987	6	9	5	2		0.162158	10	6	3	2
hsa-mir-544_0		1	8	8	4	3		0.821458	7	7	3	3		0.393521	6	9	4	1		0.336168	8	7	3	2		1	7	7	2	3		0.920894	9	7	4	4		0.436987	6	9	5	2		0.162158	10	6	3	2
hsa-mir-548a-1_0		1	4	4	7	8		0.222427	9	8	3	2		0.850374	6	4	5	6		0.568469	9	8	3	2		0.850374	6	4	5	6		0.712257	6	4	5	4		1	5	4	5	6		0.802596	7	6	5	6
hsa-mir-548a-2_0		1	2	2	12	11		0.874379	4	6	5	3		0.814173	1	2	11	9		0.460351	4	4	5	4		0.643832	1	2	11	8		0.812543	1	2	10	8		0.645239	2	1	11	9		0.709384	1	2	12	11
hsa-mir-548a-3_0		0.383827	13	14	4	1		0.488536	8	8	4	3		0.0739935	17	10	1	5		0.0616625	7	7	5	3		0.150324	12	13	4	0		0.311607	14	12	3	1	High	0.0143248	18	9	2	4		0.723406	15	14	1	3
hsa-mir-548b_0		0.606069	4	2	9	12		0.630907	7	7	4	2		1	2	2	10	9		0.464602	7	6	3	3		0.836994	3	2	8	10		0.834597	2	3	9	7		0.413638	3	1	10	8		0.535233	2	2	12	11
hsa-mir-548c_0		0.0888026	9	6	3	0		0.102945	7	7	4	2		1	6	6	2	2		0.834597	7	6	3	3	High	0.0322194	10	3	3	2		1	5	5	3	2		0.488037	9	5	2	2		0.252821	8	4	1	3
hsa-mir-548d-1_0		0.60406	16	14	2	1		0.380552	6	8	6	3	High	0.0288606	19	11	0	3		0.104618	7	5	5	3		0.0652336	16	14	3	0	Ambiguous	0.0483347	17	15	3	0	High	0.00326886	20	12	2	2		0.613544	17	17	0	2
hsa-mir-548d-2_0		0.066585	13	6	0	1		0.368733	6	7	9	3		0.313869	9	7	2	0		0.117672	5	5	5	5		0.112235	10	6	2	0	High	0.00675206	12	4	2	0		0.198673	10	7	2	0		1	6	7	1	1
hsa-mir-548e_0		0.216697	1	3	9	4	Ambiguous	0.00252284	8	7	4	2		0.834597	2	4	8	7		0.710544	5	6	4	3		1	2	2	7	6		1	2	1	8	8		0.681917	3	2	6	9		0.689368	2	4	7	5
hsa-mir-548f-1_0		0.137032	3	5	9	3	Ambiguous	0.0187781	9	6	3	2		0.110653	1	6	7	7		1	8	9	3	2		0.344675	2	6	8	6		1	3	3	9	8		1	4	4	7	6		0.918363	5	4	6	7
hsa-mir-548f-2_0		0.385975	6	3	1	3		0.0871604	6	8	6	4		0.640054	4	5	1	3		0.110367	6	6	5	5		0.321245	7	4	0	2	High	0.0333457	7	4	0	6		0.714366	5	5	1	3		0.257594	6	5	4	1	High
hsa-mir-548f-3_0		0.521525	5	4	7	4		0.0713466	10	8	3	2		0.725685	6	5	4	7		0.600149	8	9	3	2		0.120008	7	2	5	4		1	6	5	6	6		0.620179	5	5	7	4		0.771432	3	5	5	7
hsa-mir-548f-4_0		0.114975	12	5	2	3		0.183849	7	7	3	2		0.654411	7	9	4	2		0.83777	7	6	3	2		1	9	8	2	3		0.836994	11	10	3	2		0.505802	12	8	2	2		0.326382	11	6	2	3
hsa-mir-548g_0		0.0724446	3	0	12	9		0.719629	4	6	8	4		1	2	2	10	9		0.645239	5	4	7	5		0.536507	0	0	10	7		0.142302	0	4	9	7		0.598169	0	2	10	9		0.353692	1	1	5	11
hsa-mir-548h-1_0		1	8	8	2	1		0.526791	7	7	7	5		1	6	7	1	1		0.544586	5	6	6	4		1	7	8	1	0		0.494096	9	6	2	1		1	7	8	2	1	High	0.017291	12	4	1	3
hsa-mir-548h-2_0		0.175528	7	2	3	6		0.571435	10	9	4	3		1	6	6	3	3		0.830356	7	8	4	3	High	0.0130725	8	6	0	7		0.0589024	9	2	3	5	High	0.0463312	4	5	1	7		0.503161	5	6	6	3
hsa-mir-548h-3_0		0.52538	4	3	11	8		0.265699	8	7	3	3		0.658463	2	4	10	8		0.394561	8	7	4	2		0.476082	4	1	7	9		0.52538	4	3	11	8		0.799259	6	4	6	6		0.0949583	2	4	10	4
hsa-mir-548h-4_0		0.631932	1	2	15	12		0.609243	6	7	6	4		0.869131	1	1	13	15		0.128316	6	6	5	5		0.298169	3	0	13	16		0.631932	2	1	14	12		0.141084	4	0	13	14		0.282513	1	3	10	15
hsa-mir-548i-1_0		0.0631273	10	4	0	2		0.192144	7	8	5	2		1	8	8	3	2		1	7	6	3	4		0.681917	8	6	3	2		0.823831	5	7	3	2		0.639506	7	9	1	2		0.0926905	10	4	1	4
hsa-mir-548i-2_0		0.906577	4	4	3	5		0.340496	6	7	3	2		1	2	3	5	4		0.133664	7	6	3	2		0.552971	3	3	6	3		0.650053	3	4	5	2		0.885732	2	4	3	3		1	2	2	3	4
hsa-mir-548i-3_0		0.667384	1	1	14	10		0.761651	5	7	6	4		0.762554	1	0	11	13		0.20519	6	5	5	5		0.323095	3	0	11	13	Low	0.0159411	2	0	16	10		0.265416	3	0	12	12		0.437225	1	2	8	13
hsa-mir-548j_0		0.368511	5	2	6	10		0.653967	9	7	3	2		0.38764	3	5	11	6		0.0588142	8	8	3	2		0.836994	2	3	10	8		0.310212	3	4	11	6		0.529599	3	5	9	6		0.767236	3	3	7	10
hsa-mir-548k_0		0.900758	7	9	2	2		0.324049	7	8	7	3		0.563166	6	9	2	3		0.397253	5	6	5	3		0.876115	12	10	1	1		1	9	8	2	2		0.814173	11	8	2	2		0.141018	12	8	0	3
hsa-mir-548l_0		0.504769	4	7	5	3		0.0804353	7	7	5	2		0.140294	3	8	6	2	Ambiguous	0.0163635	9	7	3	2		0.510746	5	8	3	4		0.577194	4	7	3	3		1	5	6	3	3		0.894405	5	5	2	2
hsa-mir-548n_0		0.11591	16	11	1	0		0.117502	6	7	8	5		0.536507	12	14	0	1		0.525602	5	5	7	6		0.202747	16	12	1	0		0.103992	18	12	0	0		0.156342	16	10	1	1		0.754622	14	12	1	1
hsa-mir-548o_0		0.0812799	9	9	6	1		0.356547	8	8	5	3	Low	0.0449512	6	13	6	1		1	8	7	4	4		0.144721	6	12	4	1		0.921357	8	10	4	4		0.74082	10	12	3	1		0.219755	13	8	1	4
hsa-mir-548p_0		0.912805	4	4	6	4		0.13877	9	8	3	2		0.712257	5	4	4	7		0.580717	7	9	3	2		0.417289	6	2	4	4		0.585676	5	2	5	6		0.912805	4	4	6	4		0.635265	3	4	4	7
hsa-mir-549_0		0.712257	5	4	6	4		0.904353	7	8	3	2		0.648314	6	4	3	5		0.502989	8	7	3	2		0.188714	7	2	3	5		0.777861	5	5	3	5		1	3	3	6	5		0.881844	3	3	3	2
hsa-mir-550-1_0		0.533236	16	12	1	1		0.750363	6	7	7	4		0.872767	12	14	1	1		1	5	5	6	4		0.216107	15	13	2	0		0.185383	17	13	1	0		0.206589	15	10	2	1		0.427935	15	11	1	2
hsa-mir-550-2_0		0.156342	16	10	1	1		0.267192	6	7	7	4		0.75967	11	14	1	1		0.869131	5	5	6	4		0.128316	15	12	2	0		0.103992	17	12	1	0		0.206589	15	10	2	1		0.557713	14	11	1	2
hsa-mir-551a_0		0.218929	4	1	9	7		0.565679	9	9	4	3		0.360624	4	3	9	5		0.728163	8	7	4	3		0.395642	4	1	7	7		0.845624	4	3	7	6		0.368511	5	2	6	10		0.617773	3	3	4	7
hsa-mir-551b_0	High	0.0305355	13	5	0	1		0.873166	6	7	7	4		1	9	9	2	1		1	5	5	5	6		0.378988	11	8	0	2		0.433372	10	8	0	2		0.763493	10	11	0	1		0.36216	12	8	1	1
hsa-mir-552_0		0.207748	5	1	3	5		0.126918	7	7	6	3		0.767094	1	2	5	3		0.831839	6	5	5	5		0.172282	4	1	5	2		0.260112	4	1	5	3		0.0690115	4	0	2	5		0.527525	3	1	3	4
hsa-mir-553_0		0.519811	9	6	4	3		0.67771	10	8	3	2		0.722122	7	5	5	4		0.559356	7	8	3	2		0.164593	7	5	6	2		0.294018	7	5	5	2	High	0.0239559	10	2	3	7		0.449222	7	4	4	4
hsa-mir-554_0		0.0546139	18	11	0	0		0.215152	6	7	9	5		0.525602	16	13	0	0		0.0617784	5	5	7	6		0.215152	16	11	0	0		0.331889	17	13	0	1		0.525602	16	13	0	0		0.632478	15	13	1	0
hsa-mir-555_0	High	0.0305355	17	9	0	0		0.449709	6	7	9	5		0.762554	13	11	0	0		0.130844	5	5	7	6		0.227056	13	9	1	0		0.163815	15	9	1	1		0.202747	17	12	0	0		0.533486	13	10	1	0
hsa-mir-556_0	High	0.0148006	15	6	0	0		0.293475	6	7	9	5		1	11	10	0	0		0.223143	5	5	7	6		0.215152	10	6	1	0		0.875029	10	8	1	1		0.364044	14	10	0	0		1	8	9	1	0
hsa-mir-557_0		0.0657805	13	8	2	0		0.452256	6	7	7	4		1	10	11	1	0		0.213985	5	5	5	5		0.474708	9	8	2	0		0.814173	10	9	2	1		0.281852	14	9	1	1		0.427822	8	10	2	0
hsa-mir-558_0		1	7	8	1	1		0.867743	5	7	9	5		0.525602	9	6	0	0		0.75967	5	4	7	6		1	7	7	1	0		0.746988	6	7	0	1		0.746988	6	7	0	1		1	6	7	1	0	High
hsa-mir-559_0		1	8	7	0	1		0.320981	5	7	9	5		0.746988	8	6	0	0		1	5	4	7	6		1	8	7	0	0		0.746988	6	8	0	0		0.746988	6	7	0	1		0.412634	8	6	1	0	High
hsa-mir-561_0		0.25005	8	3	2	2		0.134844	7	7	6	4		0.803697	8	6	1	2		0.276295	6	6	5	4		0.138247	11	6	0	2		0.0531015	11	6	0	4		0.426965	9	7	0	2	Low	0.025796	8	7	5	0
hsa-mir-562_0		0.159723	6	3	0	3		0.229537	6	7	6	4		0.569678	5	6	2	0		0.589218	5	5	4	5		0.321245	7	4	0	2		0.894298	7	5	2	2		1	5	6	2	1		0.650933	5	6	3	1	High
hsa-mir-563_0		0.115085	5	2	10	6		0.747825	8	8	5	3		0.658463	4	2	10	10		0.134576	7	7	4	4	High	0.0239073	5	0	9	7		0.184937	5	2	10	7	Low	0.00790919	4	1	12	5		0.22643	4	1	9	12
hsa-mir-564_0		0.501076	2	1	13	10		0.218133	7	7	6	4		0.80915	2	1	12	14		0.239323	7	6	5	5		0.269001	3	0	11	11	Ambiguous	0.022882	3	0	14	9		0.112299	3	1	13	8	High	0.0416205	4	0	9	12
hsa-mir-566_0		0.223143	0	1	15	10		0.530829	4	6	9	5		0.754622	0	0	13	15		0.543374	4	4	8	7		0.762554	0	0	13	11		0.066585	0	0	16	9		0.0689935	0	1	15	8		0.420437	1	0	11	12
hsa-mir-567_0		0.234608	8	3	2	3		0.429724	8	8	4	2		0.830356	7	6	3	2		1	9	7	3	3		0.691704	6	4	4	3		1	4	5	3	3		0.80915	7	8	3	1		0.349975	8	4	2	4
hsa-mir-568_0		0.201215	8	3	1	3		0.586725	8	8	6	3		0.803697	6	7	3	1		1	6	6	3	4		0.823831	6	5	3	2		0.888533	4	6	2	2		0.589218	7	8	2	0		0.100679	9	3	1	4
hsa-mir-569_0		0.129208	13	7	0	1		1	6	7	7	4		1	10	10	2	1		1	5	5	5	6		0.480998	12	9	0	2		0.244924	12	8	0	2		1	11	11	0	1		0.662281	12	9	1	1
hsa-mir-570_0		0.229855	10	6	0	2		0.0685371	7	8	4	2		0.563166	6	9	2	3		0.601689	8	7	3	3		0.834597	8	7	3	2		0.292936	10	5	3	3		0.568034	7	10	2	3		0.148944	11	6	1	4
hsa-mir-571_0		0.393871	6	2	4	5		0.671321	9	7	3	2		0.417289	6	2	4	4		0.521525	8	8	4	2		1	4	4	4	4		1	5	5	3	3		0.333714	1	5	3	3		0.810527	4	4	2	4
hsa-mir-572_0		0.918386	6	4	5	5		0.39983	9	7	3	2		0.322312	6	2	4	6		1	9	9	3	2		0.912805	4	4	6	4		0.502989	5	4	6	3		0.819382	3	4	3	4		0.757778	4	3	6	5
hsa-mir-573_0		0.289947	6	5	8	4	Ambiguous	0.0470787	9	8	3	2		0.722122	5	4	5	8		0.803242	9	8	3	2		1	4	5	6	5		1	4	4	7	6		0.697309	5	4	3	6		0.448581	5	2	5	7
hsa-mir-574_0		0.290123	3	4	9	4		0.316387	7	8	4	3		0.447383	3	3	5	9		0.150267	6	7	6	3		0.168627	1	5	8	4		0.270388	1	4	10	6		0.446535	1	4	6	5		0.27673	3	1	5	10
hsa-mir-575_0		1	2	1	11	11		0.203205	4	6	9	5		1	1	1	10	10		0.156581	5	4	7	6		0.762554	1	1	11	8		0.323095	0	3	10	8		0.320897	0	2	8	10		0.422752	1	0	7	12
hsa-mir-576_0		0.762554	1	0	12	11		0.751808	4	6	9	5		1	0	1	11	10		0.543374	4	4	8	7		0.762554	0	0	11	9		0.762554	0	0	11	9		1	0	1	11	10		0.349887	0	0	7	13
hsa-mir-577_0		0.763493	1	0	11	10		0.629677	4	6	9	5		1	0	1	10	10		0.54873	4	4	8	7		1	0	0	10	10		0.75967	0	1	10	8		1	0	1	11	11		0.208805	1	0	6	13
hsa-mir-578_0		0.413638	3	1	10	8		0.610964	4	7	6	4		0.408563	3	1	9	7		1	5	4	5	5		0.206589	1	2	11	5		0.150324	0	4	9	6		0.902196	2	2	10	8		0.0645938	2	1	3	11
hsa-mir-579_0		0.0687218	18	11	0	2	Low	0.00681405	7	7	8	5		0.856022	17	15	1	1		0.620481	5	6	6	4		1	16	16	1	0		0.784033	17	15	1	2		0.494665	16	16	2	0		0.251741	18	12	1	3
hsa-mir-580_0	High	0.0271215	19	11	0	2	Low	0.00853544	7	7	8	5		1	17	16	1	1		0.795644	5	6	6	4		1	16	17	1	0		1	17	16	1	2		0.494665	16	16	2	0		0.129308	19	12	1	3
hsa-mir-581_0		0.191305	6	6	7	2		0.380772	10	8	3	2		1	4	5	7	6		0.117458	9	9	3	2		0.532054	6	4	5	3		0.918386	6	4	5	5		0.521525	7	4	5	4		0.763789	4	5	3	6
hsa-mir-582_0		0.600149	5	5	6	3		0.222732	8	9	3	2		0.845624	4	3	7	6		0.0567053	8	7	3	3		0.229619	5	2	7	4		0.360624	4	3	9	5	High	0.0141278	7	1	8	5		0.634075	4	2	6	8
hsa-mir-583_0		0.400111	4	4	8	4		0.0770308	9	8	3	2		0.850374	5	4	5	7		0.602641	7	9	3	2		0.14937	6	2	6	4		0.515199	5	2	7	7		0.400111	4	4	8	4		1	3	4	6	7
hsa-mir-584_0		1	5	6	3	2		0.413818	7	7	5	2		0.531357	6	8	2	4		1	6	6	3	2		0.894298	7	5	2	2		1	6	6	2	3		0.54196	7	4	3	2		0.392309	3	7	2	2
hsa-mir-585_0		0.120761	5	8	6	1	Ambiguous	0.0242738	8	7	4	2		0.400236	6	9	2	4		0.911785	8	7	3	2		0.703122	7	6	4	2		0.710544	6	8	3	4		0.681917	8	6	3	2		0.760111	6	7	4	2
hsa-mir-586_0		0.285554	6	3	9	7		0.19416	10	8	3	2		0.474285	6	5	8	5		0.73895	9	9	3	2		0.85502	5	4	7	6		0.321075	5	6	8	3		0.722122	5	4	7	5		1	6	7	6	8
hsa-mir-587_0		0.292992	6	2	9	13		0.432393	8	7	4	2		0.83777	2	3	11	9		0.84898	9	7	3	2		0.850578	4	3	8	10		1	3	4	9	8		0.543195	4	2	10	8		0.336686	3	2	12	11
hsa-mir-588_0		0.774896	4	2	9	11		0.708299	7	7	4	2		1	2	2	10	9		0.464602	7	6	3	3		0.836994	3	2	9	8		0.681917	2	3	9	6		0.563588	3	1	10	9		0.81468	2	2	11	11
hsa-mir-589_0		0.248869	17	12	1	1		0.453932	6	7	7	4		1	14	14	1	1		1	5	5	6	4		0.114844	16	13	2	0		0.162278	18	14	1	0		0.0635327	16	10	2	1		0.246552	16	11	1	2
hsa-mir-590_0		0.40137	7	10	4	1		0.166482	8	9	5	2		0.52538	7	11	4	3		0.687572	7	7	5	3		0.142134	6	11	5	1		0.235091	8	12	5	1		0.405769	9	12	4	1		0.595499	9	11	5	2
hsa-mir-591_0		0.405769	9	9	4	1		0.0930077	8	8	4	3		0.0658174	6	13	5	1		1	8	6	4	3		0.0961668	5	12	4	1		0.52538	7	11	4	3		0.645239	9	12	2	1		0.620429	12	8	2	3
hsa-mir-592_0		0.164593	7	5	6	2		0.165576	9	8	3	2		1	7	8	5	4		1	8	7	3	2		0.823831	5	7	3	2		1	8	8	4	4		1	9	8	2	2		0.139401	10	5	4	4
hsa-mir-593_0		0.164593	7	5	6	2		0.165576	9	8	3	2		1	7	8	5	4		1	8	7	3	2		0.823831	5	7	3	2		1	8	8	4	4		1	9	8	2	2		0.139401	10	5	4	4
hsa-mir-595_0		0.13341	10	5	5	3		0.2633	9	8	3	2		0.465675	6	9	6	3		1	8	9	3	2		0.920894	9	7	4	4		0.288947	9	10	6	2		0.716098	11	8	3	3		0.586386	9	7	3	3
hsa-mir-596_0		0.0720609	1	2	18	11		0.702536	6	7	6	4		0.746988	1	1	16	13		0.426965	6	6	5	5		0.248324	3	0	12	16		0.803697	2	1	14	13		0.137934	4	0	12	14		0.732871	1	3	11	11
hsa-mir-597_0		0.620481	1	2	16	13		0.701973	6	7	6	4		1	1	1	15	14		0.360198	6	6	5	5		0.234308	3	0	13	17		0.60406	2	1	16	14		0.141084	4	0	13	14		0.282513	1	3	10	15
hsa-mir-598_0		0.620481	1	2	16	13		0.780501	6	7	6	4		0.863763	1	1	16	14		0.417453	6	6	5	5		0.234308	3	0	13	17		0.60406	2	1	16	14		0.184461	4	0	13	15		0.282513	1	3	10	15
hsa-mir-599_0		0.73281	12	14	3	1		0.372055	7	8	4	3		0.112295	16	9	1	4		0.0580902	7	7	5	3		0.150324	12	13	4	0		0.445626	13	12	3	1	High	0.00474369	18	8	2	4		0.335979	14	13	0	3
hsa-mir-600_0		0.906577	5	3	4	4		0.587653	10	8	4	2		0.507972	3	5	3	5	Low	0.0495423	8	9	3	2		0.921934	5	5	7	5		0.521525	7	4	5	4	Low	0.0323963	2	8	3	5		0.270068	8	6	6	3
hsa-mir-601_0		0.906577	5	3	4	4		0.587653	10	8	4	2		0.507972	3	5	3	5	Low	0.0495423	8	9	3	2		0.921934	5	5	7	5		0.521525	7	4	5	4	Low	0.0323963	2	8	3	5		0.270068	8	6	6	3
hsa-mir-602_0		0.691704	7	4	3	4		1	8	8	5	2		0.754431	5	5	2	4		0.0679172	9	8	3	3		0.352117	5	5	7	3		0.559356	8	6	5	3		0.274677	3	7	3	4	Low	0.0443022	8	7	6	1
hsa-mir-603_0		0.858442	5	4	9	8		0.518554	10	9	3	2		1	5	4	9	9		0.692736	9	8	3	3		0.1724	7	3	9	7		0.394561	6	3	9	8		0.133109	6	1	8	9		0.782944	6	5	5	7
hsa-mir-604_0		0.84898	4	3	8	7		0.617851	9	8	3	2		0.529599	5	3	6	9		0.84898	8	7	3	2		0.119096	7	2	7	6		0.255103	7	3	8	7		0.602872	5	2	7	8		0.65342	5	4	4	7
hsa-mir-605_0		0.672829	2	3	8	5	Low	0.0215813	7	7	4	2		0.12336	1	6	6	6		1	6	7	3	3		0.830356	2	4	7	6		0.834597	2	3	9	7		0.63601	2	4	7	5		0.653866	4	4	7	6
hsa-mir-606_0		0.648314	3	5	6	4	Ambiguous	0.00887191	9	8	3	2		0.785335	3	5	6	6		0.289947	9	9	3	2		0.622449	3	6	7	6		1	3	3	9	8		0.722122	3	5	6	7		0.914692	5	4	4	6
hsa-mir-607_0		0.290123	3	4	9	4		0.0768667	7	6	3	3		0.436987	2	5	9	6		0.728163	6	7	5	2		0.393521	1	4	9	6		0.454933	1	3	10	7		0.681917	2	3	6	8		0.531013	2	5	7	5
hsa-mir-608_0		0.465881	3	5	8	4		0.152221	9	6	3	3		0.178294	2	7	9	5		0.457333	7	8	5	2		0.393521	1	4	9	6		0.209468	1	5	10	7		0.710544	3	4	6	8		0.37339	2	6	6	5
hsa-mir-609_0		0.228938	4	4	9	4	Low	0.0243914	8	8	4	2		0.529599	3	5	9	6		0.465675	7	7	3	3		0.681917	2	3	9	6		0.687572	2	3	10	7		0.64714	4	2	6	8		0.0969613	1	7	7	5
hsa-mir-610_0		0.845624	4	3	7	6		0.648114	9	8	4	2		0.0830594	6	3	3	10		0.359207	7	8	3	2		0.163314	7	2	4	7		0.371043	6	2	6	7		0.596246	5	2	6	8		0.921624	4	6	5	6
hsa-mir-611_0		0.178242	1	6	4	3		0.552494	9	8	4	3		0.507972	3	5	3	5		0.24729	7	7	4	2		0.460167	6	6	1	4		0.659406	4	6	2	3		1	5	6	2	2		1	5	6	3	3
hsa-mir-612_0		0.483557	3	6	5	3		0.23656	9	8	4	3		0.850374	5	6	4	5		0.504769	7	7	4	2		0.393521	9	6	1	4		0.830356	7	6	2	4		0.898213	8	6	2	2		0.465267	9	6	3	4
hsa-mir-613_0		0.734204	5	6	8	5		0.0587183	10	7	3	2	Low	0.0337649	2	10	8	4		0.925058	8	9	3	2		0.394561	3	6	8	9		0.111651	2	8	8	5		0.860774	5	6	8	6		0.522038	7	4	5	6
hsa-mir-614_0		0.734204	5	6	8	5		0.0587183	10	7	3	2	Low	0.0348367	2	10	7	4		0.549576	8	9	3	2		0.543103	3	6	8	8		0.111651	2	8	8	5		0.860774	5	6	8	6		0.404322	7	4	5	5
hsa-mir-615_0	High	0.0454314	13	7	2	0		0.754578	8	7	4	3		0.631932	6	8	1	2		0.568034	5	6	3	4		0.488037	9	5	2	2		0.898213	6	8	2	2		1	8	9	2	1		0.0819404	9	5	0	4
hsa-mir-616_0		0.218321	12	7	2	1		0.200417	9	8	4	2		1	7	7	2	3		1	8	7	3	4	High	0.0451293	11	4	3	2		1	7	7	3	3		0.408563	9	7	3	1		0.294556	7	6	1	5
hsa-mir-617_0		0.0786946	10	5	2	0		0.425139	7	7	5	3		1	7	7	2	2		0.681917	4	6	5	3	High	0.0424259	9	2	1	2		1	6	6	2	1		0.672829	8	5	2	2		0.650933	7	5	1	3
hsa-mir-618_0		0.0786946	10	5	2	0		0.425139	7	7	5	3		1	7	7	2	2		0.681917	4	6	5	3	High	0.0424259	9	2	1	2		1	6	6	2	1		0.672829	8	5	2	2		0.650933	7	5	1	3
hsa-mir-619_0	Ambiguous	0.01529	9	5	4	0		1	8	8	4	3		0.830356	7	6	3	2		0.447383	5	7	4	3	High	0.0341233	9	2	1	4		1	5	5	2	2		0.389583	8	5	4	2		0.339213	8	5	1	4
hsa-mir-620_0	Ambiguous	0.0171054	10	6	4	0		1	8	7	5	3		0.898213	8	6	2	2		0.687572	5	7	4	3	High	0.0171424	10	2	1	3		1	6	7	2	2		0.389583	8	5	4	2		0.729433	7	6	1	3
hsa-mir-621_0		0.872767	1	1	14	12		0.86275	5	6	8	3		0.144856	0	2	17	11		0.433372	4	5	6	5		0.494096	1	2	15	11		1	1	2	13	12		0.631932	1	2	12	14		0.133659	3	0	10	11
hsa-mir-622_0		0.620481	2	1	15	13		1	6	7	4	2		0.246982	1	4	16	11		1	5	6	3	3		0.812543	2	2	13	10		0.563166	2	3	10	13		0.539348	2	4	13	9		1	2	2	9	11
hsa-mir-623_0		0.381404	4	1	13	13		1	8	7	4	2		0.229619	2	5	16	10		0.913703	7	7	3	3		0.332591	2	3	14	9		0.714739	3	3	9	12		0.21416	2	5	14	8		0.59559	4	2	8	11
hsa-mir-624_0		1	10	9	2	2		0.200744	9	7	4	2		0.836994	9	8	3	2		1	6	8	3	2		1	11	10	2	2		0.339014	12	7	2	3		0.83777	11	9	2	3	High	0.0147445	15	6	3	4
hsa-mir-625_0		0.80915	8	7	2	1		0.505259	7	7	7	5		1	6	7	1	1		0.544586	5	6	6	4		1	6	7	1	0		0.631932	8	6	2	1		0.620481	5	8	2	1		0.115461	10	4	1	3
hsa-mir-626_0		1	2	2	6	7		1	8	9	4	3		0.674888	3	4	6	3		1	5	8	6	3		0.0739935	5	1	7	4	Ambiguous	0.0412941	4	1	7	2		0.431812	1	3	8	5		0.892875	3	3	4	3
hsa-mir-627_0		1	2	2	6	7		1	8	9	4	3		0.674888	3	4	6	3		1	5	8	6	3		0.0739935	5	1	7	4	Ambiguous	0.0412941	4	1	7	2		0.431812	1	3	8	5		0.892875	3	3	4	3
hsa-mir-628_0		0.80003	4	3	2	4		0.454777	6	8	4	3		1	5	5	3	2		1	4	4	5	3		0.0761003	5	1	5	2		0.498899	3	2	5	2		0.150324	1	4	6	2		0.66621	4	2	2	2
hsa-mir-629_0		0.814222	5	4	3	2		0.768774	6	7	4	3		0.795644	6	5	2	1		0.659406	5	6	3	3		0.0906984	8	2	3	2		0.814222	5	4	3	2		0.80003	2	4	4	3		0.862644	3	3	2	1
hsa-mir-630_0		0.674888	5	4	4	2		0.768774	6	8	4	3		0.531684	6	5	3	1		0.903908	7	6	3	3		0.0772386	8	2	3	3		1	5	4	3	3		0.596835	2	4	5	3		0.862644	3	3	2	1
hsa-mir-631_0		0.391069	5	4	5	2		0.60499	5	8	4	2		1	5	5	3	2		0.476084	7	5	3	3		0.24729	7	2	3	4		1	4	4	3	4		0.814222	2	4	5	4		0.862644	2	3	2	1
hsa-mir-632_0		0.442665	7	3	2	3		0.616607	8	7	4	3		0.640054	6	3	2	2		0.201215	6	7	5	3	High	0.0141179	8	1	3	2	High	0.0328611	8	1	3	3		0.308326	8	4	3	2		0.215284	6	4	0	3
hsa-mir-633_0		0.275578	11	6	1	1		1	6	7	8	3		0.466529	8	7	2	0		0.544586	5	5	6	6		0.313869	9	7	2	0		0.0617784	11	5	1	0		0.872767	9	7	1	1		1	6	7	0	1
hsa-mir-634_0		0.066585	13	6	0	1		0.871734	6	7	9	5		0.536507	9	7	1	0		0.223143	5	5	7	6		0.215152	10	6	1	0	High	0.0121574	12	4	1	0		0.357977	10	7	1	0		0.505476	5	7	0	1
hsa-mir-635_0		0.066585	13	6	0	1		0.871734	6	7	9	5		0.536507	9	7	1	0		0.223143	5	5	7	6		0.215152	10	6	1	0	High	0.0121574	12	4	1	0		0.357977	10	7	1	0		0.505476	5	7	0	1
hsa-mir-636_0		0.0858113	12	5	1	1		0.874373	6	7	9	5		0.347475	9	6	1	0		0.281852	5	5	7	6		0.215152	10	6	1	0	High	0.0305355	12	5	1	0		0.544586	10	6	1	1		0.520397	6	8	0	1
hsa-mir-637_0		0.276295	4	1	7	11		0.220225	9	8	4	3		1	3	2	9	9		0.331079	7	7	5	4		0.156581	4	0	7	10		0.150267	6	1	6	9		0.220183	4	1	6	11	Ambiguous	0.0330964	5	1	9	6
hsa-mir-638_0		0.50419	4	2	7	10		0.763725	8	8	3	3		0.77307	4	2	8	8		0.153917	7	6	5	3		0.0606952	5	0	7	7		0.0815714	7	1	5	6		0.150267	6	1	6	9		0.451232	5	2	6	7
hsa-mir-639_0		0.50419	4	2	7	10		0.515243	9	8	4	3		1	3	2	8	8		0.627483	7	7	5	3		0.395642	4	1	7	7		0.133664	6	1	5	6		0.436987	5	2	6	9		0.0735229	6	1	6	7
hsa-mir-640_0		0.850578	4	3	8	10		0.353755	9	7	3	3		0.690288	3	2	10	8		0.300865	7	7	5	2		0.218929	4	1	9	7	High	0.0215204	6	0	7	7		0.602872	5	2	7	9		0.487418	4	2	8	8
hsa-mir-641_0		0.209941	11	5	4	5		0.0999994	9	8	3	2		0.921357	10	8	4	4		0.216854	8	9	3	2		0.444021	8	8	5	2		0.714739	10	7	3	3		0.642774	8	7	4	7		0.58171	9	6	4	6
hsa-mir-642_0		0.722122	8	5	4	5	Ambiguous	0.0403796	9	8	3	2		0.410934	9	5	4	4		0.519811	9	9	3	2		0.622449	6	7	6	3		1	7	6	4	4		0.725685	6	5	4	7		0.505643	7	4	4	5
hsa-mir-643_0		0.146478	9	4	5	4		0.722326	9	8	3	2		0.386857	9	5	3	6		1	9	9	3	2		0.622449	6	8	6	3		1	7	8	4	4		0.403089	6	7	4	7		0.619225	7	5	5	5
hsa-mir-644_0		0.754622	15	12	1	1		1	6	7	6	5		0.331889	13	17	1	0		1	5	5	6	4		0.310155	14	18	1	0		0.467214	16	13	2	1		0.321245	15	16	0	2		0.894298	15	13	1	2
hsa-mir-645_0		0.494096	15	11	1	2		0.714634	6	7	6	3		0.65538	13	15	2	0		1	5	5	5	5		0.302943	12	16	2	0		0.483069	15	12	2	1		1	14	13	1	2		0.867369	14	12	1	1
hsa-mir-646_0		0.814173	12	10	1	2		1	6	7	6	3		0.54873	11	13	2	0		1	5	5	5	5		0.302943	12	16	2	0		0.383827	15	11	2	1		0.80915	14	12	1	2		1	12	12	1	1
hsa-mir-647_0		0.875029	13	11	1	1		0.720935	6	7	7	5		1	13	14	1	0		0.525602	5	5	6	5		0.525602	13	16	1	0		0.483069	15	12	2	1		0.426965	13	13	0	2		0.867369	14	12	1	1
hsa-mir-648_0		0.48281	5	2	4	6		0.671611	9	9	4	2		0.496613	4	3	7	4		0.389583	9	8	3	3		0.840143	4	3	5	7		0.548563	5	3	7	5		1	3	4	5	5		0.698264	3	4	5	7
hsa-mir-649_0		0.613602	6	3	5	7		0.716268	10	8	3	2		0.734204	5	6	8	5		0.0637212	9	9	3	2		0.85502	4	5	8	6		0.633524	5	5	8	5		0.622449	3	6	7	6		0.669284	5	5	5	8
hsa-mir-650_0		0.163815	12	6	1	1		0.4846	7	7	5	3		0.479446	9	10	0	2		0.812543	6	5	5	3		0.330881	7	11	3	1		0.643832	8	11	2	1		0.397253	7	12	2	1		0.817958	8	11	2	2
hsa-mir-653_0		0.415302	11	9	3	1		0.147031	8	8	4	3		0.223375	7	12	4	1		0.690288	8	6	4	3		0.213946	6	12	3	1		0.52538	7	11	4	3		0.550521	10	12	2	0		0.220199	13	7	2	3
hsa-mir-654_0		1	8	8	4	3		0.821458	7	7	3	3		0.393521	6	9	4	1		0.336168	8	7	3	2		1	7	7	2	3		0.920894	9	7	4	4		0.436987	6	9	5	2		0.162158	10	6	3	2
hsa-mir-655_0		1	8	8	4	3		0.821458	7	7	3	3		0.393521	6	9	4	1		0.336168	8	7	3	2		1	7	7	2	3		0.920894	9	7	4	4		0.436987	6	9	5	2		0.162158	10	6	3	2
hsa-mir-656_0		1	8	8	4	3		0.821458	7	7	3	3		0.393521	6	9	4	1		0.336168	8	7	3	2		1	7	7	2	3		0.920894	9	7	4	4		0.436987	6	9	5	2		0.162158	10	6	3	2
hsa-mir-657_0		0.167497	13	7	1	1		0.875029	6	7	9	5		1	9	9	1	0		0.763493	5	5	7	6		0.223143	11	7	1	0	High	0.0328649	13	6	1	0		0.275578	11	6	1	1		1	8	8	0	1
hsa-mir-658_0		0.812543	2	1	8	10		0.729141	5	6	6	3		0.643832	1	2	11	8		0.114975	4	5	6	5		1	1	2	9	8		0.217852	1	2	13	7		0.445626	1	3	9	6		0.548568	2	1	6	10
hsa-mir-659_0		0.812543	2	1	8	10		0.729141	5	6	6	3		0.643832	1	2	11	8		0.114975	4	5	6	5		1	1	2	9	8		0.217852	1	2	13	7		0.445626	1	3	9	6		0.548568	2	1	6	10
hsa-mir-661_0		0.620481	15	13	2	1		0.30904	8	8	6	3		0.0653705	16	10	0	4	Low	0.0261548	6	7	5	4		0.157261	16	11	2	1		0.216697	15	12	3	1		0.224877	17	11	1	3		0.296342	17	14	0	3
hsa-mir-662_0	High	0.0319786	8	1	3	6		0.379495	10	8	3	3		0.358614	8	4	2	4	Low	0.0172551	7	8	5	3	High	0.0396356	8	4	1	8	High	0.0208746	8	1	5	4	High	0.0391173	6	4	1	8		0.843957	5	7	5	4
hsa-mir-663_0		0.228938	14	9	4	4		0.85502	10	8	3	2		0.769284	13	11	2	4	Ambiguous	0.0324688	8	8	3	3		0.436823	10	13	3	4		0.0641038	15	7	2	6		0.110653	14	9	1	6		0.913415	12	9	3	4
hsa-mir-663b_0		0.650053	2	4	3	4		0.142465	7	8	4	2		0.814222	6	4	2	3		0.119537	6	6	4	3		0.640054	6	3	2	2		0.273597	7	3	1	3		0.203498	6	3	1	5		0.394798	3	7	2	2
hsa-mir-664_0		0.112299	13	8	3	1		1	8	8	5	2		0.606069	8	9	2	4		0.397253	7	7	3	3		0.836994	10	8	2	3		0.690288	11	8	2	3		0.539348	13	9	2	4		0.447755	10	11	1	3
hsa-mir-665_0		1	8	8	4	3		0.821458	7	7	3	3		0.393521	6	9	4	1		0.336168	8	7	3	2		1	7	7	2	3		0.920894	9	7	4	4		0.436987	6	9	5	2		0.162158	10	6	3	2
hsa-mir-668_0		1	8	8	4	3		0.821458	7	7	3	3		0.393521	6	9	4	1		0.336168	8	7	3	2		1	7	7	2	3		0.920894	9	7	4	4		0.436987	6	9	5	2		0.162158	10	6	3	2
hsa-mir-671_0		0.130453	11	5	4	4		0.160434	9	8	3	2		0.529599	6	9	5	3		1	8	9	3	2		1	8	8	4	4		0.443062	10	10	5	2		0.716098	11	8	3	3		0.239147	10	6	4	3
hsa-mir-675_0		0.672829	2	3	5	7		1	7	8	5	2		0.206116	2	4	4	8		1	7	6	4	3		0.242342	5	2	4	8		0.311607	3	1	5	9		0.63601	4	2	5	7		0.150116	1	6	8	5
hsa-mir-708_0		0.911785	6	8	3	3		0.0667801	7	8	5	3		0.436823	5	9	4	3		0.220183	8	7	4	2		0.405769	12	9	1	4		1	8	9	3	3		0.406386	10	7	4	2		0.629337	10	8	2	3
hsa-mir-7-1_0		0.34054	5	2	4	7		0.595338	10	8	3	2		1	3	3	5	6	Low	0.0281686	7	9	3	2		0.617622	4	4	8	5		0.175564	7	2	5	5		0.268334	2	6	5	5		0.157735	7	4	6	3
hsa-mir-7-2_0		0.202356	6	4	7	3		0.364546	9	9	4	2		0.400111	8	4	4	4		1	8	8	3	3		0.0589024	9	2	3	5		0.916874	7	5	4	4		0.840143	4	3	6	5		0.553372	4	5	3	1
hsa-mir-720_0	High	0.0305355	13	5	0	1		0.527254	6	7	7	4		1	9	9	2	1		0.900758	5	5	5	5		1	10	9	1	2		0.812543	10	8	1	2		0.763493	9	12	1	1		0.208858	13	7	1	2
hsa-mir-7-3_0		0.40137	4	1	7	10		0.366146	9	8	4	3		1	3	2	9	9		0.331079	7	7	5	4		0.142302	4	0	7	9		0.0919925	6	1	5	9		0.140569	4	1	5	11		0.0617793	5	1	8	6
hsa-mir-744_0		0.310212	4	3	12	8		0.22755	8	7	3	3		0.774896	2	4	11	9		0.544183	8	7	4	2		0.479121	4	1	8	10		0.714739	4	3	11	9		0.688179	6	4	6	8		0.245195	2	4	10	5
hsa-mir-758_0		1	8	8	4	3		0.821458	7	7	3	3		0.393521	6	9	4	1		0.336168	8	7	3	2		1	7	7	2	3		0.920894	9	7	4	4		0.436987	6	9	5	2		0.162158	10	6	3	2
hsa-mir-760_0		0.27248	9	4	3	5		0.908539	10	8	3	2		0.850374	6	5	5	4		0.237024	8	9	3	2		0.108349	8	5	6	2		0.100937	8	4	6	3		0.142565	9	3	4	5		0.333258	7	3	4	6
hsa-mir-765_0		0.066585	16	9	0	0		0.449709	6	7	9	5		0.762554	13	11	0	0		0.130844	5	5	7	6		0.36603	12	9	1	0		0.281852	14	9	1	1		0.347475	16	12	0	0		0.873166	12	10	1	0
hsa-mir-769_0		0.425938	8	4	5	5		0.08915	9	8	3	2		0.316536	9	4	4	5		0.410934	9	9	3	2		0.528101	6	6	6	3		0.916874	7	5	4	4		0.489831	6	4	4	8		0.333017	7	3	4	6
hsa-mir-770_0		1	8	8	4	3		0.821458	7	7	3	3		0.393521	6	9	4	1		0.336168	8	7	3	2		1	7	7	2	3		0.920894	9	7	4	4		0.436987	6	9	5	2		0.162158	10	6	3	2
hsa-mir-802_0		0.207748	5	1	3	5		1	7	8	4	3		0.472835	3	1	7	5		0.777861	8	5	3	4		0.182587	6	2	3	7		0.502989	6	3	5	4		0.0616597	5	1	2	7		0.510627	4	2	4	3
hsa-mir-873_0		0.550521	2	0	10	12		0.88838	4	6	6	3		0.43696	0	2	11	11		0.546695	6	4	5	6		1	2	1	10	11		0.560678	3	1	10	13		0.236851	3	1	6	11		0.899868	2	1	8	9
hsa-mir-874_0		0.697309	5	4	5	3		0.269818	10	7	3	2		0.585676	6	6	2	5		1	7	8	3	2		0.112716	8	3	4	2		0.63601	7	5	2	4		0.691704	6	5	4	2		0.902614	4	6	3	3
hsa-mir-875_0		0.73281	12	14	3	1		0.372055	7	8	4	3		0.112295	16	9	1	4		0.0580902	7	7	5	3		0.150324	12	13	4	0		0.445626	13	12	3	1	High	0.00474369	18	8	2	4		0.335979	14	13	0	3
hsa-mir-876_0		0.550521	2	0	10	12		0.697899	4	6	6	3		0.598169	0	2	12	11		0.762554	6	4	5	6		1	2	1	11	11		0.737899	3	1	11	13		0.330881	3	1	7	11		0.719629	2	1	9	9
hsa-mir-877_0		0.845624	3	4	6	7		0.76004	9	8	3	2		0.712257	5	4	6	4		0.239369	7	8	4	2		0.843049	5	4	5	4		0.09672	3	6	6	1		0.322312	2	6	6	4		0.924365	4	6	5	6
hsa-mir-885_0		0.266466	4	2	10	6		0.900869	7	8	5	3		0.83777	4	2	9	10		0.072986	7	6	5	4		0.102258	4	0	8	7		0.266466	5	1	8	8	Low	0.0185756	4	1	11	5		0.274116	4	1	7	12
hsa-mir-886_0		0.476084	4	3	6	3	Low	0.0351177	8	8	3	2		0.600149	5	5	3	6		1	8	7	3	2		0.192327	6	2	5	3		1	5	4	4	5		0.906577	4	4	5	3		0.812183	2	4	4	4
hsa-mir-887_0		0.620481	16	13	1	2	Low	0.0492358	7	7	6	2		0.355558	13	17	2	2		1	5	6	4	3		0.569678	15	16	2	0		1	16	15	2	2		1	15	15	2	1		0.161303	18	12	2	4
hsa-mir-889_0		1	8	8	4	3		0.821458	7	7	3	3		0.393521	6	9	4	1		0.336168	8	7	3	2		1	7	7	2	3		0.920894	9	7	4	4		0.436987	6	9	5	2		0.162158	10	6	3	2
hsa-mir-9-1_0	High	0.0305355	17	9	0	0		0.449709	6	7	9	5		0.762554	13	11	0	0		0.130844	5	5	7	6		0.227056	13	9	1	0		0.163815	15	9	1	1		0.202747	17	12	0	0		0.533486	13	10	1	0
hsa-mir-9-2_0		0.142565	4	5	9	3	Ambiguous	0.0319034	9	8	3	2		0.921934	5	5	5	7		0.916874	7	9	3	2		0.255522	6	2	6	5		0.602872	5	2	7	8		0.722122	5	4	7	5		1	3	4	6	7
hsa-mir-920_0		0.378048	7	9	7	3		0.0829114	10	8	3	2		0.862606	8	10	6	5		0.812317	9	9	3	2		1	8	8	6	7		0.862606	7	9	6	5		0.73895	10	8	6	5		0.33279	11	6	4	5
hsa-mir-921_0		0.0689935	14	8	1	0		0.452256	6	7	7	4		1	10	11	1	0		0.281852	5	5	5	5		0.474708	9	8	2	0		0.814173	10	9	2	1		0.223143	14	10	1	0		0.427822	8	10	2	0
hsa-mir-922_0		0.138247	11	6	0	2		0.115038	8	9	4	2		1	9	10	3	3		0.36651	9	7	3	3		1	9	8	3	3		0.298095	11	6	3	3		1	9	9	2	3		0.0769459	12	6	1	5
hsa-mir-924_0		0.544183	6	3	7	10		0.421767	8	8	4	2		1	4	4	8	7		1	8	8	3	2		0.154131	7	2	7	7		0.692736	6	4	7	9		0.913703	3	3	7	9		0.165085	2	3	11	6
hsa-mir-92a-1_0		0.620481	2	1	15	13		1	6	7	4	2		0.246982	1	4	16	11		1	5	6	3	3		0.812543	2	2	13	10		0.563166	2	3	10	13		0.539348	2	4	13	9		1	2	2	9	11
hsa-mir-92b_0	High	0.0305355	17	9	0	0		0.449709	6	7	9	5		0.762554	13	11	0	0		0.130844	5	5	7	6		0.227056	13	9	1	0		0.163815	15	9	1	1		0.202747	17	12	0	0		0.533486	13	10	1	0
hsa-mir-93_0		0.27868	10	9	4	1		0.0930077	8	8	4	3		0.105929	7	13	5	1		1	8	6	4	3		0.144721	6	12	4	1		0.716098	8	11	4	3		0.814173	10	12	2	1		0.472947	13	8	2	3
hsa-mir-9-3_0		0.202356	6	4	7	3		0.364546	9	9	4	2		0.400111	8	4	4	4		1	8	8	3	3		0.0589024	9	2	3	5		0.916874	7	5	4	4		0.840143	4	3	6	5		0.553372	4	5	3	1
hsa-mir-933_0		0.0975816	8	3	0	2		0.43048	6	7	7	5		1	7	7	1	0		0.812543	5	5	6	5		0.357977	10	7	1	0		0.80915	9	7	1	2		1	8	8	1	1		0.487712	9	6	2	1	High
hsa-mir-935_0		0.284161	9	4	3	3		0.198083	9	7	4	2		0.37274	9	5	2	4		1	7	8	3	2		0.830356	6	8	3	2		0.834597	7	8	2	3		0.190061	6	7	2	6		0.716458	7	5	4	5
hsa-mir-936_0		0.228938	4	4	9	4	Low	0.0243914	8	8	4	2		0.529599	3	5	9	6		0.465675	7	7	3	3		0.681917	2	3	9	6		0.687572	2	3	10	7		0.64714	4	2	6	8		0.0969613	1	7	7	5
hsa-mir-937_0		0.620481	15	13	2	1		0.30904	8	8	6	3		0.0653705	16	10	0	4	Low	0.0261548	6	7	5	4		0.157261	16	11	2	1		0.216697	15	12	3	1		0.224877	17	11	1	3		0.296342	17	14	0	3
hsa-mir-938_0		0.84898	4	3	8	7		0.617851	9	8	3	2		0.529599	5	3	6	9		0.84898	8	7	3	2		0.119096	7	2	7	6		0.255103	7	3	8	7		0.602872	5	2	7	8		0.65342	5	4	4	7
hsa-mir-939_0		0.869131	15	13	1	1		0.499362	6	8	6	3		0.0888026	16	10	0	3		0.0546139	6	6	5	4		0.157261	16	11	2	1		0.216697	15	12	3	1		0.105844	17	11	0	3		0.412345	17	14	0	2
hsa-mir-940_0	High	0.0409511	9	2	2	5		0.531328	10	7	3	3		0.898213	8	6	2	2		0.207446	7	8	5	3		0.0791137	8	5	1	7	High	0.0135361	9	1	4	4		0.0815714	6	5	1	7		0.645637	5	7	5	3
hsa-mir-941-1_0		0.875029	13	11	1	1		0.720935	6	7	7	5		1	13	14	1	0		0.525602	5	5	6	5		0.525602	13	16	1	0		0.483069	15	12	2	1		0.426965	13	13	0	2		0.867369	14	12	1	1
hsa-mir-941-2_0		0.875029	13	11	1	1		0.720935	6	7	7	5		1	13	14	1	0		0.525602	5	5	6	5		0.525602	13	16	1	0		0.483069	15	12	2	1		0.426965	13	13	0	2		0.867369	14	12	1	1
hsa-mir-941-3_0		0.875029	13	11	1	1		0.720935	6	7	7	5		1	13	14	1	0		0.525602	5	5	6	5		0.525602	13	16	1	0		0.483069	15	12	2	1		0.426965	13	13	0	2		0.867369	14	12	1	1
hsa-mir-942_0		0.580717	6	3	4	4	Low	0.0241692	8	8	3	2		0.840143	3	4	7	5		0.308543	8	7	3	2		0.142565	4	5	9	3		0.303936	3	5	6	2		0.596246	5	2	6	7		0.200809	5	2	3	8
hsa-mir-943_0		0.570254	5	2	4	5		0.674888	8	8	3	2		0.906577	5	3	4	4		0.496613	8	7	4	2		1	3	4	4	4		1	5	4	3	3		0.333714	1	5	3	3		0.600057	5	3	2	4
hsa-mir-944_0	High	0.0348615	13	5	1	2		0.106289	8	9	4	3		1	10	9	3	3		1	7	7	5	4		0.40137	10	7	1	4		0.0961668	12	5	1	4		0.687473	10	9	1	3		0.0601268	13	6	1	3
hsa-mir-95_0		0.423268	7	3	4	5		0.678625	10	8	3	2		0.777861	5	3	5	5		0.528101	8	9	3	2		0.843049	4	5	6	4		0.777861	5	5	5	3		0.446858	2	5	3	4		0.668422	5	3	3	4
hsa-mir-96_0		0.130247	5	8	2	2		0.0841969	9	7	3	2		0.677983	9	10	3	2		1	8	8	3	2		0.823831	7	14	2	2.37605		1	8	10	4	2.66856		0.902196	8	10	2	2.42117		0.153324	11	5	3	4
hsa-mir-99a_0		0.460167	1	12	6	1.36407		0.517988	6	5	4	2		0.116819	2	8	5	2		0.23711	5	6	4	2		0.77307	2	10	8	1.68067		0.216388	3	7	6	2		0.769284	2	11	7	2.37007		0.52029	4	2	6	6
hsa-mir-99b_0		0.118726	3	8	4	2		0.452538	9	7	3	3		0.375872	4	11	6	1.6587		0.845624	7	8	5	2		0.528101	6	10	3	1.65745		1	7	12	4	0.991103		0.425938	5	13	8	2		0.235428	7	3	5	5
[truncated: 59 more columns]

## Sheet: Supplemental Table 4
Supplemental Table 4 - miRNAs significantly differentially expressed across 18 drugs
miRNA	AZ628	AZD0530	Cyclopamine	Erlotinib	Geldanamycin	Go6976	HKI-272	Imatinib	MG-132	MK-0457	Paclitaxel	PD173074	PF-2341066	PHA665752	Rapamycin	Sorafenib	Sunitinib	TAE684
hsa-let-7b	0.313309	0.874514	0.301791	0.951565	0.817457	0.375175	0.706474	0.893695	0.375175	0.375175	0.429741	0.706474	0.584605	0.970928	0.874514	0.970928	0.268947	0.029665
hsa-let-7c	0.836385	0.0823522	0.349575	0.635656	0.313309	0.290559	0.706474	0.279611	0.229102	0.458668	0.388399	0.0424832	0.724614	0.458668	0.874514	0.990307	0.0912951	0.268947
hsa-let-7f	0.0231034	0.912937	0.148278	0.761352	0.779931	0.388399	0.990307	0.488655	0.990307	0.990307	0.912937	0.117086	0.290559	0.388399	0.874514	1	0.779931	0.653082
hsa-let-7g	0.635656	0.761352	0.0400675	0.488655	0.836385	0.6885	0.0630725	0.817457	0.584605	0.817457	0.932231	0.670699	0.177512	0.6885	0.951565	0.724614	0.279611	0.279611
hsa-let-7i	0.932231	0.415684	0.325112	0.893695	0.584605	0.375175	0.313309	0.779931	0.912937	0.488655	0.375175	0.401902	0.248466	0.855407	0.313309	0.210837	0.141579	0.0156276
hsa-mir-1	0.990171	0.718853	0.363437	0.384421	0.543014	0.437703	0.697452	0.452387	0.562603	0.243312	0.605976	0.130882	0.11312	0.0414759	0.309256	0.795163	0.796979	1
hsa-mir-100	0.0741222	0.480895	0.644219	0.00536848	0.0595108	0.0260941	0.0423271	0.473197	0.388327	0.503471	0.313236	0.855299	0.148125	0.228926	0.618416	0.0781435	0.0355148	0.0253439
hsa-mir-105	0.0974783	0.565779	0.669358	0.433403	0.914374	0.86166	0.402702	0.86166	0.213428	0.144499	0.358181	0.213428	0.703791	0.0267549	0.111481	0.719816	0.22034	0.317632
hsa-mir-106a	0.74291	0.951565	0.128881	0.415684	0.817457	0.970928	0.779931	0.0127603	0.706474	0.0597035	0.219833	0.362233	0.349575	0.488655	1	0.724614	0.141579	0.325112
hsa-mir-106b	0.44407	0.504036	0.6885	0.00430591	0.6885	0.325112	0.313309	0.836385	0.584605	0.932231	0.855407	0.415684	0.504036	0.066597	0.193648	0.219833	0.0136596	0.128881
hsa-mir-10a	0.60141	0.706474	0.990307	0.724614	0.019047	0.106156	0.279611	0.325112	0.00725818	0.0400675	0.106156	0.670699	0.817457	0.74291	0.970928	0.635656	0.185451	0.817457
hsa-mir-10b	0.836263	0.893615	0.618376	0.193581	0.0476013	0.361871	0.0354453	0.401831	0.0296404	0.318534	0.248109	0.81739	0.429566	0.503971	0.429392	0.488326	0.210664	0.361871
hsa-mir-122	0.838928	0.303468	1	0.272014	0.72157	0.535039	0.772568	0.0314474	0.160379	0.33599	0.236574	0.522459	0.895542	0.209892	0.701899	1	0.68848	0.472836
hsa-mir-124	0.281876	0.0515042	0.588189	0.0133974	0.0132577	0.0814594	0.392292	0.0206939	0.957188	0.780294	0.257572	0.763416	0.579083	0.273092	1	0.144205	0.191455	0.760973
hsa-mir-125b	0.0630725	0.761352	0.210837	0.0136596	0.0781547	0.0476852	0.0424832	0.568022	0.219833	0.504036	0.101003	0.568022	0.238646	0.313309	0.6885	0.101003	0.101003	0.117086
hsa-mir-126	0.175543	0.37218	0.951345	0.779476	0.472122	0.0657346	0.153342	0.0449803	0.333153	0.893358	0.082582	0.227622	0.160492	0.518339	0.271238	0.599752	0.275587	0.759406
hsa-mir-127	0.172327	0.172327	0.169226	0.726992	0.323017	0.0881623	0.582281	0.372468	0.0881623	0.90407	0.0881623	0.662538	0.942353	0.601285	0.347182	0.942353	0.0454292	0.726992
hsa-mir-129	0.660716	0.907411	0.23116	0.909581	0.174563	0.00701243	0.29494	0.658741	0.0705233	0.394548	0.0519183	0.198059	0.174563	0.198903	0.00264787	0.84883	0.0567264	0.297932
hsa-mir-130a	0.19348	0.155154	0.324929	0.0278309	0.0562988	0.0399173	0.0423271	0.415067	0.0269795	0.551367	0.044859	0.893679	0.258494	0.324746	0.388381	0.458651	0.0166198	0.473364
hsa-mir-135a	0.679693	0.233949	0.424019	0.741169	0.101074	0.104376	0.565766	0.796817	0.286898	0.0109032	0.057531	0.886478	0.314128	0.420755	0.966492	0.156319	0.741427	1
hsa-mir-136	0.67762	0.0312286	0.887762	0.0785161	0.408432	0.176095	0.0412736	0.691503	0.299976	0.983914	0.9197	0.219356	0.455664	0.162559	0.0451796	0.983914	0.249051	0.455664
hsa-mir-137	0.100149	0.360886	0.268704	0.0131929	0.715328	0.103633	0.508935	0.686537	0.963245	0.20234	0.647786	0.125705	0.530462	0.00486928	0.145344	0.620277	0.965838	0.348144
hsa-mir-138	0.463926	0.105716	0.628296	0.20732	0.689801	0.607134	0.0148755	0.163917	0.47198	0.660716	0.810521	0.516163	0.405575	0.0857824	0.121957	0.330619	0.00602502	0.00295723
hsa-mir-142	0.485253	0.299976	0.00280484	0.198817	0.198817	0.663847	0.983914	0.441622	0.945527	0.572973	0.951768	0.218755	0.986909	0.951768	0.73376	0.615757	0.212347	0.572973
hsa-mir-142	0.273092	0.299976	0.00580105	0.0794095	0.212347	0.408432	0.983914	0.400329	0.972748	0.760973	0.759994	0.342926	0.864372	0.662538	1	0.615757	0.102438	0.760973
hsa-mir-146b	0.12259	0.458073	0.0342945	0.119463	0.534682	0.0777612	0.592491	0.551367	0.0699114	0.617965	0.0779298	0.697085	0.105417	0.473197	0.268586	0.93218	0.162082	0.15862
hsa-mir-146b	0.980769	0.278057	0.385953	0.980769	0.980769	1	0.980769	0.983914	0.824481	0.257255	0.726992	0.570795	0.0738275	0.126651	0.710675	0.408432	0.980769	0.0173859
hsa-mir-148a	0.0247818	0.364837	0.740825	0.00326097	0.0030778	0.00583653	0.0473327	0.778128	0.787011	0.547309	0.0334748	0.873149	0.841823	0.833541	0.286441	0.71254	0.40751	0.740825
hsa-mir-149	0.761458	0.741427	0.814255	0.208378	0.372569	0.0904777	0.136763	0.010122	0.682426	0.581798	0.136763	0.826115	0.156606	0.0429986	0.296403	0.969075	0.766296	0.158959
hsa-mir-151	0.990307	0.362233	0.724614	0.362233	0.0534126	0.779931	0.00966542	0.653082	0.375175	0.893695	0.148278	0.362233	0.568022	0.761352	0.568022	0.761352	0.670699	0.6885
hsa-mir-153	0.609636	0.817776	0.376088	0.00632247	0.165779	0.0638088	0.0790924	0.134052	0.134052	0.658082	0.164517	0.047536	0.657349	0.737223	0.841727	0.249308	0.120077	0.965092
hsa-mir-15b	0.488655	0.375175	0.141579	0.210837	0.951565	0.0597035	0.458668	0.0103689	0.970928	0.670699	0.618429	0.932231	0.101003	0.0246129	0.706474	0.6885	0.836385	0.313309
hsa-mir-17	0.92912	0.989781	0.299513	0.83208	0.770079	0.78165	0.182016	0.0794323	0.307302	0.869698	0.400781	0.0297823	0.214084	0.0253754	0.277832	0.446212	0.105716	0.100758
hsa-mir-17	0.893695	0.951565	0.111515	0.568022	0.817457	0.761352	0.375175	0.0178408	0.74291	0.029665	0.106156	0.279611	0.401902	0.290559	0.6885	0.535547	0.185451	0.185451
hsa-mir-181a	1	0.237341	0.474714	0.184329	0.689806	0.747402	0.328361	0.440756	0.621844	0.175022	0.408706	0.899711	0.710502	0.00368182	0.965092	0.934615	0.886478	0.231801
hsa-mir-181a	0.325112	0.122873	0.817457	0.016702	0.855407	0.618429	0.268947	0.362233	0.635656	0.458668	0.185451	0.504036	0.6885	0.0564852	0.325112	0.951565	0.874514	0.990307
hsa-mir-181d	0.258566	0.653082	0.248466	0.0246129	0.836385	0.375175	0.761352	0.401885	0.44407	0.206422	0.535532	0.752104	0.362233	0.0231034	0.951564	0.761343	0.6885	0.422661
hsa-mir-182	0.918663	0.686537	0.27165	0.333863	0.203919	0.0675662	0.189044	0.440756	0.047536	0.799904	0.209004	0.612229	0.62035	0.960741	0.27165	0.987745	0.954462	0.557772
hsa-mir-182	0.670699	0.990307	0.488655	0.202109	0.122873	0.429741	0.60141	0.706474	0.504036	0.60141	0.798636	0.210837	0.670699	0.836385	0.932231	0.0146144	0.117086	0.111515
hsa-mir-183	0.644332	0.761352	0.817451	0.11426	0.135115	0.274226	0.458668	0.970928	0.504036	0.679566	0.864946	0.408741	0.601396	0.488655	0.941892	0.0178408	0.210819	0.106156
hsa-mir-184	0.63119	0.980769	0.563562	0.299976	0.563562	0.152334	0.980769	0.0359869	0.646786	0.323017	0.299976	0.582281	0.323017	0.980769	0.299976	0.942353	0.563562	0.323017
hsa-mir-18a	0.6885	0.874514	0.0335081	0.504036	0.202109	0.258566	0.473531	0.0315364	0.458668	0.415684	0.473531	0.248466	0.618429	0.458668	0.74291	0.229102	0.653082	0.229102
hsa-mir-18b	0.375175	0.362233	0.0278899	0.893695	0.635656	0.6885	0.618429	0.0450209	0.219833	0.60141	0.248466	0.429741	0.429741	0.155217	0.551667	0.135115	0.74291	0.60141
hsa-mir-191	0.817457	0.301791	0.301791	0.779931	0.618429	0.893695	0.0823522	0.219833	0.798636	0.635656	0.874514	0.817457	0.635656	0.893695	0.584605	0.268947	0.0702822	0.00838483
hsa-mir-192	0.401902	0.706474	0.568022	0.155217	0.0377694	0.00674747	0.210837	0.874514	0.0136596	0.0315364	0.00900482	0.893695	0.177512	0.429741	0.504036	0.798636	0.162399	0.60141
hsa-mir-193a	0.724414	0.0879759	0.618164	0.0315107	0.116311	0.0595108	0.0792729	0.374163	0.436698	0.600639	0.355232	0.970906	0.242898	0.912823	0.0311776	0.48808	0.193312	0.584321
hsa-mir-193b	0.0382859	0.196421	0.705881	0.193312	0.0853026	0.200059	0.582245	0.0577443	0.951345	0.0494388	0.931663	0.912661	0.835028	0.0430697	0.0141696	0.184054	0.705198	0.835871
hsa-mir-194	0.246962	0.336177	0.289024	0.0739147	0.0285549	0.00824768	0.575071	0.670653	0.0149799	0.0503069	0.00294314	0.836043	0.22296	0.62592	0.400905	0.503471	0.219485	0.705881
hsa-mir-195	0.401902	0.16983	0.568022	0.325112	0.388399	0.990307	0.0203239	0.458668	0.301791	0.912937	0.568022	0.177512	0.106156	0.258566	0.990307	0.798636	0.798636	0.258566
hsa-mir-196b	0.428829	0.038167	0.806849	0.318369	0.603605	0.351847	0.950887	0.131498	0.656285	0.222635	0.439342	0.529838	0.911721	0.106582	0.555516	0.921218	0.990171	0.463267
hsa-mir-19a	0.970928	0.551667	0.162399	0.290559	0.44407	0.0564852	0.488655	0.0450209	0.635656	0.44407	0.458668	0.415684	0.429741	0.268947	0.60141	0.912937	0.519668	0.135115
hsa-mir-19b	0.836385	0.670699	0.066597	0.855407	0.44407	0.429741	0.0476852	0.0912951	0.970928	0.0741331	0.229102	0.415684	0.653082	0.0534126	0.990307	1	0.258566	0.0702822
hsa-mir-203	0.297932	0.291554	0.536369	0.0691918	0.0686057	0.00733429	0.0200472	0.750723	0.217717	0.187914	0.0340583	0.578744	0.847644	0.500633	0.386869	0.870495	0.503631	0.253785
hsa-mir-204	0.343318	0.582281	0.156092	0.646786	0.980769	0.63119	0.0173859	0.983914	0.408432	0.646786	0.299976	0.192293	0.0454292	0.615757	0.694489	0.545138	1	0.983914
hsa-mir-205	0.852886	0.762006	0.646019	0.0319291	0.00438122	0.0164707	0.00123609	0.293347	0.162432	0.15342	0.258632	0.873468	0.822362	0.452387	0.318369	0.700372	0.0765412	0.126795
hsa-mir-20a	0.535547	0.504036	0.238646	0.670699	0.653082	0.670699	0.268947	0.029665	0.817457	0.0136596	0.128881	0.128881	0.106156	0.258566	0.836385	0.798636	0.0823522	0.0111176
hsa-mir-20b	0.836385	0.0476852	0.177512	0.990307	0.855407	0.375175	0.429741	0.0156276	0.202109	0.415684	0.122873	0.855407	0.117086	0.162399	0.970928	0.761352	0.122873	0.779931
hsa-mir-211	0.323017	0.152334	0.323017	0.0359869	0.710675	0.980769	0.0738275	0.973446	0.328565	0.323017	0.323017	0.980769	0.563562	0.0738275	0.152334	0.323017	0.176095	0.980769
hsa-mir-214	0.623217	0.0493926	0.323175	0.0826079	0.441622	0.480386	0.646786	0.726992	0.213583	0.102438	0.507913	0.636641	0.805954	0.278057	0.385953	0.662538	1	0.0881623
hsa-mir-215	0.325112	0.473531	0.504036	0.101003	0.0062693	0.00118038	0.185451	0.60141	0.00725818	0.0278899	0.00083548	0.932231	0.238646	0.855407	0.488655	0.893695	0.519668	0.74291
hsa-mir-216a	0.172327	0.0454292	0.323017	0.759994	1	0.172327	0.942353	0.509211	0.509211	0.278057	0.509211	0.980769	0.152334	0.152334	0.980769	0.640108	0.323017	0.257255
hsa-mir-217	0.172327	0.0454292	1	0.526866	0.640108	0.35212	0.526866	0.152334	0.152334	0.646786	0.545138	0.726992	0.582281	0.152334	0.257255	0.299976	0.942353	0.278057
hsa-mir-218	0.602363	0.669779	0.908947	0.12295	0.260894	1	0.129056	0.0391936	0.62478	0.465343	0.528085	0.25637	0.631577	0.567434	0.503631	0.877846	0.415568	0.479788
hsa-mir-221	0.19348	0.980615	0.761265	0.00290664	0.0533226	0.210492	0.0424051	0.761177	0.253302	0.415508	0.210664	0.584548	0.653033	0.38822	0.337201	0.117072	0.436698	0.874467
hsa-mir-222	0.042452	0.627004	0.653033	0.00048834	0.0400375	0.0866116	0.0449885	0.779898	0.543562	0.688455	0.193632	0.932229	0.375103	0.166067	0.238628	0.375157	0.253302	0.388327
hsa-mir-23a	0.343318	0.90407	0.70549	0.147214	0.70549	0.678441	0.0493926	0.951768	0.0607795	0.805954	0.408432	0.303819	0.137862	0.364246	0.0493926	0.691503	0.650185	0.303819
hsa-mir-23a	0.817457	0.155217	0.74291	0.258566	0.0335081	0.0702822	0.568022	0.706474	0.568022	0.874514	0.388399	0.44407	0.970928	0.290559	0.238646	0.128881	0.670699	0.893695
hsa-mir-24	0.551667	0.0127603	0.535547	0.128881	0.0262072	0.106156	0.0127603	0.874514	0.44407	0.415684	0.488655	0.653082	0.60141	0.458668	0.0867306	0.415684	0.362233	0.60141
hsa-mir-24	1	0.405575	0.825039	0.0756819	0.0833267	0.00798226	0.0705233	0.766696	0.529838	0.738541	0.306567	0.520323	0.684363	0.345537	0.0466334	0.116408	0.872768	0.951034
hsa-mir-25	0.932231	0.893695	0.458668	0.337201	0.912937	0.258566	0.670699	0.874514	0.375175	0.248466	0.6885	0.0564852	0.724614	0.568022	0.535547	0.0355844	0.618429	0.60141
hsa-mir-26b	0.429741	0.970928	0.375175	0.401902	0.551667	0.706474	0.724614	0.128881	0.6885	0.337201	0.706474	0.912937	0.519668	0.0315364	0.635656	0.6885	0.375175	0.970928
hsa-mir-27a	0.74291	0.0335081	0.951565	0.0377694	0.00674747	0.0111176	0.0564852	0.855407	0.313309	0.429741	0.148278	0.584605	0.535547	0.779931	0.0741331	0.122873	0.238646	0.375175
hsa-mir-29a	0.0450209	0.912937	0.301791	0.162399	0.653082	0.162399	0.74291	0.551667	0.415684	0.488655	0.970928	0.488655	0.193648	0.74291	0.551667	0.362233	0.951565	0.653082
hsa-mir-29c	0.162399	0.635656	0.202109	0.388399	0.458668	0.874514	0.584605	0.706474	0.429741	0.504036	0.798636	0.193648	0.155217	0.932231	0.836385	0.00341451	0.415684	0.219833
hsa-mir-30a	0.797397	0.0994568	0.183453	0.0779298	0.566258	0.142388	0.064904	0.741351	0.912542	0.669286	0.990287	0.854952	0.797397	0.687154	0.0373649	0.607648	0.175543	0.81633
hsa-mir-30b	0.0504809	0.60141	0.325112	0.16983	0.429741	0.44407	0.0315364	0.193648	0.325112	0.258566	0.0630725	0.401902	0.00229446	0.313309	0.912937	0.488655	0.101003	0.00369101
hsa-mir-30c	0.970928	0.990307	1	0.535547	0.855407	0.504036	0.0867306	0.568022	0.855407	0.258566	0.458668	0.388399	0.0400675	0.44407	0.618429	0.202109	0.0960508	0.0127603
hsa-mir-30d	0.988361	0.275454	0.700971	0.635297	0.715328	0.747022	0.501121	0.914374	0.865825	0.0638088	0.719805	0.528841	0.0222054	0.54	0.047536	0.849584	0.569807	0.289204
hsa-mir-30d	0.279611	0.258566	0.706474	0.74291	0.44407	0.458668	0.375175	0.519668	0.488655	0.128881	0.128881	0.779931	0.029665	0.706474	0.458668	0.0504809	0.279611	0.016702
hsa-mir-31	0.41356	0.360706	0.590657	0.042429	0.599752	0.931806	0.00201832	0.668752	0.854755	0.778583	0.62592	0.383213	0.00907177	0.678613	0.660857	0.405819	0.970745	0.740825
hsa-mir-320a	0.535547	0.0335081	0.0823522	0.16983	0.893695	0.74291	0.101003	0.44407	0.836385	0.429741	0.258566	0.970928	0.635656	0.401902	0.229102	0.618429	0.473531	0.229102
hsa-mir-326	0.440604	0.460297	0.440604	0.928542	0.988361	0.310636	0.568466	0.632442	0.147214	0.0312001	0.0588475	0.763416	0.153438	0.194229	0.421403	0.850961	0.775525	0.531117
hsa-mir-328	0.691503	0.70549	0.0303712	0.891308	0.0132577	0.289975	0.579083	0.289585	0.951768	0.797783	0.169226	0.22522	0.900317	0.372468	0.289975	0.985723	0.00580105	0.79136
hsa-mir-330	0.0359869	0.67762	0.555757	0.0412736	0.776839	0.9197	0.70549	0.762396	0.385953	0.420678	0.694489	0.126651	0.951768	0.192293	0.650185	0.455664	0.957188	0.420678
hsa-mir-335	0.313236	0.444001	0.761317	0.177496	0.122859	0.0345261	0.653033	0.584548	0.258494	0.618416	0.0781098	0.488639	0.697455	0.855386	0.601355	0.325039	0.724574	0.724574
hsa-mir-338	0.545138	0.980769	0.640108	0.0359869	0.563562	0.0738275	0.162559	0.0359869	0.299976	0.149823	0.545138	0.582281	0.601285	0.323017	0.5854	0.678441	0.372468	0.650185
hsa-mir-342	0.415614	0.742872	0.481044	0.893695	0.535486	0.219763	0.0355565	0.415614	0.117072	0.0564479	0.429723	0.584605	0.248395	0.688489	0.779931	0.670699	0.584548	0.290486
hsa-mir-34b	0.385953	0.555757	0.636641	0.385953	0.663847	0.176095	0.0283839	0.759994	0.662538	0.531117	0.70549	0.241376	0.63119	0.485253	0.0607795	0.19795	0.192293	0.168245
hsa-mir-361	0.932231	0.706474	0.0156276	0.155217	0.349575	0.362233	0.836385	0.16983	0.135115	0.185451	0.504036	0.429741	0.0315364	0.177512	0.0741331	0.325112	0.375175	0.44407
hsa-mir-362	0.619905	0.843062	0.400919	0.400919	0.195771	0.014295	0.121089	0.0292782	0.530983	0.602232	0.188697	0.461367	0.424733	0.0541677	0.0141349	0.843062	0.78165	0.210021
hsa-mir-363	0.895542	0.0161102	0.799561	0.57257	0.98861	0.331284	0.7972	0.877584	0.157554	0.0893434	0.320122	0.101074	0.309476	0.424774	0.383836	0.480473	0.668442	0.0625482
hsa-mir-365	0.148278	0.162399	0.60141	0.60141	0.313309	0.429741	0.519668	0.135115	0.855407	0.0867306	0.706474	0.568022	0.990307	0.415684	0.019047	0.0741331	1	0.568022
hsa-mir-369	0.563562	0.0454292	0.347182	0.615757	0.0881623	0.347182	0.980769	0.545138	0.172327	0.90407	0.0881623	0.347182	0.90407	0.152334	0.980769	0.5854	0.0881623	0.942353
hsa-mir-375	0.54709	0.168738	0.591443	0.011783	0.00160798	0.00759252	0.0237292	0.860166	0.0727541	0.165793	0.0069864	0.647786	0.902932	0.875214	0.394237	0.0516059	0.309791	0.133873
hsa-mir-376a	0.431674	0.0942342	0.441622	0.775525	0.22522	0.297434	0.983914	0.887762	0.0394304	0.34476	0.0190701	0.507913	0.53195	0.650185	1	0.182751	0.0865659	0.203907
hsa-mir-376b	0.662538	0.156092	0.408432	0.694418	0.0394304	0.168245	0.662538	0.5854	0.0232476	0.34476	0.00580105	0.719577	0.793439	0.5854	0.983914	0.325023	0.156092	0.505822
hsa-mir-377	0.582281	0.156092	0.662538	0.307546	0.169226	0.19795	0.19795	0.364246	0.0232476	0.90407	0.0454292	0.662538	0.509211	0.793439	0.662538	0.0412736	0.0454292	0.980769
hsa-mir-378	0.87425	0.583409	0.450736	0.511262	0.0125719	0.0699114	0.16151	0.394937	0.128072	0.324929	0.0466797	0.472945	0.495744	0.0910506	0.0257334	0.817077	0.98059	0.362052
hsa-mir-378	0.83208	0.603605	0.391703	0.892535	0.64854	0.543014	0.0664336	0.0166246	0.940871	0.275587	0.458241	0.15342	0.40751	0.151471	0.158714	0.506269	0.666356	0.248313
hsa-mir-379	1	0.0454292	0.601285	0.726992	0.0881623	0.19795	0.347182	0.299976	0.0881623	0.90407	0.0881623	0.347182	0.509211	0.509211	0.601285	0.149823	0.172327	0.545138
hsa-mir-382	0.563562	0.0454292	0.1112	0.554847	0.1112	0.1112	0.726992	1	0.0232476	0.53195	0.0232476	0.455664	0.793439	0.793439	0.431674	0.205501	0.0232476	0.480386
hsa-mir-410	0.973446	0.0454292	0.0454292	0.983914	0.347182	0.563562	1	0.545138	0.172327	0.90407	0.172327	0.601285	0.640108	1	0.600491	0.137862	0.0454292	0.372468
hsa-mir-411	0.601285	0.0454292	0.256895	0.663847	0.431674	0.0454292	0.678441	1	0.299976	0.53195	0.169226	0.455664	0.793439	0.980769	0.343318	0.887762	0.0865659	0.887762
hsa-mir-411	0.985723	0.663847	0.0613858	0.157464	0.694418	0.887762	0.256895	0.480386	0.0668153	0.663847	0.19795	0.385953	0.241376	0.985723	0.579083	1	0.033219	0.0865659
hsa-mir-424	0.724574	0.874495	0.343334	0.0781098	0.111461	0.0912829	0.307496	0.0278663	0.893655	0.893679	0.362161	0.697455	0.177349	0.00340239	0.0721759	0.429671	0.122816	0.31329
hsa-mir-429	0.589714	0.656493	0.489156	0.92912	0.343946	0.927922	0.0904561	0.678989	0.653942	0.526675	0.557731	0.0451741	0.556969	0.700792	0.56436	0.0933671	0.811669	0.528085
hsa-mir-432	0.35212	0.0881623	0.299976	0.726992	0.601285	0.347182	1	0.372468	0.0454292	0.509211	0.172327	0.980769	0.545138	0.980769	0.347182	0.257255	0.0881623	0.694489
hsa-mir-449a	0.973446	0.1112	0.980769	0.646786	0.601285	0.545138	0.662538	0.563562	0.980769	0.0359869	0.582281	0.299976	0.323017	0.0738275	0.678441	0.278057	1	0.545138
hsa-mir-449b	0.162559	0.983914	0.323017	0.372468	0.983914	0.299976	0.431674	0.710675	0.364246	0.0173859	0.176095	0.278057	0.176095	0.793439	0.951768	0.0865659	0.951768	0.0738275
hsa-mir-450a	0.309492	0.423381	0.504008	0.061976	0.649559	0.214084	0.500867	0.124329	0.830685	0.535039	0.682426	0.234931	0.664223	0.00250721	0.334112	0.583745	0.524193	0.279039
hsa-mir-483	0.430528	0.00481316	0.47472	0.258071	0.567434	0.238424	0.400919	0.0609577	0.0244986	0.445795	0.47198	0.217717	0.449033	0.746643	0.372569	0.806044	0.0126678	0.0541677
hsa-mir-484	0.408706	0.726284	0.556523	0.565766	0.393265	0.227803	0.0395488	0.698346	0.597161	0.377766	0.924429	0.491367	0.346074	0.0631738	0.377766	0.68468	0.768753	1
hsa-mir-487b	0.726992	0.0232476	0.22653	0.762396	0.983914	0.1112	0.678441	0.726992	0.0881623	0.9197	0.0454292	0.347182	0.759994	0.615757	0.408432	0.733862	0.156092	0.694489
hsa-mir-492	0.601285	1	0.156092	0.0359869	0.323017	0.545138	0.0173859	0.640108	0.328565	0.176095	0.582281	0.582281	1	1	0.545138	0.601285	0.582281	1
hsa-mir-497	0.384507	0.67762	0.811	0.163113	0.963245	0.985723	0.364796	0.559948	0.543788	0.259591	0.70549	0.611	0.527384	0.12834	0.656963	0.0342915	0.0476755	0.771525
hsa-mir-500	0.907411	0.464825	0.505626	0.0861376	0.851586	0.0896548	0.117916	0.229827	0.340685	0.863767	0.530983	0.581798	0.860166	0.131011	0.0112108	0.78165	0.73434	0.669779
hsa-mir-503	0.383678	0.928542	0.0245832	0.00655206	0.249051	0.173242	0.224949	0.0471041	0.149409	0.440604	0.0572968	0.715585	0.0675966	0.00110064	0.0313724	0.119516	0.163113	0.162174
hsa-mir-503	0.688109	0.990287	0.535007	0.0956115	0.284412	0.125349	0.193059	0.0813802	0.779248	0.687559	0.14699	0.732927	0.109892	0.00309358	0.0120556	0.826366	0.14742	0.400404
hsa-mir-516a	0.257255	1	0.126651	1	0.152334	0.0359869	0.545138	0.152334	0.615757	0.152334	0.0359869	0.973446	0.152334	0.678441	0.299976	0.973446	0.0738275	0.152334
hsa-mir-517a	1	1	0.563562	0.172327	0.601285	1	0.563562	0.0738275	0.0454292	0.980769	1	0.152334	0.0738275	0.640108	0.328565	0.328565	0.563562	0.980769
hsa-mir-518b	0.855009	0.335299	0.0253754	0.272014	0.96802	0.174004	0.969349	0.945138	0.61427	0.596227	0.383926	0.817664	0.0480208	0.0383294	0.0253754	0.0897366	0.0324358	0.676188
hsa-mir-521	0.78958	0.322696	0.0214455	0.0108074	0.427126	0.937579	0.640579	0.00129191	0.939648	0.55034	0.372569	0.729473	0.186134	0.00130451	0.261915	0.672531	0.070575	0.420755
hsa-mir-532	0.714657	0.854755	0.110758	0.125349	0.192705	0.0549506	0.0999208	0.100745	0.503471	1	0.18452	0.616829	0.912542	0.687874	0.0347524	0.723772	0.63458	0.705583
hsa-mir-542	0.192969	0.815949	0.275587	0.188803	0.050151	0.0202751	0.0749406	0.356989	0.72091	1	0.131498	0.666356	0.50858	0.0823983	0.0241759	0.481022	0.795872	0.843202
hsa-mir-551a	0.0277358	0.732634	0.784623	0.274308	0.986909	0.00852589	0.00815429	0.570795	0.596744	0.153438	0.194229	0.739374	0.748034	0.934615	0.111481	0.408432	0.951768	0.366824
hsa-mir-584	0.81932	0.0815609	0.865825	0.0219996	0.440756	0.30668	0.28619	0.331284	0.731017	0.118534	0.759334	0.157554	0.520415	0.140669	0.249123	0.584987	0.529903	0.826786
hsa-mir-589	0.980769	0.545138	0.555757	0.303819	0.793439	0.347182	0.509211	0.323017	0.640108	0.431674	0.1112	0.640108	0.213583	0.257255	0.793439	0.0454292	0.596744	0.169226
hsa-mir-590	0.742816	0.290486	0.18935	0.951529	0.128823	0.0779298	0.162336	0.279248	0.0912462	0.381122	0.0354453	0.874349	0.670465	0.836263	0.100745	0.970906	0.817322	0.893555
hsa-mir-595	0.0738275	0.257255	0.0881623	0.323017	0.0359869	0.152334	0.0359869	0.278057	0.601285	0.323017	0.152334	0.0359869	0.545138	1	1	0.152334	0.328565	0.582281
hsa-mir-604	0.436077	0.536495	0.0166246	0.403635	0.297743	0.891832	0.717571	0.520323	0.980403	0.0373552	0.682066	0.794336	0.248309	0.970609	0.970293	0.572106	0.0473327	0.148063
hsa-mir-625	0.908227	0.200772	0.297094	0.00050852	0.185825	0.00737747	0.00862647	0.989469	0.00891393	0.796817	0.0193343	0.514007	0.535039	0.0382493	0.00897752	0.644118	0.0651503	0.154779
hsa-mir-628	0.385994	0.653865	0.857655	0.0800552	0.658082	0.857655	0.590843	0.872509	0.569807	0.100149	0.157047	0.213428	0.0174873	0.0773208	0.895542	0.787899	0.793995	0.770403
hsa-mir-641	0.563562	0.942353	0.640108	0.0359869	0.980769	0.257255	0.0738275	0.328565	1	0.545138	0.980769	0.980769	0.601285	0.328565	0.152334	0.152334	0.152334	0.299976
hsa-mir-642	0.646786	0.22653	1	0.483722	0.887762	0.213583	0.596744	0.0312286	0.545138	1	0.980769	0.596744	0.663847	0.257255	0.455664	0.19795	0.431674	1
hsa-mir-651	0.691503	0.73376	0.455664	0.285248	0.323175	0.0312286	0.219356	0.678441	0.455664	0.176095	0.00825971	0.583702	0.0727418	0.285248	0.570795	0.615757	0.942353	0.762396
hsa-mir-656	0.172327	0.372468	0.323017	0.0881623	0.563562	0.372468	0.347182	0.582281	1	0.90407	0.35212	0.347182	0.640108	0.942353	0.172327	0.0454292	0.172327	0.90407
hsa-mir-660	0.769914	0.835649	0.242022	0.742384	0.24784	0.246315	0.0175999	0.0625154	0.567201	0.62592	0.133875	0.951261	0.732927	0.62592	0.0549506	0.873732	0.96112	0.399759
hsa-mir-7	0.356019	0.591735	1	0.431855	0.859775	0.177965	0.0903307	0.160698	0.890282	0.469819	0.811669	0.0465519	0.33491	0.046155	0.646019	0.753887	0.562603	0.0522698
hsa-mir-767	1	0.632456	0.793995	0.938781	0.259591	0.0376575	0.68166	0.960741	0.976152	0.087093	0.00852589	0.0626244	0.0206939	0.914374	0.0814001	0.985723	0.837592	0.633951
hsa-mir-767	0.73376	0.408432	0.162559	0.5854	0.887762	0.694489	0.342926	0.0376575	0.887762	0.149823	0.299976	0.496342	0.985723	0.570795	0.257255	0.278057	0.213583	1
hsa-mir-768	0.687874	0.242022	0.670042	0.289921	0.550824	0.18811	0.0265532	0.970923	0.289537	0.218857	0.798218	0.256401	0.778953	0.0420466	0.164738	0.566258	0.503132	0.798375
hsa-mir-92a	0.779931	0.836385	0.325112	0.932231	0.193648	0.912937	0.219833	0.219833	0.951565	0.0355844	0.117086	0.44407	0.185451	0.0534126	0.618429	0.473531	0.122873	0.0564852
hsa-mir-93	0.761352	0.584605	0.6885	0.488655	0.798636	0.618429	0.401902	0.551667	0.473531	0.229102	0.855407	0.029665	0.74291	0.798636	0.44407	0.0476852	0.349575	0.761352
hsa-mir-95	0.268586	0.779769	0.0355148	0.020305	0.0533766	0.268586	0.128823	0.229084	0.0216254	0.290486	0.165523	0.817322	0.980609	0.362161	0.511662	0.185384	0.0261846	0.415614
hsa-mir-96	0.331102	0.836385	0.670699	0.238628	0.362233	0.375157	0.653082	0.779931	0.313309	0.415666	0.990306	0.325039	0.74291	0.429741	0.990306	0.0450128	0.162399	0.248395
hsa-mir-99a	0.0475173	0.714657	0.0559637	0.324087	0.335664	0.107687	0.0307691	0.329582	0.22875	0.360706	0.0166198	0.567201	0.779647	0.87442	0.368488	0.519116	0.0932151	0.511262

## Sheet: Supplemental Table 5
Supplemental Table 5 - mRNA targets found by TargetScan and TargetSpy for the four identified miRNAs
miRNA	628	193b	328	10b
Gene Target Symbol	COL4A3BP	TMEM170B	SH2B3	SH2B3
	GLYAT	SMC4	DNAJB6	HMGXB4
	RGS19	ARPC5	GPC6	GJC1
	MRVI1	ENAM	RASGRP1	DNAL4
	VAT1	RBM12	WASF2	GPR64
	ENOX2	YAF2	LHFP	TRIM13
	AGR2	ABI2	CTDSPL	CTDSPL
	CXCR6	PSME3	TRIB1	TRIB1
	CHL1	TOPORS	STX6	DCAF7
	ZBTB6	NET1	SPRY3	SPRY3
	ZNF273	SF3A1	CDKN2A	NET1
	FGL2	IKZF1	CITED2	DSCR3
	ASCC3	ADARB1	UNC13B	MRVI1
	METAP2	YAP1	SEMA3C	CORO2B
	NUDT21	ARIH2	RPP30	TAB1
	WWP1	CLEC10A	ARID3B	ENOX2
	LDB3	TADA3	FUT9	APPBP2
	ERLIN2	ENOX2	ADCY1	AGR2
	WBP4	SEMA4F	YME1L1	ARPC1A
	KTI12	DDX17	MMP24	SLU7
	TEX261	NEBL	LYVE1	PAICS
	FCHO2	AGPAT1	MAN1A2	TGOLN2
	ZNF501	RPP30	IFI44L	CAMKK2
	C10orf4	TGOLN2	TMED10	CETN1
	ADD3	POLR3G	VAX1	PNMA2
	TMEM132D	IGF2BP1	ABHD2	ADCY1
	BTBD11	CELF2	CHD2	RFPL3
	CNTD1	CETN1	CIT	HBS1L
	C17orf57	ADCY1	PTPRT	ZBTB6
	ZSWIM7	LASS1	ADAMTS6	ZNF273
	KLF17	MAP3K2	SLC2A6	UTP14A
	COL9A1	CTSC	INMT	MAN1A2
	LYPD6	HBS1L	POLI	RAB35
	PACRGL	ZBTB6	AKAP2	RBPMS
	PM20D2	NEU3	ERI2	DDX52
	APOOL	FAM114A2	C14orf126	ABHD2
	DCAF8L1	CBX1	TP53RK	TPPP
	SPTY2D1	NUDT21	SCAMP4	TRIOBP
	CSNK1A1	CPSF6	CYP2U1	WDR5
	TMEM99	CHD2	CHRNA4	PTPRT
	SAMD13	TRIOBP	PALM2	KIF3A
	HFE2	PTPN21	ELFN2	LDB3
	PM20D1	KIF3A	TMEM132B	LZTS1
	GPR155	LZTS1	GALNT13	ABCB8
	CXADR	MAP4K5	ATG4A	CHM
	SLC2A12	ABCB8	DDIT4L	AKAP13
	NKAIN2	PADI2	LRRC58	CA5B
	ABCA13	SNX18	TSEN15	ERI2
	LINGO2	FKBP9	RAB3IP	GPR44
	FAM122B	SLC2A13	MORN4	SNX18
	SLC5A8	PALM2	DNAJC24	PXMP4
	PPTC7	PWWP2A	LRRK2	ADCY7
	DAZ1	ZNF618	TMEM132D	PLCD3
	DAZL	WDR92	CCR5	MGAT4A
	ZNF676	NUS1	NIPA1	FKBP9
	DCTD	RAB3IP	CCBP2	C1orf212
	UGT3A2	SSX2IP	C16orf55	CHRNA3
	LCA5	CLCN5	ZSWIM7	SIGLEC11
	ADAMTS17	MORN4	GABPB2	PALM2
	ZNF431	CLIC1	CNP	EFHC1
	DLAT	TPP1	AADACL3	SORCS1
	DLX6	DNAJC24	CNR1	C1QTNF7
	DYNC1I1	C12orf59	C1orf173	ZNF618
	DPYS	CLTC	MYOM3	PCMTD1
	EDNRA	SLC24A4	KLF17	FCRL1
	LOC200726	NIPA1	FAM168B	GBP4
	RAB12	EARS2	ACVR1C	ZNF689
	PDE12	HSF5	LRRC15	LYSMD3
	TAPT1	ZNF813	UROC1	FAM36A
	EPHA7	C1orf96	SLC31A1	FAM129A
	EXTL2	AADACL3	UNC5D	ARAP2
	BPTF	TYW3	FAM123B	RAB3IP
	FANCF	UBXN10	PTCHD1	EXOSC6
	TMEM26	EDARADD	SRXN1	ZMYND17
	CCDC89	COL4A3	ZNF280B	ZNF488
	TWISTNB	TBC1D20	MAPK14	PDZD8
	JAZF1	ANKRD54	XRRA1	ADD2
	SLC35F1	C2orf60	ZNF785	IKBIP
	RUFY3	FAM168B	CD300LF	BTBD11
	RAB18	C2orf50	UNC45B	SENP8
	PHLPP2	PQLC3	CD300LG	WHAMM
	MYT1L	SLC31A1	C19orf55	CCBP2
	SMG1	JMY	SYT6	SNX20
	NCOA6	CMBL	PHF13	CYB5D1
	KIAA0922	DNAJC21	ENTHD1	GGT6
	ZCCHC11	COX11	FAM109B	ZNF491
	PUM2	DCAF4L2	NFAM1	GABPB2
	NUP188	CRKL	NIPAL1	CNP
	DDX58	MACROD2	SLC36A2	AADACL3
	RICTOR	NRSN1	LOC153328	CNTF
	ZBTB38	EIF5AL1	PLEKHG4B	CNTFR
	REXO1L1	C10orf46	CYLD	TATDN3
	PAN3	ZSCAN29	FAM84B	COL4A4
	ST6GALNAC3	GSG1L	CYP19A1	TAF8
	GCET2	SLFN13	SLC5A12	ICA1L
	TRIM58	UNC45B	TMTC2	KCTD18
	SOSTDC1	DPY19L3	REM2	PQLC3
	KBTBD2	ZNF714	DAZL	RTP1
	EGFL6	ZNF681	ITPRIPL2	C4orf32
	AUTS2	SLC35F3	DBT	CCDC127
	WSB1	CTNS	GBP6	ADAT2
	PTPN22	CTNND2	LPPR5	CR1
	PTPN18	NFAM1	IL28RA	HGSNAT
	SH3YL1	FAM117B	DDB2	CREBL2
	TPK1	FAM84A	LONRF2	FAM123B
	KCNV1	C5orf41	DFFB	CRX
	ZBTB11	CYB561	TMEM64	C20orf160
	PDE7B	CYLD	OLFML2A	ZNF280B
	PCDH17	CYP1B1	ZNF169	DUSP19
	ADAMDEC1	AMOTL1	SYNPO2	MPP7
	GCLM	ADRBK2	DLX3	FGFBP3
	HTATSF1	NXNL2	DYNC1I1	KDELC2
	GOLGA8G	RIBC1	DOCK3	ALG10B
	NBPF15	DENND5B	DSC2	E2F7
	ZNF326	DYX1C1	RCAN1	C14orf37
	CCDC141	RHBDL3	DSG3	SLFN13
	C3orf70	ZNF320	MEGF9	UNC45B
	C6orf182	GBP6	EHHADH	ZNF578
	RPL7L1	LONRF2	EIF2S1	ZNF681
	GRIK2	DDX6	ELF1	SLC30A7
	C7orf68	PRICKLE2	SLC5A9	KNCN
	RPA4	SPATA5	C1orf69	MOBKL2C
	SLC25A24	TRIM60	APOBEC3F	EXOC8
	SLC40A1	DCP2	ARHGAP27	LSM14B
	HUNK	C6orf118	ZBTB7C	DNAJB7
	APAF1	SLC30A8	TIGIT	NFAM1
	HNRNPU	OLFML2A	C4orf46	PROM2
	HOXD1	ADAMTS18	TMEM184A	SEPT10
	ZNF260	ADAMTS19	ANKS6	C2orf67
	ZNF677	DLG1	EPB41	GPR155
	AMIGO2	SLC26A2	FAM123C	DTX3L
	IL7	LPAR1	KIAA2018	CTSS
	CXCR2	EDNRA	ALAD	C3orf21
	AQP4	EIF2S1	F2R	CCDC52
	IPP	EIF4B	F5	SH3D19
	C10orf96	CC2D1B	ORAOV1	ZNF595
	C5orf34	C1orf69	HNRNPA3	MBLAC2
	KIF5C	TET3	OPN5	ARSK
	KPNA1	SPNS3	C7orf41	AMOTL1
	SH2D4B	PTPLB	SCUBE3	TMEM213
	GOLGA8E	FAM123C	FDX1	GIMAP8
	LAMA4	SENP5	FGA	FAM84B
	LAMP2	ERBB4	IKZF2	CSAG1
	C12orf76	ESRRG	PHLDA1	DAG1
	C9orf170	EZH1	AAK1	DENND5B
	XKRX	F5	KIAA1012	ITPRIPL2
	LY75	F9	ZNF365	RHBDL3
	ARSB	TMEM26	KLRK1	TRPV3
	MATN2	CCNY	SHANK2	DBT
	MID1	HEPACAM	CCT5	OR7D2
	MLLT3	SKA3	TRIM32	ZNF100
	GOLGA8B	FKTN	MAPKBP1	LPPR5
	NCBP1	TWISTNB	KLHDC10	KANK4
	NCF2	NAPEPLD	TMCC1	LONRF2
	NEDD4	LNX2	PHLPP2	PRICKLE2
	NEFL	KCTD20	SWAP70	KBTBD12
	NEK2	ALDH9A1	PEG10	SPATA5
	NPC1	FGF12	ZNF423	CRISP1
	NSF	RRAS2	KIF1B	LCA5
	OGN	KIAA0831	FSTL4	DFFB
	OPRK1	ZNF510	ATP10B	TIMM8A
	DEC1	ZNF365	FLI1	SLC30A8
	PCDH9	SEPHS1	GPATCH8	OLFML2A
	ISOC1	RPIA	SYT11	COMMD6
	FAM135B	KDM2A	JMJD6	DYNC1LI2
	DERA	FOXL1	FLT3	DOCK3
	FAM108B1	PDZRN3	DTX4	DRP2
	RDH11	MON2	PACS2	DSCAM
	SLC45A2	ENDOD1	OTUD3	SLC26A2
	PHF20	GGA2	ZC3H7B	ABCA1
	PCSK2	RRP1B	FMO2	EIF1AX
	DACT1	KIF1B	HAUS5	NLRC3
	CRNKL1	CDK19	ANGEL1	DZIP1L
	ZNF117	SARM1	ZNF629	ZNF626
	UBR5	TBC1D2B	PSD3	CC2D1B
	UBE2J1	FLI1	KIAA0895	C1orf69
	LIMA1	GPATCH8	AHCYL2	FBXO45
	GTSE1	SMC5	NUDCD3	MUC20
	DTL	N4BP3	SIRT5	PLD6
	VTA1	SEPT6	SIRT3	FAM116A
	ARMCX3	GGA3	RYBP	TMEM192
	TTRAP	RTF1	LEMD3	CCDC125
	LUC7L2	ANKRD28	SLC7A11	TMEM184A
	RBMX2	OTUD3	PRKD3	C9orf91
	PHAX	ZC3H7B	PPIL2	SLC25A43
	ATP6V1A	AGTPBP1	CNOT6L	EPB41
	PLAG1	BICD2	FUT1	LASS3
	PLCB4	WSCD1	G6PC	EPHA4
	CLIC6	C22orf9	TTLL10	FAM123C
	CHRAC1	DNAJC13	RNF169	CLN8
	DCUN1D1	RPGRIP1L	GABRA4	SENP5
	ANLN	DPY19L1	C17orf103	ERG
	ATAD2B	WDR7	ST6GALNAC3	EZH1
	EPB41L4B	PHF15	TECPR1	F7
	ATRX	KIAA1045	TRIM58	FABP2
	VPS13C	CRTC1	HSPA12A	ATAD3C
	TBC1D8B	AHCYL2	NSL1	TYSND1
	UCKL1	NUDCD3	PNKD	TPCN2
	PIGX	ABCB10	C2CD2	SKA1
	BANK1	ZFYVE26	SPATS2L	FCAR
	MAGOHB	KIAA0240	L3MBTL	FCGR3A
	TMEM38B	POFUT1	IPCEF1	C6orf89
	PPP2R1B	R3HDM1	SS18L1	FCGR3B
	PBRM1	ATP6V0A2	ZNF500	RNF182
	RCBTB1	ZNF346	PPP1R16B	GPR97
	NUDT15	DDAH1	CCDC69	FDX1
	C4orf19	CDC42EP4	LRRC32	AAK1
	SPTLC3	CD2AP	FBXW2	ICK
	C14orf106	BACE1	TIAM2	NLRP1
	WDR33	RUSC1	FBXO10	ZNF510
	CAMK2N1	SLC7A11	FBXO9	KIAA1012
	TNFRSF19	PRKD3	SLC17A5	ANKRD6
	ELAC1	C15orf2	GREM1	FOXJ3
	DEPDC1	CNOT6L	HS6ST3	KIAA0907
	YEATS2	FYB	GJA1	FKBP5
	NUP133	ZBTB38	VPS41	CARD8
	PRKCA	UBN2	B3GAT1	RUFY3
	FTSJD1	BRWD3	AMPD3	IGSF9B
	MBNL3	FAM26E	ZNF330	FAIM2
	SCN3B	GABBR1	TMEM97	TMCC1
	SEPT3	CALHM1	CECR6	PHLPP2
	MAPK6	GABPA	GM2A	MON2
	PCDHB9	CCDC108	GNB1	ZHX3
	ANKH	RNF144B	GNG7	GGA2
	MASP1	GABRB2	GOLGA1	WAPAL
	EIF5A2	GABRB3	GPM6A	SETX
	FSTL5	C17orf103	C12orf51	FOXO3
	SPIRE1	TAB3	KSR2	TTLL5
	C21orf7	POU2F3	GXYLT1	SPG20
	PLSCR2	CCDC28A	KIAA0284	ANKLE2
	DAZ3	SYF2	C16orf54	CLCC1
	DAZ2	SS18L1	C17orf58	SEPT8
	MAN1C1	PPP1R16B	TMEM105	MESDC2
	DAZ4	APPL1	C19orf54	ARHGEF9
	PAK7	POLDIP2	SLC25A34	PACS2
	SLC39A10	WIPI2	GPR26	KIAA1024
	ATP10D	TANC2	SH3PXD2B	ZC3H7B
	SENP7	RSL1D1	ARL10	ACSL6
	MIB1	STEAP2	DTWD2	C22orf9
	KLHDC5	GART	PPIL6	AFF2
	KLHL14	GAS1	GRIK3	KHNYN
	USP37	HEYL	N6AMT1	USP24
	ANKRD36B	OSTF1	CLEC2D	PSD3
	C1orf114	HS6ST3	EEF2K	PUM2
	PTX3	NPAS4	PADI1	CRTC1
	MID1IP1	ABL2	PNMA3	NUDCD3
	RAB13	GJA3	SLC39A3	ZDHHC17
	RAB27B	MLH3	PILRA	RYBP
	PBOV1	PPA2	RAX	AP4E1
	RFXAP	GHITM	HDGF	TRAM1
	ABCE1	TAF5L	HIP1	POFUT1
	ROCK1	AFF4	UBE2K	TTC33
	RP2	OXGR1	HMGB1	PSD4
	RPS6KB1	ARFIP1	APAF1	RASD2
	NAPB	RABGEF1	HNF4A	CLEC5A
	NEUROD6	EML4	ACACB	DAPK2
	SFRS6	CECR6	HOXB4	MKRN2
	KRTAP24-1	GMFB	DNAJB1	PRND
	HHIP	GNA12	ICAM1	KPNA6
	C5orf28	GNAI3	CCDC137	SLC7A11
	CLEC7A	GNAO1	C17orf51	TMEM2
	MFSD1	GNB1	KY	CADM1
	DEPDC6	FAM154B	MYLK4	C9orf5
	AIDA	PLA2G4D	ZNF517	PPIL2
	SLC1A7	C17orf58	KIAA2022	OSBP2
	C8orf33	FLJ35220	ZC3H12B	ATP6V0D2
	SLC8A1	SYPL2	LRIT2	FUT1
	SP100	GPR26	GLDN	C6orf167
	SPAG1	FAM126B	ZSCAN22	G6PC
	BPGM	C3orf23	CDKL4	UBN2
	SRPK2	SH3PXD2B	LRRTM3	RNF169
	ELOVL4	SFRS12IP1	SLCO4C1	REXO1L1
	STK4	ATP11C	IL1RN	CALHM1
	BTC	FAM133A	IL5	GABRA4
	SYT4	ANK3	SHROOM2	PCSK9
	C2orf3	GRB10	IL8	GK5
	BTK	MRPS18B	IL12B	GABRG1
	TFAP2A	MRPL42	TNFRSF9	GABRP
	TGFBR2	GRIK3	INCENP	PLCXD2
	TSHR	ZBTB44	ITGAL	NEGR1
	FAM155A	GRLF1	ITGAV	METTL7A
	NBPF16	HSPC159	KCNA1	SUMF2
	OSGIN2	COMMD9	KCNA7	FAM119B
	WNT8B	N6AMT1	C9orf102	THUMPD3
	XPC	CLEC2D	KCNJ5	NSL1
	YWHAB	CXCL2	KLHL30	ULK3
	PTTG1IP	UQCR10	KCNMA1	SPATS2L
	VEZF1	YPEL1	KRTAP10-5	ATRNL1
	ZNF193	ICOS	SBK1	APPL1
	ZNF195	UBN1	C16orf87	SGEF
	KCNAB1	PNMA3	ZNF749	CCDC69
	SCRN3	SLC39A3	FAM69A	SERBP1
	ARSJ	HDLBP	VGLL3	TIPRL
	PANK3	HUNK	IYD	FBXW2
	HSPBAP1	HLCS	GDF6	GMEB2
	BBS10	HMGB1	LCK	GATA3
	TTLL7	HOXC6	ZNF321	FBXO10
	ZNF552	HSBP1	PATE2	PLA2G2D
	ALG13	IGSF3	SNX19	LHX6
	C7orf58	DNAJB1	C17orf102	MDGA1
	FAM188A	LUZP2	FLJ45079	GPR110
	NRSN2	ZNF181	C3orf72	PGBD2
	ZNF606	ZNF546	C4orf3	ABL2
	NAA50	C1orf174	LPO	TCL6
	EDEM3	TMEM173	LRP6	GJA5
	CYB5B	KIAA2022	MAFG	NPHP3
	SYNC	SH3RF3	MAGEB4	ANKRD1
	SGPP1	MTX3	MAK	VPS41
	RNF170	MACC1	MAP4	AFF4
	RNF146	IFNW1	CHST6	VPS4A
	DNAL1	IGF1R	CD46	SERP1
	CASP3	IGFBP5	MEIS2	TMEM97
	C19orf12	ZNF445	MKI67	GLS
	FAM107B	BMP8A	TRPM1	PCLO
	ITCH	ING1	MNT	GNAI3
	FSD1L	IRF1	MOBP	GOLGA3
	TM2D2	ITGB8	TRIM67	GPR4
	MAGT1	ITK	PALM2-AKAP2	BLOC1S2
	FBXO30	ITPKB	MYO6	SLC25A45
	USP42	KCNA1	PPP1R12B	ANKRD52
	ZNRF3	KCNA7	NCAM1	KSR2
	ARID5B	KCNC2	ATM	ZDHHC22
	SYVN1	PEAR1	NEUROD1	FAM154B
	PARD6B	C3orf62	NF2	C16orf54
	RTN4IP1	PTAR1	NFIX	ZSCAN1
	RGS5	ZC3H6	NINJ1	GPR26
	TMEM87B	KLRD1	NOTCH4	UNC80
	SERAC1	KRAS	NTRK2	ZNF621
	ZIC5	CLEC17A	ROR1	SUMF1
	ZNF518B	FAM69A	CISD2	DCAF4L1
	SCARF1	BEND4	OAS3	CYP4V2
	RNGTT	ARHGEF37	TBC1D25	ZNF454
	ACTN2	NUDT19	OPHN1	FAM83H
	TRIM24	RHOH	CLDN11	LOC286238
	SYNJ1	C12orf76	PAFAH2	GRIK1
	ARHGEF7	C13orf35	PAK2	GRIK3
	VNN1	ZNF772	ARHGEF3	SLC43A3
	TAX1BP1	C3orf72	PAPPA	CCDC59
	BCL10	LRP6	PAX5	GRLF1
	MBD2	ARSB	ASAP1	MRPL22
	C3orf15	MAP3K1	F11R	HSPC159
	CCDC109A	MAP3K3	PDE11A	N6AMT1
	PAPSS1	MKLN1	ACOX1	SAP30BP
	ANGPTL1	MMP16	FAM18B	CXCL3
	ASH2L	MOBP	ST8SIA3	CYP2S1
	CCT6A	UNC13C	SH3GLB1	TFCP2L1
	USP8	PLIN5	FAM82B	UBN1
	CD1D	MSN	IRAK4	RBM15B
	SLC24A1	MTHFD1	HSD17B12	PNMA3
	ZNF300	MTHFR	PLCE1	C16orf5
	CD5	MYO5B	NIN	SLC39A3
	OXNAD1	MYO10	GP6	HAS3
	LMBRD2	PPP1R12B	UBR5	HTT
	DLG5	ATM	PDE4B	HUNK
	STK17B	NEDD9	PDE4D	UBE2K
	SHKBP1	NF1	ANKFY1	HLA-DOA
	CD83	NOTCH2	RAB6B	HLA-E
	PIGM	ROR2	ASB1	HMGN2
	UBE4A	ATP2B4	ASB4	HMGCR
	KIF3B	C2orf64	EMCN	APAF1
	SYTL4	OAS3	LUC7L3	APOF
	CYP7B1	OPCML	ZAK	HNRNPK
	MAP4K4	PAFAH2	SIX4	RAB37
	ZNF254	AK3	PHKA1	XIAP
	GREB1	RNF141	ATP6V1B2	NDST1
	BCLAF1	ACOX1	SERPINB9	HTR7
	TOMM20	MRPS16	PIK3C2B	HUS1
	ZNF623	FAM18B	PLAG1	S100A7A
	CEP170	ST8SIA3	ZFYVE1	TMEM119
	KIAA0196	PCM1	PLGLB2	C17orf65
	CLEC2B	FAM82B	PLGLB1	NANOS2
	TRAIP	ZNF639	PLOD2	ANKRD45
	LYPLA1	C3orf19	PRKAG3	CYP27C1
	HTATIP2	TMEM216	PMP2	ID4
	SLU7	PCSK2	CHRAC1	ZNF517
	CDC42EP3	PDE1A	UBL3	ZC3H12B
	MTHFD2	SNX9	CYCS	MS4A10
	ZNF275	RNF138	GNG2	FREM2
	CEACAM7	PCYOX1	POLR2E	NEK5
	LYVE1	PDGFRA	SIAE	ZSCAN22
	C14orf1	PDGFRB	CCDC93	IFIT2
	ATG4A	CAB39	SGTB	ACTBL2
	PSTK	CD244	PAF1	ZNF81
	ANAPC16	LUC7L3	MED1	LANCL3
	SLAIN1	PFKFB2	A2BP1	TBX10
	LSM12	CDK14	SLC6A20	IGF1R
	ZNF440	PGGT1B	TRIM44	IGF2
	COL4A6	ATP6V1B2	DNAJB12	SKA2
	FAM168B	PIGA	MED18	FAM131C
	KCNH8	PLAGL2	TRIT1	C2orf48
	CLVS2	CLIC5	GATAD2A	ZNF445
	COX11	CSNK1G1	C1orf26	IL1RAP
	ZFP28	POLR2E	TMEM104	IL5RA
	DUSP19	TAF7L	INO80D	IL6R
	SPTY2D1	POU2AF1	C14orf101	CXCR2
	EXOC8	USP53	C9orf6	IL10RA
	ADIG	MTMR12	GEMIN8	IL11
	ADRA2A	GNL3L	PDPR	ZBTB41
	SMYD1	HES2	SOBP	TNFRSF9
	CNTN4	SLC6A20	BSDC1	IRAK2
	CYP11B1	IL17RD	MRPS18A	IRF4
	HSFY2	DIRAS2	FAM86C	ITGA2
	USP54	BNC2	PGM2	ITGB2
	ZNF791	MBTD1	PPP2R5D	IVD
	ZNF540	HAUS6	C4orf19	KCNA1
	DLAT	ZNF562	CPPED1	KCNJ6
	DYNC1LI2	PGPEP1	YOD1	ZC3H6
	SLC26A2	SNRK	CHST12	FAM21A
	PLD5	TMEM104	PRKAA2	SHISA2
	C3orf58	PALMD	TMEM127	ZNF470
	VWCE	RETSAT	RUFY2	CDHR4
	SKA1	PXK	IPO9	VGLL3
	LNX2	CHTF8	H2AFJ	IYD
	TRIM32	FAM120C	PRKCA	RBM12B
	IGSF9B	PARP16	CENPN	ZNF793
	SPG20	C20orf11	ASH1L	ARL13A
	RGL1	TTC22	WSB2	LIF
	DIP2A	PLEKHB2	ACSS2	ZNF321
	PLCL2	PDPR	BCAP29	ARL1
	VPS13A	C7orf42	PRKX	PRAMEF13
	FN1	UACA	PRKY	C3orf72
	MORC3	C10orf118	ANKH	C9orf170
	ADAT1	RFWD3	ZC3HAV1	PPAPDC2
	FPR3	VPS13D	SLAMF8	LTBP2
	SGK3	TRIM62	UGGT1	M6PR
	RAB38	SLC38A7	SPPL2B	CAPRIN1
	MTCH2	TMEM39A	DAZ3	MAP4
	IFIT5	NUDT15	DAZ4	ARSD
	FTSJ1	RSAD1	PSMD9	ACBD7
	ZNF318	C5orf22	ZNFX1	MAT1A
	CNPY4	AGPAT5	C15orf17	MCC
	FUCA1	SYNJ2BP	THOC2	CHST6
	FBXO33	FAM46A	KIAA1147	MDM2
	COL24A1	LRRC40	ATP10D	MDM4
	ZNF549	DENND4C	GPR126	CIITA
	FRMD3	MFN1	PTEN	MICB
	C22orf24	PRKACB	PTGIS	MME
	DCAF12	RUFY2	RAB22A	MMP14
	GALNT3	IPO9	PTHLH	MOG
	SETBP1	NECAP2	NDRG3	MPI
	ANGPTL3	ODZ3	KIAA1161	MPL
	GMFB	HHAT	SHROOM4	MAP1LC3C
	GPM6A	H2AFJ	ARHGAP31	C5orf56
	MKX	C6orf64	KCTD16	SPDYE3
	CYP4V2	PRKCA	NUFIP2	MYO1B
	TMPRSS11E	FGD6	ALPK3	MTM1
	ABT1	BDP1	KLHDC5	MYBL1
	UQCR10	PAG1	CRAMP1L	MYO5B
	STRN3	TMEM165	DIP2B	MYO10
	SLC40A1	WSB2	EPB41L5	ATM
	HNMT	ERBB2IP	KIAA1632	NDUFV3
	PABPC1L2A	LANCL2	MARK4	SEPT2
	NEK5	CTTNBP2NL	GATAD1	GIMAP6
	IGFBP3	MAPK1	PTPN11	NF1
	C2orf48	NSFL1C	SLAMF7	ATP1A2
	IL1R1	UBFD1	NEUROD4	NHS
	SHROOM2	PCDHGA7	PEX5	NKTR
	AQP4	ANKH	PYGB	NPTX1
	INSIG1	KLK10	RGL2	NRL
	JARID2	PSEN1	RAC2	TNFRSF11B
	KCNS1	AGPAT4	IL22RA1	OPHN1
	KDR	STARD7	TMEM8A	P4HB
	KIR2DL2	MCCC1	KDM5A	PLA2G3
	ARF6	SPPL2B	TGIF2	PAPPA
	C16orf87	RGMA	BACH2	HP1BP3
	RGS9BP	CDC42SE2	SLC5A7	PDCL
	SAMD5	C12orf5	ZNF704	F11R
	C1orf141	RALGAPB	SORT1	PDE11A
	KLHL31	KIAA1191	TSPAN31	TMED5
	ERVFRDE1	C15orf17	SCML1	ACOX1
	ARSB	KIAA1147	SCN9A	RRP15
	MAGEB3	VN1R1	RNF123	FCF1
	MAN1A1	ATP8B2	NAPB	TRNT1
	CD46	KIAA1199	CHP2	FAM108B1
	CXCL9	LYRM2	SELPLG	IRAK4
	ARHGEF35	PTEN	NECAB1	C3orf18
	MTCP1	PTGER3	SFRP1	SS18L2
	NAP1L1	RAB22A	IKZF4	CPA4
	NDUFS1	CYP20A1	GZF1	PHF20
	NEK2	SHROOM4	TTC31	PCSK2
	ATP2B1	USP31	SGCB	MRPL30
	NTF3	ESYT2	SGCD	PLA1A
	ABHD5	MKL2	ATPAF1	CRLF3
	PLCE1	KIDINS220	CCDC21	SNX9
	CRIM1	AARS2	ST6GAL1	MAGEC2
	C3orf19	ZNF608	CDCP1	DCDC2
	RSRC1	NYNRIN	C12orf43	ATP5F1
	TAF9B	KCTD16	MRPS26	JKAMP
	SLC26A4	TMEM181	SLC1A7	PDGFRA
	KDM3B	WDFY1	SLC5A3	PDHA1
	CLDN22	WDR48	C8orf33	HMP19
	GAR1	C8orf79	SLC5A5	ENPP1
	LEPROT	PITPNM2	SLC6A12	SUFU
	KCTD9	ZBTB4	SLC7A2	CMPK1
	MFSD6	KIAA1549	SLC8A1	SIX4
	CCDC40	GPAM	PCP4L1	ATP6V1B2
	WDYHV1	ZDBF2	SLC9A2	PIGR
	PRPF38B	VAT1L	BMP7	PIK3C2G
	PRH2	FAM160B1	SLC16A1	PKNOX1
	MYNN	KIAA1609	RASL11B	PKP1
	LMOD3	ANKRD36B	TRAK2	PLAGL2
	HTRA1	PURB	SNCB	PLXNA2
	TMEM9B	RHOU	SNX1	PML
	PSG3	ZNF71	SOX12	PMP2
	PSG9	PLEKHA2	SPAST	CSNK1G1
	PLSCR4	GNB4	SPTA1	CPSF2
	BIRC6	RHAG	STAT5B	C1orf190
	ZNF490	GUF1	TACC1	CYCS
	SHROOM4	RPGR	TAP2	POLH
	RGAG1	RPL27A	TAPBP	POLR2E
	ARHGAP20	SORT1	TAT	SLC38A2
	PTN	SC5DL	TFAP2C	RBM27
	NCOA5	ATXN1	LEFTY2	GNL3L
	BBS1	SCN1A	TGM4	WDR5B
	RBBP5	SCN2B	TGFBR3	ATRX
	RFX4	SCN4B	TCHH	HES2
	RLF	ELMO2	TIMP3	CROT
	RPS6KA1	TP53AIP1	TLR2	ZNHIT6
	RPS23	MAGEF1	TMPO	PPEF2
	VPS52	PAPD5	TNR	RAB39
	SALL2	TMPPE	CAPN5	ZNF562
	CCL5	CDH22	FAM22D	PAQR5
	C5orf43	RGS18	SLC35E2	WDR55
	IKZF4	SUDS3	UBE2G2	FAM46C
	ZMAT3	SGCD	UQCRB	PGPEP1
	PABPC1L2B	CCDC14	MRPL49	ST7L
	SIAH2	NMNAT1	VDR	CYP2W1
	ST6GAL1	ST8SIA1	WHSC1	CMTM6
	SIGLEC1	SLC1A1	C18orf1	IMPAD1
	SP2	RAPH1	ZNF70	RNF125
	SSR3	SLC1A2	ZNF192	C9orf6
	BRCA2	TMEM135	ZNF208	TTC12
	KLF9	SLC1A4	SLC30A2	C2orf18
	THRB	RSRC2	OTUB2	HERC6
	TSHR	WNK1	ZNF655	STX17
	ZNF187	SLC5A3	NKAIN1	PTCD3
	PTP4A1	ZBTB8A	RNF219	C9orf40
	KCNAB1	FAM23A	SH3TC2	AGGF1
	MRP63	SLC6A13	OGFOD2	CRTAC1
	HAUS3	IQCJ	C22orf29	LARP1B
	FZD3	BMPR2	ZNF322A	FIGN
	NIPAL2	SP1	LIN28A	UBR7
	NHEJ1	SPN	SGK269	PNPO
	C5orf44	SSR1	TREML2	VPS13D
	ITIH5	SUPT4H1	THNSL1	GOLPH3L
	KATNAL2	CNTN2	MAP6D1	ZNF532
	AMMECR1L	TCF21	PHC3	SETD5
	ZRANB3	TDGF1	PGAP1	LRRC20
	BRMS1L	TFAP2B	ATF7IP2	C4orf19
	DCTN5	TFRC	C17orf68	ACOXL
	CUL3	TGFBR1	HKDC1	LIN7C
	BEX2	TIAL1	OPA3	CNO
	SIP1	TNFAIP1	CCDC68	DRAM1
	ALG10	C6orf35	WDR82	PPP3R2
	FAM104A	UBA52	COASY	YOD1
	JUB	USH2A	ZNF436	PRELP
	CGGBP1	WHSC1	SETD7	SMPD3
	TNFSF11	DAGLA	ST8SIA2	SRGN
	B3GALT1	XK	CALU	TRIM36
	DCAF5	ZIC3	FBXO38	SVOP
	PROM1	ZNF33A	C1orf21	ZNF280C
	HIST1H2AG	ZNF37A	APOLD1	ASAP3
	ZSWIM1	ZNF91	CDT1	THUMPD1
	ZNF551	TRIM25	CCNL2	PRKAA2
	ANGPTL1	ZNF148	TRIM7	TBC1D22B
	CLDN2	ZNF187	NRIP1	ZNF673
	CCT6A	ZNF192	SMC1A	TMEM127
	XKRY	ZNF208	COLQ	KIAA1310
	RASL10B	OTUB2	TLN2	WDR11
	CYTH1	CAMKV	SLC4A9	HHAT
	MED21	C17orf39	KRTAP4-12	ENAH
	GABBR2	ST8SIA4	STK40	FAM21B
	BZW1	C1orf50	FLYWCH1	TMEM184C
	JAKMIP2	FAM134A	DNAJC30	ZNF83
	GINS1	ALDH5A1	STK24	PRKCA
	G3BP2	RDBP	CASP10	FGD6
	MED13	LRRC2	DYDC2	CSGALNACT1
		TMEM231	RAB11FIP4	AXL
		ADIPOR2	SRRM4	SCN3B
		GALNT14	C6orf168	DCP1A
		SH3TC2	SLC12A8	PRKCE
		FAT4	GLYR1	FOXJ2
		MCPH1	BAT2L1	DOK5
		AIMP2	UNC119B	CENPN
		C16orf57	USP30	PRKCI
		C22orf29	C1orf198	WWC3
		C11orf61	WDR73	WSB2
		ZNF322A	FAM86B1	NXT2
		ZYG11B	ATCAY	PRKX
		C15orf29	KIAA1644	ANKH
		ZNF665	RHPN2	YLPM1
		ALS2CR8	DCLK3	KLK7
		MAP9	KIAA1751	EIF5A2
		LPCAT1	ZNF518B	ZC3HAV1
		ZNF672	SCIN	SLAMF8
		THNSL1	PLA2G4C	CDC42SE1
		ERMP1	TP63	PNO1
		SVEP1	JRK	C15orf39
		PHC3	TNK1	SPIRE1
		FBXL18	SNAP23	C21orf7
		PGAP1	TNFRSF10D	TULP4
		ATF7IP2	NRP2	PLSCR4
		DCAF17	SLC5A6	PARP11
		CALM1	MTMR3	PSMD5
		VCPIP1	CACNA1I	GOPC
		FRAS1	C3orf15	PLXDC1
		C17orf68	C9orf140	PSMD9
		PRR3	ERI1	SMURF1
		SETD7	SLC7A6	C15orf17
		SLC7A5	COX19	VANGL2
		HM13	CLDN12	LYRM2
		C1orf21	CLDN2	BAG1
		RNF146	FMNL3	SENP7
		CABLES2	CCDC149	TMEM27
		NRIP1	DKFZp761E198	RAB22A
		DGCR14	CD1D	CYP20A1
		SMC1A	SLC16A3	ABHD6
		LAGE3	CD1E	KIAA1161
		EOMES	ANKRD40	CNOT6
		NUDT12	UAP1L1	PLEKHH1
		C22orf13	CBFA2T2	HEG1
		TLN2	PLXNA4	COG6
		CALN1	YTHDC1	NUFIP2
		IMMP2L	MYOZ3	KIAA1377
		PIP4K2B	DCLK1	TRMT5
		FAM172A	DAPL1	MKL1
		PCBD2	DLGAP2	FNIP2
		FAM175A	STRADA	ZNF492
		ANTXR1	ACPL2	KIAA1549
		PSD2	TIFA	ZFP14
		GARNL3	OPALIN	PTPN2
		DYRK2	MMGT1	SFMBT2
		DCTN5	MAPK1IP1L	PCDHB16
		KBTBD8	RECQL5	GPR107
		ATRN	ORMDL1	KIAA1632
		C6orf168	CD86	PTPN4
		KLF11	TP53INP1	FAM5B
		USP32	HAND2	SLAMF7
		MYO18B	PCYT1B	PTPRB
		PSRC1	ONECUT2	RAD1
		HAVCR2	STXBP5L	PVR
		FAM136A	GOSR1	PYGB
		SLC35B4	ENTPD1	MS4A7
		CGNL1	GABBR2	PRUNE
		JUB	GOSR2	RAB4A
		GAS7	MTRF1	RAP2A
		COPS3	SH3PXD2A	KDM5A
		KIAA1644	RALGPS1	PLEKHA2
		FHDC1	HS2ST1	HRH4
		SSH2	WSCD2	BCL2
		CDC14B	PPIP5K1	RHD
		IRS2	N4BP1	AASDHPPT
		RNMT	CLINT1	GUF1
		TNFSF9	ULK2	RPL27A
		ASAP2	CD74	RPL28
		PER3	GPRIN2	RPL37
		SYNJ2	SECISBP2L	ZNF704
		MTMR3	CD79A	RPS23
		CCNC	HDAC4	RPS29
		BTRC	MLEC	RS1
		NAV3	KIAA0513	SORT1
		NAV1	KIAA0195	SCN3A
		C9orf140	SERTAD2	SCNN1G
		WFDC8	CEP350	FAM111A
		CCNT2	TRIL	MUTED
		SLC7A6	TECPR2	GPSM3
		USP6	RBM19	TRAPPC2
		DKFZp761E198	ARNT2	SEL1L
		SLC16A6	LPGAT1	POPDC2
		PLXNA4	RBM8A	TINAGL1
		MYLK3	SLC23A1	XYLT1
		ACVR2A		ZFYVE20
		CD4		MS4A6A
		CCPG1		FAM196A
		ACPL2		NSD1
		MRRF		NFKBIZ
		UBE2L6		TRA2B
		ZBTB47		IKZF4
		ACVR2B		WIPF3
		PIGM		NOM1
		CIAO1		SGCD
		NMT2		COPS7B
		ARHGAP29		FNDC3B
		MED21		GINS3
		H2AFV		RABL5
		TP53INP1		CDCP1
		PCYT1B		LRRC19
		AKAP6		RAPH1
		ATG5		C14orf184
		PSMF1		SLC1A4
		STXBP5L		C5orf42
		GOSR1		SLC5A3
		ENTPD1		WNK3
		TSGA14		SLC5A5
		CREB5		ZBTB8A
		RAB36		TMEM183B
		CD47		BMP6
		RNF7		SLC7A1
		IKBKE		SLC7A2
		CD59		SLC12A2
		GREB1		SMARCC1
		EDEM1		SNAPC3
		TRAM2		BNIP2
		KIAA0226		SNX1
		SEC14L5		SP4
		PHACTR2		UAP1
		PHF16		SPG7
		RAPGEF5		SPN
		RIMS3		SPTBN1
		SERTAD2		SSR1
		KIAA0141		STAC
		KIAA0494		STAT2
		ARHGAP11A		STAT3
		KIAA0317		STK4
		ZC3H11A		STK10
		ZBTB39		SYN2
		SRGAP3		TAT
		ARNT2		C2orf3
		FAM20B		TEAD1
		SEC16A		TFAP2B
		KBTBD11		TFPI
		ZBTB40		TFRC
		JOSD1		TGFBR1
				THRB
				SEC62
				TNFAIP2
				TPM3
				TPMT
				NR2C2
				TRPC6
				TUB
				TNFSF4
				PRAMEF14
				UBA52
				VDR
				WHSC1
				XRCC2
				YWHAG
				ZNF43
				ZNF69
				ZNF135
				TRIM25
				ZNF202
				ZNF215
				SLC30A2
				SLC30A4
				DNALI1
				CSDE1
				FTO
				C19orf42
				C1orf116
				ZNF557
				C17orf62
				C16orf53
				TMEM231
				C10orf76
				SH3TC2
				TMEM53
				MCPH1
				NARG2
				C1orf115
				AGMAT
				MOBKL2B
				WDR78
				TMEM180
				TCTN2
				BAALC
				MAP9
				NAT15
				MRM1
				SLC35E1
				L2HGDH
				TRMT2B
				C5orf44
				RMI1
				FBXL18
				PGAP1
				DCAF17
				WDR26
				CEP63
				HSD3B7
				DNAJC5
				TTYH3
				PRR3
				STARD5
				KIAA1712
				APOL6
				SETD7
				SLC38A1
				YIPF5
				APOLD1
				SNX27
				ELL
				NUAK2
				SPRY4
				FAHD1
				CAMLG
				USP9X
				SMC1A
				FZD4
				SOX7
				ITCH
				FRMD8
				TMTC1
				SLC25A2
				EIF2A
				CCDC8
				B3GNT5
				MAGT1
				ACAD11
				ZNRF3
				UTP15
				POLR1B
				SDPR
				RAB11FIP4
				L3MBTL3
				LCOR
				SPIRE2
				ZNF527
				PARD6G
				SLC12A8
				PARD6B
				BAT2L1
				HAVCR2
				PPP1R15B
				TMEM209
				SERAC1
				PPFIBP1
				C18orf45
				PIK3R3
				GCM1
				GAS7
				PAQR8
				KIAA1644
				SHANK3
				CCNB3
				KIAA1755
				ZC3H12C
				TSLP
				CDC14A
				PDXK
				CAV1
				TP63
				JRK
				CBFB
				CBL
				PEA15
				ABCC3
				RNGTT
				CRADD
				SNAP23
				TNFRSF10D
				PER3
				PER2
				VNN1
				HIST1H2AG
				C9orf140
				F2RL3
				UCN2
				RNF8
				BMF
				PSTPIP2
				SLC7A6
				LYRM7
				COX19
				ANGEL2
				BPY2
				RABEP1
				CBFA2T2
				CXorf1
				SYNGR1
				CD3G
				C14orf43
				DEDD
				MYOZ3
				ACVR2A
				FAIM3
				RCSD1
				DLGAP2
				DLG5
				CCPG1
				TIMM50
				S1PR2
				NT5C1B
				SDR42E1
				ADIPOQ
				NMT2
				ACVRL1
				ZRANB2
				ARHGAP12
				NTN1
				MED17
				ONECUT2
				ADAMTS4
				ADAMTS1
				GOSR1
				BAG5
				ENTPD1
				H6PD
				RAB36
				RGS6
				HS2ST1
				EDEM1
				RIMS2
				MLEC
				SERTAD2
				RB1CC1
				ZBTB24
				GAB2
				KIAA0319
				CEP350
				CEP170
				PJA2
				CDC6
				FAM20B
				KBTBD11
				ZBTB40
				CLEC2B
				CDH1
				SLC12A6
